# Supplementary material for: Construction of polysubstituted spiro[2.3] or [3.3] cyclic frameworks fused with a tosylated pyrrolidine promoted by visible-light-induced photosensitization
Source: Royal Society of Chemistry journal article supplement (doi:10.1039/d1qo01373d), 2021-01-01
Supplement: d1qo01373d1.pdf [file d1qo01373d1.pdf]

Supporting Information

**Construction of Polysubstituted Spiro[2.3] or [3.3] Cyclic Frameworks Fused with a Tosylated Pyrrolidine Promoted by Visible-Light-Induced Photosensitization**

Xintao Gu,<sup>a</sup> Yin Wei,<sup>\*b</sup> and Min Shi<sup>\*a,b</sup>

<sup>a</sup>Key Laboratory for Advanced Materials and Institute of Fine Chemicals, School of Chemistry & Molecular Engineering, East China University of Science and Technology, Meilong Road No. 130, Shanghai, 200237 P. R. China.

<sup>b</sup>State Key Laboratory of Organometallic Chemistry, Center for Excellence in Molecular Synthesis, University of Chinese Academy of Sciences, Shanghai Institute of Organic Chemistry, Chinese Academy of Sciences, 345 Lingling Road, Shanghai 200032 P. R. China. E-mail:

[weiyin@sioc.ac.cn](mailto:weiyin@sioc.ac.cn). and [mshi@mail.sioc.ac.cn](mailto:mshi@mail.sioc.ac.cn)

**Table of Contents**

|                                                                             |             |
|-----------------------------------------------------------------------------|-------------|
| <b>(1) General Information. ....</b>                                        | <b>S2</b>   |
| <b>(2) Reaction Setup. ....</b>                                             | <b>S3</b>   |
| <b>(3) Optimization of Reaction Conditions. ....</b>                        | <b>S4</b>   |
| <b>(4) General Procedure for the Preparation of Starting Materials.....</b> | <b>S6</b>   |
| <b>(5) General Procedure for the Preparation of 2a – 2ab.....</b>           | <b>S14</b>  |
| <b>(6) Stern-Volmer Quenching Studies. ....</b>                             | <b>S15</b>  |
| <b>(7) Mechanistic Experiment. ....</b>                                     | <b>S17</b>  |
| <b>(8) Cyclic Voltammetry.....</b>                                          | <b>S18</b>  |
| <b>(9) Transformation of Product 2t. ....</b>                               | <b>S19</b>  |
| <b>(10) Scale-up Synthesis of 1j.....</b>                                   | <b>S20</b>  |
| <b>(11) Spectroscopic Data of Substrates and Products. ....</b>             | <b>S21</b>  |
| <b>(12) X-ray Crystal Data of 2a.....</b>                                   | <b>S130</b> |
| <b>(13) References .....</b>                                                | <b>S131</b> |

## **(1) General Information.**

Melting points were determined on a digital melting point apparatus, and temperatures were uncorrected. NMR spectra were measured on a Bruker AC 400 or Agilent (400 MHz) spectrometer. Proton nuclear magnetic resonance ( $^1\text{H}$  NMR) spectra, carbon nuclear magnetic resonance ( $^{13}\text{C}$  NMR) spectra, and fluorine nuclear magnetic resonance ( $^{19}\text{F}$  NMR) spectra were recorded at 400, 100 MHz and 376 MHz, respectively. Data are presented as follows: chemical shift (ppm), multiplicity (s = singlet, d = doublet, t = triplet, q = quartet, sept = septet, m = multiplet), coupling constants in Hertz (Hz) and integration. Infrared spectra were recorded on a Perkin-Elmer PE-983 spectrometer with absorption in  $\text{cm}^{-1}$ . Mass and High resolution mass spectra (HRMS) spectra were recorded by ESI method. The employed solvents were dry up by standard methods when necessary. Commercially obtained reagents were used without further purification. For thin-layer chromatography (TLC), silica gel plates (Huanghai GF254) were used. Flash column chromatography was carried out using 300-400 mesh silica gel at increased pressure. Fluorescence spectra for emission and excitation were obtained on a Hitachi F-4600 FL Spectrophotometer.

## (2) Reaction Setup.

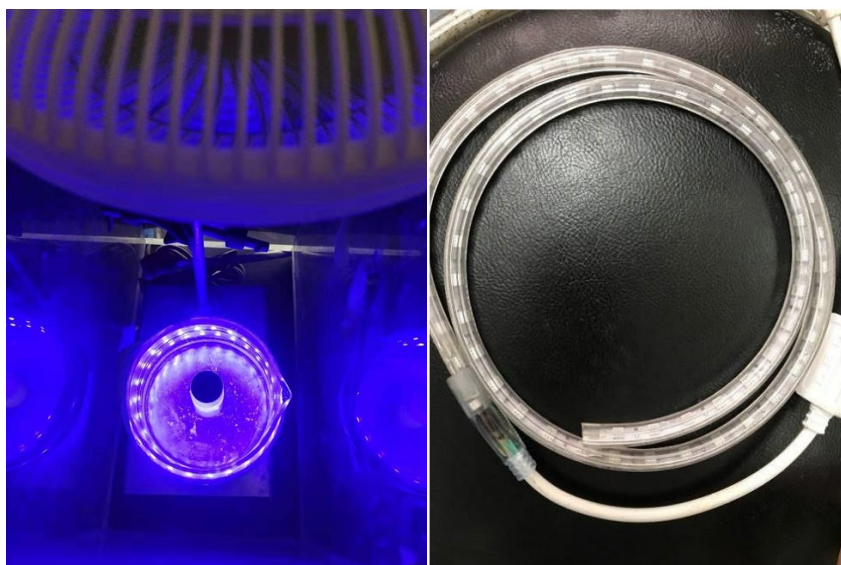

**Figure S1.** 8 W LEDs (450–470 nm ) strip and reaction setup.

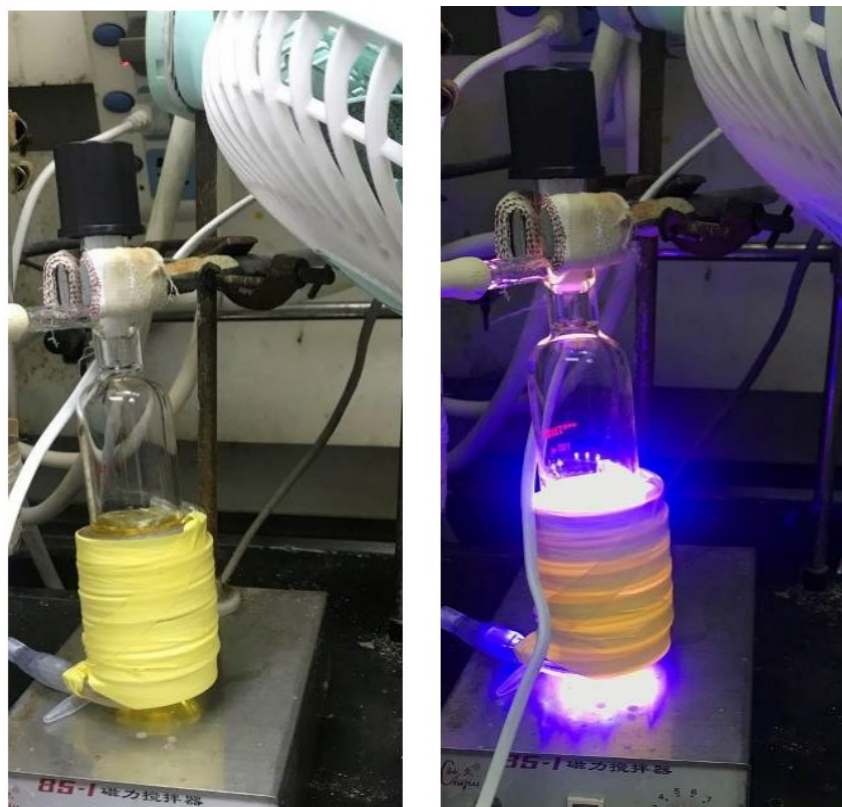

**Figure S2.** Reaction setup for scale-up synthesis.

As depicted in the pictures, the reactions were carried out in oven-dried sealed tubes. Each reaction setup is equipped with a fan to maintain the reaction temperature. The range of light source wavelength is 450-470 nm.

### (3) Optimization of Reaction Conditions.

**Table S1.** Optimization of the Photocatalyst.

**1a** **2a**

| Entry <sup>a</sup> | Photocatalyst                                                           | E <sub>T</sub> (kcal/mol) | Yield (%) <sup>b</sup> |
|--------------------|-------------------------------------------------------------------------|---------------------------|------------------------|
| 1                  | [Ir(dtbbpy)[dF(CF <sub>3</sub> )ppy] <sub>2</sub> PF <sub>6</sub>       | 60.8                      | 97                     |
| 2                  | fac-Ir(ppy) <sub>3</sub>                                                | 57.8                      | < 5                    |
| 3                  | [Ru(bpy) <sub>3</sub> ](PF <sub>6</sub> ) <sub>2</sub>                  | 46.5                      | < 5                    |
| 4                  | [Ru(bpz) <sub>3</sub> ](PF <sub>6</sub> ) <sub>2</sub>                  | 48.4                      | < 5                    |
| 5                  | [Ir(ppy) <sub>2</sub> (4,4'-dtb-bpy)]PF <sub>6</sub>                    | 49.2                      | < 5                    |
| 6                  | [Ru(phen) <sub>3</sub> ](PF <sub>6</sub> ) <sub>2</sub>                 | 48.4                      | < 5                    |
| 7                  | Xanthone                                                                | 74.3                      | < 5                    |
| 8                  | Thioxanthene                                                            | 63.4                      | < 5                    |
| 9                  | [Ir(2',4'-dF-5-CF <sub>3</sub> -ppy) <sub>2</sub> (bpy)]PF <sub>6</sub> | 60.4                      | 92                     |
| 10                 | Ir(dFppy) <sub>2</sub> pic                                              | 61.1                      | 95                     |

<sup>a</sup> **1a** (0.2 mmol), and PC (0.004 mmol, 2.0 mol%) in solvent (4.0 mL) at 25 °C, 8 W blue LEDs. <sup>b</sup> Determined by <sup>1</sup>H-NMR spectroscopy of crude reaction mixtures with 1,3,5-trimethoxybenzene as an internal standard.

**Table S2.** Optimization of the Solvent.
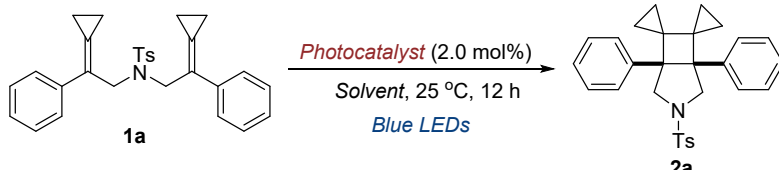

| Entry <sup>a</sup> | Photocatalyst                                                     | Solvent           | Yield (%) <sup>b</sup> |
|--------------------|-------------------------------------------------------------------|-------------------|------------------------|
| 1                  | [Ir(dtbbpy)[dF(CF <sub>3</sub> )ppy] <sub>2</sub> PF <sub>6</sub> | MeCN              | 97                     |
| 2                  | [Ir(dtbbpy)[dF(CF <sub>3</sub> )ppy] <sub>2</sub> PF <sub>6</sub> | THF               | 81                     |
| 3                  | [Ir(dtbbpy)[dF(CF <sub>3</sub> )ppy] <sub>2</sub> PF <sub>6</sub> | DCE               | 96                     |
| 4                  | [Ir(dtbbpy)[dF(CF <sub>3</sub> )ppy] <sub>2</sub> PF <sub>6</sub> | Toluene           | 55                     |
| 5                  | [Ir(dtbbpy)[dF(CF <sub>3</sub> )ppy] <sub>2</sub> PF <sub>6</sub> | Et <sub>2</sub> O | 80                     |
| 6                  | [Ir(dtbbpy)[dF(CF <sub>3</sub> )ppy] <sub>2</sub> PF <sub>6</sub> | DMSO              | 60                     |
| 7                  | [Ir(dtbbpy)[dF(CF <sub>3</sub> )ppy] <sub>2</sub> PF <sub>6</sub> | DCM               | 71                     |
| 8                  | [Ir(dtbbpy)[dF(CF <sub>3</sub> )ppy] <sub>2</sub> PF <sub>6</sub> | DMF               | 57                     |

<sup>a</sup> **1a** (0.2 mmol), and PC (0.004 mmol, 2.0 mol%) in solvent (4.0 mL) at 25 °C, 8 W blue LEDs. <sup>b</sup> Determined by <sup>1</sup>H-NMR spectroscopy of crude reaction mixtures with 1,3,5-trimethoxybenzene as an internal standard.

**Table S3.** Optimization of the Employed Amount of Photocatalyst.
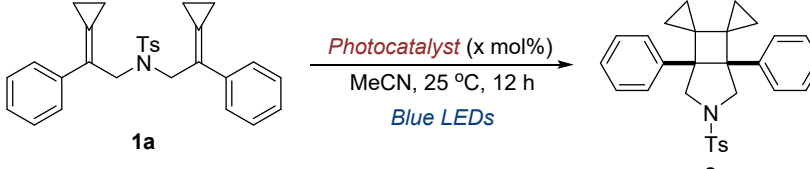

| Entry          | Photocatalyst                                                                | Yield (%) <sup>b</sup> |
|----------------|------------------------------------------------------------------------------|------------------------|
| 1              | [Ir(dtbbpy)[dF(CF <sub>3</sub> )ppy] <sub>2</sub> PF <sub>6</sub> (2.0 mol%) | 97                     |
| 2              | [Ir(dtbbpy)[dF(CF <sub>3</sub> )ppy] <sub>2</sub> PF <sub>6</sub> (1.5 mol%) | 96                     |
| 3              | [Ir(dtbbpy)[dF(CF <sub>3</sub> )ppy] <sub>2</sub> PF <sub>6</sub> (1.0 mol%) | 91                     |
| 4              | [Ir(dtbbpy)[dF(CF <sub>3</sub> )ppy] <sub>2</sub> PF <sub>6</sub> (0.5 mol%) | 81                     |
| 5              | -                                                                            | 0                      |
| 6 <sup>c</sup> | [Ir(dtbbpy)[dF(CF <sub>3</sub> )ppy] <sub>2</sub> PF <sub>6</sub> (2.0 mol%) | 0                      |

<sup>a</sup> **1a** (0.2 mmol), and PC (x mol%) in solvent (4.0 mL) at 25 °C, 12 h, 8 W blue LEDs.

<sup>b</sup> Determined by <sup>1</sup>H-NMR spectroscopy of crude reaction mixtures with 1,3,5-trimethoxybenzene as an internal standard. <sup>c</sup> Under dark conditions.

## (4) General Procedure for the Preparation of Starting Materials.

### 4.1 General Procedure for the Synthesis of Compounds 1a-1s.

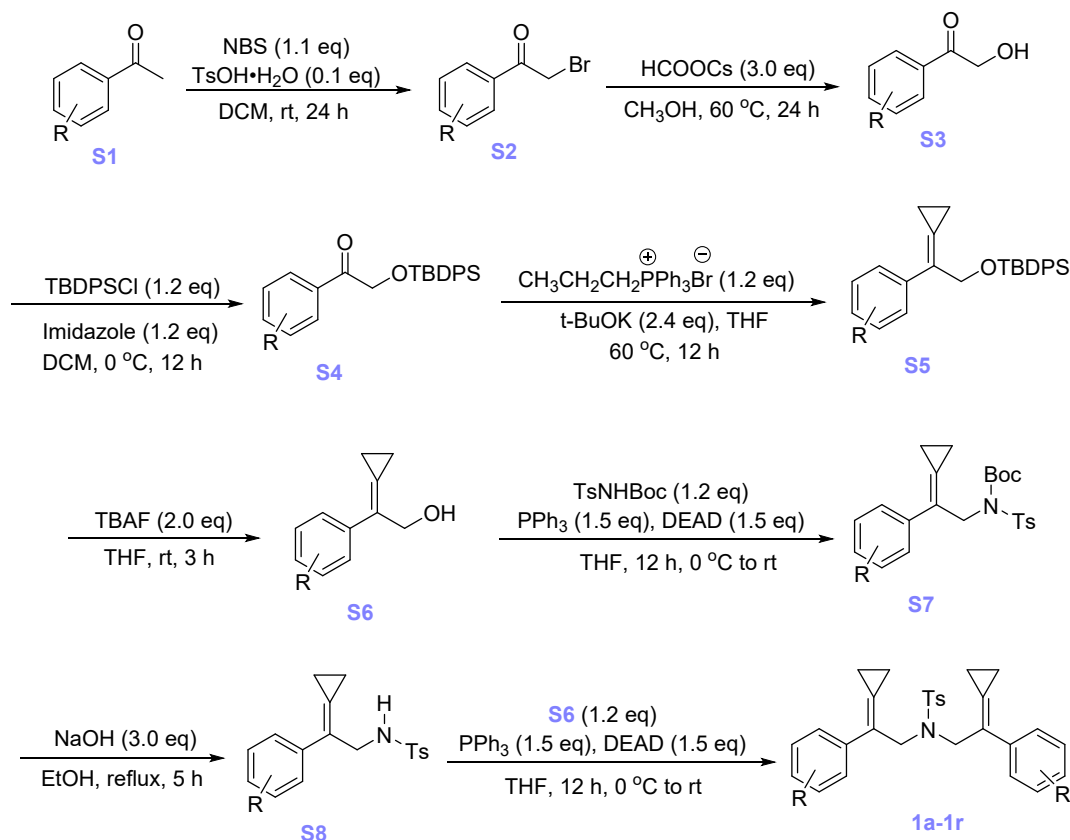

#### Compound S1 to Compound S2:

A solution of **S1** (30.0 mmol) and TsOH·H<sub>2</sub>O (3.0 mmol) in CH<sub>2</sub>Cl<sub>2</sub> (100.0 mL) was stirred at room temperature. Then, *N*-bromosuccinimide (33.0 mmol) is gradually added. After stirring at room temperature for 24 hours, the starting material disappeared as evidenced by TLC and was quenched by the addition of water. The combined organic layers were washed with brine and dried over anhydrous Na<sub>2</sub>SO<sub>4</sub>. The solvent was removed under vacuum and the residue was purified by a flash column chromatography on silica gel (eluent: petroleum ether / ethyl acetate = 10 / 1) to afford the products **S2** in moderate yields.

#### Compound S2 to Compound S3:

A solution of **S2** (25.0 mmol) and cesium formate (HCO<sub>2</sub>Cs, 3.0 equiv) in dry MeOH (80.0 mL) was heated under reflux for 24 hours. When the reaction was completed, the reaction mixture was washed by water and extracted with CH<sub>2</sub>Cl<sub>2</sub> for 3 times. The combined organic layers were washed with brine and dried over anhydrous Na<sub>2</sub>SO<sub>4</sub>. The solvent was removed under vacuum and the residue was used

directly into the next reaction without further purification.<sup>[1]</sup>

#### **Compound S3 to Compound S4:**

*Tert*-Butylchlorodiphenylsilane (30.0 mmol) was added dropwise to a stirred solution of **S3** and imidazole (30.0 mmol) in CH<sub>2</sub>Cl<sub>2</sub> (50.0 mL) at 0 °C under argon. Then, the resulting mixture was stirred at 0 °C for 12 hours. The reaction mixture was treated with water and extracted with CH<sub>2</sub>Cl<sub>2</sub>. The organic layer was separated, dried over anhydrous Na<sub>2</sub>SO<sub>4</sub> and the solvents was partially evaporated in vacuo. The solvent was completely removed under vacuum and the residue was purified by a flash column chromatography on silica gel (eluent: petroleum ether / ethyl acetate = 20 / 1) to afford the products **S4** in moderate yields.<sup>[2]</sup>

#### **Compound S4 to Compound S5:**

A solution of 3-bromopropyltriphenylphosphonium bromide (24.0 mmol) and *tert*-BuOK (48.0 mmol) in dry THF (30.0 mL) was stirred at 60 °C in an oil bath under argon for 0.5 h. Afterward compound **S4** (20.0 mmol) in dry THF (30.0 mL) was added and the reaction solution was stirred at 60 °C in an oil bath for another 12 hours. Upon completion, the reaction mixture was cooled to room temperature and the mixture was filtered through a celite. The filtrate was concentrated under reduced pressure and the residue was purified by a silica gel flash column chromatography (eluent: petroleum ether / ethyl acetate = 80 / 1) to afford the products **S5** in moderate yields.

#### **Compound S5 to Compound S6:**

To a solution of **S5** (15.0 mmol) in THF (20.0 mL) was added a 1.0 M solution of TBAF in THF (30.0 mL, 30.0 mmol) at room temperature. The resulting solution was stirred for 3 hours. The reaction mixture was evaporated in vacuo and the crude mixture was purified by a silica gel flash column chromatography (eluent: petroleum ether / ethyl acetate = 4 / 1) to afford the products **S6** in moderate yields.

#### **Compound S6 to Compound S7:**

*N*-Boc *p*-toluenesulfonamide (1.2 equiv) was dissolved in dry THF (20.0 mL) and triphenylphosphine (1.5 equiv) was added. The reaction solution was stirred under argon atmosphere and the **S6** (10.0 mmol, 1.0 equiv) was added. Immediately afterward, diethyl azodicarboxylate (12.0 mmol, 1.2 equiv)

was added dropwise at 0 °C, and then the reaction mixture was naturally restored to room temperature for 12 hours. The reaction mixture was evaporated in vacuo and the crude mixture was purified by a silica gel flash column chromatography (eluent: petroleum ether / ethyl acetate = 10 / 1) to afford the products **S7** in moderate yields.<sup>[3]</sup>

#### Compound **S7** to Compound **S8**:

Product **S7** (8.0 mmol) was dissolved in ethanol (30.0 mL) and stirred continuously, then NaOH (3.0 equiv) was added and the resulting mixture was stirred under reflux for 3 hours. The starting material disappears as evidenced by TLC. The mixture was treated with water and extracted with CH<sub>2</sub>Cl<sub>2</sub>. The organic layer was separated, dried over anhydrous Na<sub>2</sub>SO<sub>4</sub> and the solvent was evaporated in vacuo and the residue was used directly into the next reaction without further purification.

#### Compound **S8** to **1a-1s**:

Compound **S8** (1.2 equiv) was dissolved in dry THF (8.0 mL) and triphenylphosphine (1.5 equiv) was added. The reaction solution was stirred under argon atmosphere and the compound **S6** (1.0 mmol, 1.0 equiv) was added. Immediately afterward, diethyl azodicarboxylate (1.2 equiv) was added dropwise at 0 °C, and then the reaction mixture was naturally restored to room temperature for 12 hours. The reaction mixture was evaporated in vacuo and the crude mixture was purified by a silica gel flash column chromatography (eluent: petroleum ether / ethyl acetate = 10 / 1) to afford the products **1a-1s** in moderate yields.

### 4.2 General Procedure for the Synthesis of Compounds **1t** and **1u**.

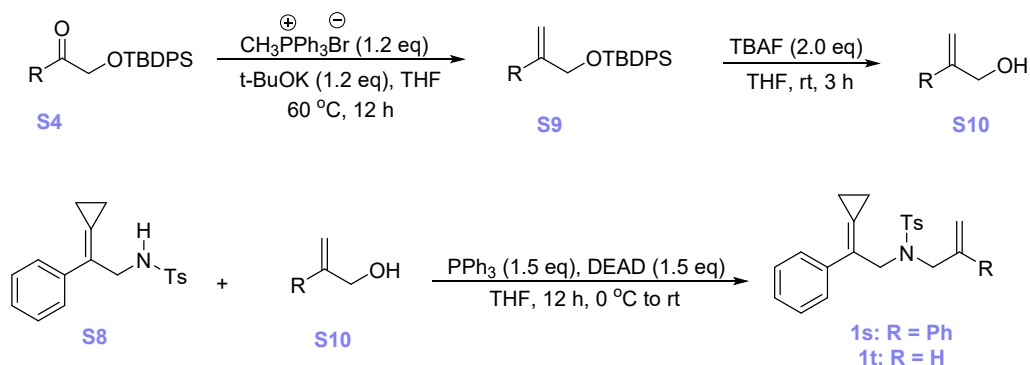

#### Compound **S4** to Compound **S9**:



A solution of methyltriphenylphosphine bromide (24.0 mmol) and *tert*-BuOK (24.0 mmol) in THF (30.0 mL) was stirred at 60 °C in an oil bath under argon for 0.5 h. Afterwards compound **S4** (20.0 mmol) in THF (30.0 mL) was added and the reaction solution was stirred at 60 °C in an oil bath for another 12 h. Upon completion, the reaction was cooled to room temperature and the mixture was filtered through a celite. The filtrate was concentrated under reduced pressure and the residue was purified by a silica gel flash column chromatography (eluent: petroleum ether / ethyl acetate = 80 / 1) to afford the products **S9** in moderate yields.

#### **Compound S9 to Compound S10:**

To a solution of **S9** (15.0 mmol) in THF (20.0 mL) was added a 1.0 M solution of TBAF in THF (30.0 mL, 30.0 mmol) at room temperature. The resulting solution was stirred for 3 h. The reaction mixture was evaporated in vacuo and the crude mixture was purified by a silica gel flash column chromatography (eluent: petroleum ether / ethyl acetate = 4 / 1) to afford the products **S10** in moderate yields.

#### **Compound S10 to 1t and 1u:**

Compound **S8** (1.2 eq) was dissolved in dry THF (8.0 mL) and triphenylphosphine (1.5 equiv) was added. The reaction solution was stirred under argon atmosphere and the compound **S10** (1.0 mmol, 1.0 equiv) was added. Immediately afterward, diethyl azodicarboxylate (1.2 equiv) was added dropwise at 0 °C, and then the reaction mixture was naturally restored to room temperature for 12 hours. The reaction mixture was evaporated in vacuo and the crude mixture was purified by a silica gel flash column chromatography (eluent: petroleum ether / ethyl acetate = 10 / 1) to afford the products **1t** and **1u** in moderate yields of 88% and 69%.

### **4.3 General Procedure for the Synthesis of Compounds 1v and 1w.**

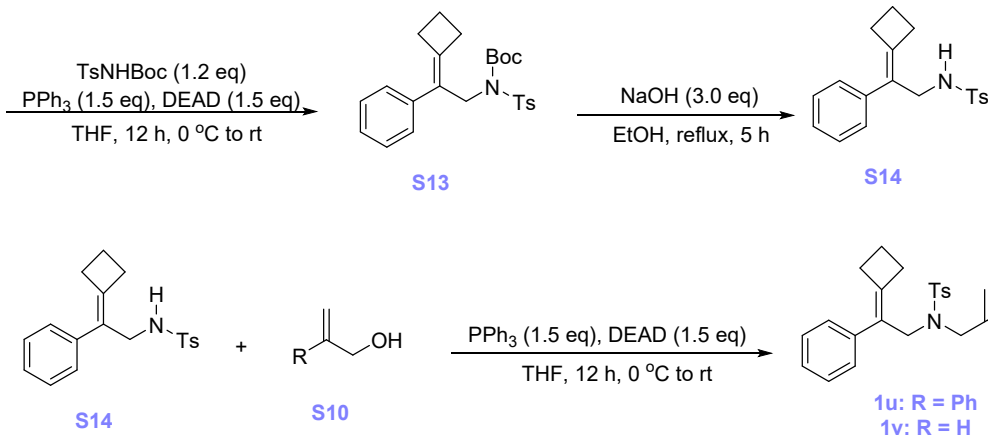

### Compound S4 to Compound S11:

A solution of butyltriphenyl-phosphoniubromide (24.0 mmol) and *tert*-BuOK (48.0 mmol) in THF (30.0 mL) was stirred at 60 °C in an oil bath under argon for 0.5 h. Afterward compound **S4** (20.0 mmol) in THF (30.0 mL) was added and the reaction solution was stirred at 60 °C in an oil bath for another 12 h. Upon completion, the reaction was cooled to room temperature and the mixture was filtered through a celite. The filtrate was concentrated under reduced pressure and the residue was purified by a silica gel flash column chromatography (eluent: petroleum ether / ethyl acetate = 80 / 1) to afford the products **S11** in moderate yields.

**Compound S11 to Compound S12:**

To a solution of **S11** (15.0 mmol) in THF (20.0 mL) was added a 1.0 M solution of TBAF in THF (30.0 mL, 30.0 mmol) at room temperature. The resulting solution was stirred for 3 h. The reaction mixture was evaporated in vacuo and the crude mixture was purified by a silica gel flash column chromatography (eluent: petroleum ether / ethyl acetate = 4 / 1) to afford the products **S12** in moderate yields.

### Compound S12 to Compound S13:

*N*-Boc p-toluenesulfonamide (1.2 equiv) was dissolved in dry THF (20.0 mL) and triphenylphosphine (1.5 equiv) was added. The resulting solution was stirred under argon atmosphere and the compound

**S12** (10.0 mmol, 1.0 equiv) was added. Immediately afterward, diethyl azodicarboxylate (12.0 mmol, 1.2 equiv) was added dropwise at 0 °C, and then the reaction mixture was naturally restored to room temperature for 12 hours. The reaction mixture was evaporated in vacuo and the crude mixture was purified by a silica gel flash column chromatography (eluent: petroleum ether / ethyl acetate = 10 / 1) to afford the products **S13** in moderate yields.

#### **Compound S13 to Compound S14:**

Product **S13** (8.0 mmol) was dissolved in ethanol (30.0 mL) and stirred continuously, then NaOH (3.0 equiv) was added and the reaction mixture was stirred under reflux for 3 hours. The starting material disappeared as evidenced by TLC. Then, the reaction mixture was treated with water and extracted with CH<sub>2</sub>Cl<sub>2</sub>. The organic layer was separated, dried over anhydrous Na<sub>2</sub>SO<sub>4</sub> and the solvent was evaporated in vacuo and the residue was used directly into the next reaction without further purification.

#### **Compound S14 to 1v and 1w:**

Compound **S14** (1.2 equiv) was dissolved in dry THF (8.0 mL) and triphenylphosphine (1.5 equiv) was added. The reaction solution was stirred under argon atmosphere and the compound **S10** (1.0 mmol, 1.0 equiv) was added. Immediately afterward, diethyl azodicarboxylate (1.2 equiv) was added dropwise at 0 °C, and then the reaction mixture was naturally restored to room temperature for 12 hours. The reaction mixture was evaporated in vacuo and the crude mixture was purified by a silica gel flash column chromatography (eluent: petroleum ether / ethyl acetate = 10 / 1) to afford the products **1v** and **1w** in moderate yields of 86% and 75%.

#### **4.4 General Procedure for the Synthesis of Compounds 1x and 1y.**

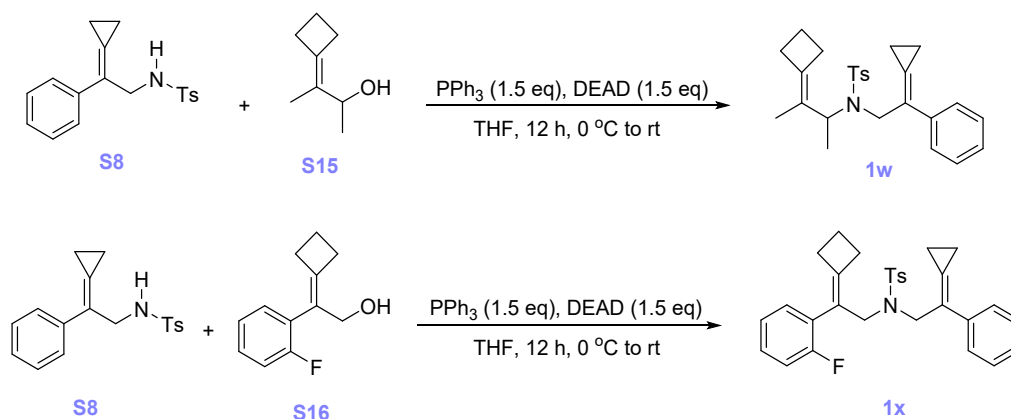

#### Compound **S8** to **1x** and **1y**:

Compound **S8** (1.2 equiv) was dissolved in dry THF (8.0 mL) and triphenylphosphine (1.5 equiv) was added. The solution mixture was stirred under argon atmosphere and the compound **S15** or **S16** (1.0 mmol, 1.0 equiv) was added. Immediately afterward, diethyl azodicarboxylate (1.2 equiv) was added dropwise at 0 °C, and then the reaction mixture was naturally restored to room temperature for 12 hours. The reaction mixture was evaporated in vacuo and the crude mixture was purified by a silica gel flash column chromatography (eluent: petroleum ether / ethyl acetate = 10 / 1) to afford the products **1x** and **1y** in good yields of 81% and 89%.

#### 4.5 General Procedure for the Synthesis of Compound **1z**.

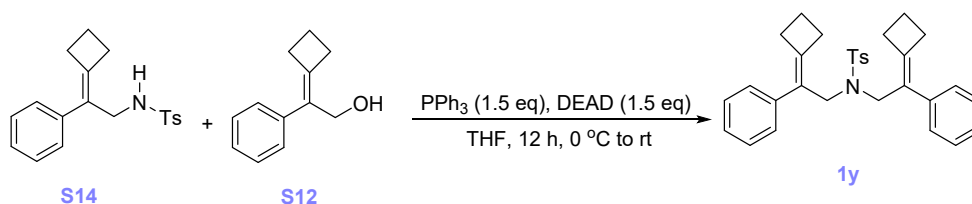

#### Compound **S14** to Compound **1z**:

Compound **S14** (1.2 equiv, 1.2 mmol) was dissolved in dry THF (8.0 mL) and triphenylphosphine (1.5 equiv) was added. The reaction solution was stirred under argon atmosphere and the compound **S12** (1.0 mmol, 1.0 equiv) was added. Immediately afterward, diethyl azodicarboxylate (1.2 equiv) was added dropwise at 0 °C, and then the reaction mixture was naturally restored to room temperature for 12 hours. The reaction mixture was evaporated in vacuo and the crude mixture was purified by a silica gel flash column chromatography (eluent: petroleum ether / ethyl acetate = 10 / 1) to afford the product **1z** in 83% yield.

#### 4.6 General Procedure for the Synthesis of Compound 1aa.

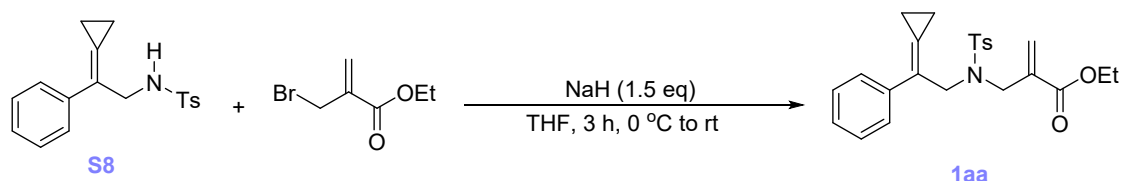

##### Compound S8 to Compound 1aa:

Compound **S8** (1.5 equiv, 1.5 mmol) was dissolved in dry THF (8.0 mL), and then NaH (1.5 equiv) was added at 0 °C. The reaction mixture was stirred for 5 min. Immediately afterward, 3-bromo-2-methyl-2-propenoic acid ethyl ester (1.0 equiv) was added at 0 °C, and then the reaction mixture was naturally restored to room temperature for 3 hours. The reaction mixture was evaporated in vacuo and the crude mixture was purified by a silica gel flash column chromatography (eluent: petroleum ether / ethyl acetate = 40 / 1) to afford the product **1aa** in 67% yield.

#### 4.7 General Procedure for the Synthesis of Compound 1ab.

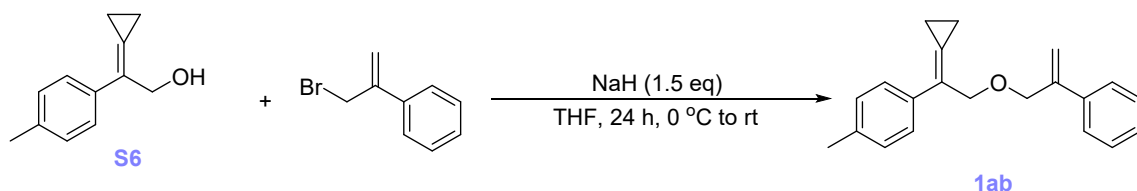

##### Compound S6 to Compound 1ab:

Compound **S6** (1.5 equiv, 1.5 mmol) was dissolved in dry THF (8.0 mL), and then NaH (1.5 equiv) was added at 0 °C. The reaction mixture was stirred for 5 min. Immediately afterward, (3-bromoprop-1-en-2-yl)benzene (1.0 equiv) was added at 0 °C, and then the reaction mixture was naturally restored to room temperature for 24 hours. The reaction mixture was evaporated in vacuo and the crude mixture was purified by a silica gel flash column chromatography (eluent: petroleum ether / ethyl acetate = 40 / 1) to afford the product **1ab** in 85% yield.

## (5) General Procedure for the Preparation of 2a – 2ab.

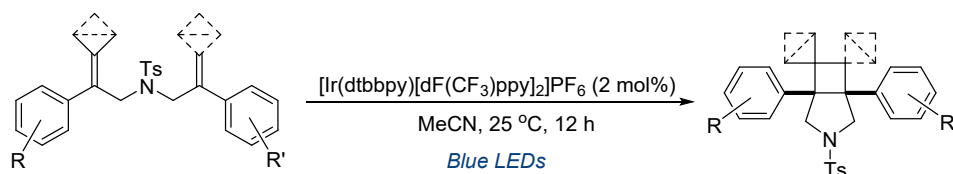

An oven-dried 5.0 mL sealed tube equipped with a Teflon septum and a magnetic stir bar was charged with the photocatalyst (0.004 mmol, 0.02 equiv, Ir[dF(CF<sub>3</sub>)ppy]<sub>2</sub>(dtbbpy)PF<sub>6</sub>), and the corresponding starting materials **1a-1z** (0.2 mmol). Then, 2.0 mL of degassed CH<sub>3</sub>CN was added via a syringe and the mixture was degassed via argon bubbling for 10 min. The reaction tube was sealed with a Teflon septum. Then, the vial was placed in blue light from an 8 W blue LEDs strip at room temperature (a fan was employed to maintain this temperature). After the indicated time period, the reaction mixture was evaporated in vacuo and the crude mixture was purified by a silica gel flash column chromatography (eluent: petroleum ether / ethyl acetate = 4 / 1) to afford the products in up to 95% yield.

## (6) Stern-Volmer Quenching Studies.

The measurements were performed using a 0.2 mM solution of photocatalyst  $\text{Ir}[\text{dF}(\text{CF}_3)\text{ppy}]_2(\text{dtbbpy})\text{PF}_6$  in 2.0 mL of degassed  $\text{CH}_3\text{CN}$  with varying concentrations of a quencher. The samples were excited at 400 nm and emission intensity was recorded from 425 nm to 575 nm for  $\text{Ir}[\text{dF}(\text{CF}_3)\text{ppy}]_2(\text{dtbbpy})\text{PF}_6$ . Experiments showed that the excited state  $\text{Ir}[\text{dF}(\text{CF}_3)\text{ppy}]_2(\text{dtbbpy})\text{PF}_6^*$  was quenched by **1a**.

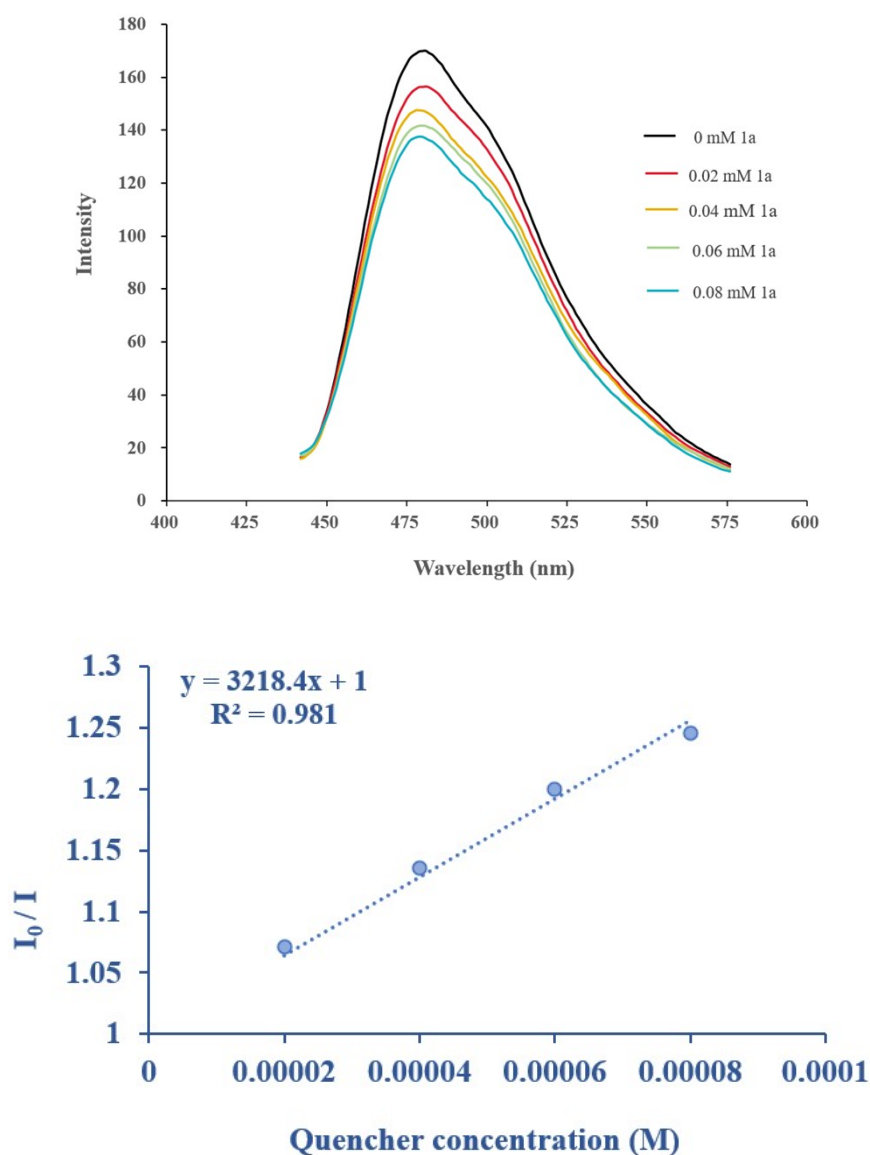

**Figure S3.**  $\text{Ir}[\text{dF}(\text{CF}_3)\text{ppy}]_2(\text{dtbbpy})\text{PF}_6$  emission quenching with substrate **1a**.

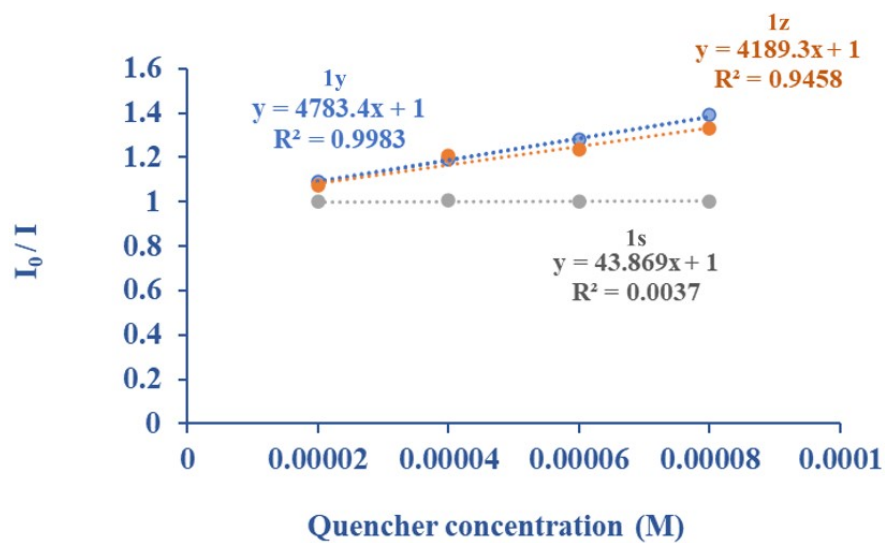

**Figure S4.**  $\text{Ir}[\text{dF}(\text{CF}_3)\text{ppy}]_2(\text{dtbbpy})\text{PF}_6$  emission quenching with substrates **1s**, **1y**, and **1z**.



## (7) Mechanistic Experiment.

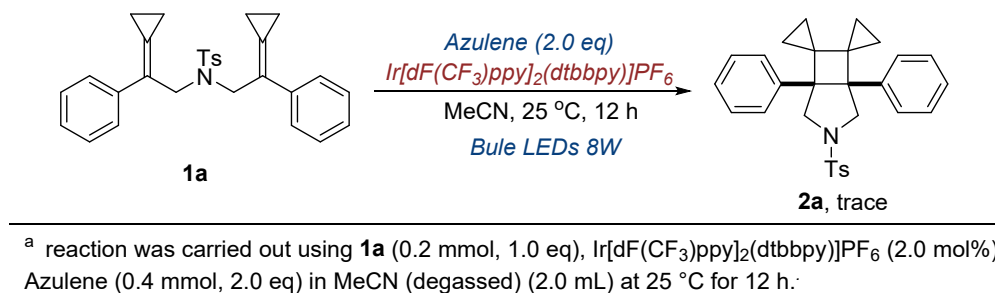

An oven-dried 5.0 mL sealed tube equipped with a Teflon septum and a magnetic stir bar was charged with the photocatalyst (0.004 mmol, 0.02 equiv, Ir[dF(CF<sub>3</sub>)ppy]<sub>2</sub>(dtbbpy)]PF<sub>6</sub>), and the corresponding starting materials **1a** (0.2 mmol) and azulene (2.0 equiv, 51.3 mg). Then, 2.0 mL of degassed CH<sub>3</sub>CN was added via a syringe and the mixture was degassed via argon bubbling for 10 min. The reaction tube was sealed with a Teflon septum. Then, the vial was placed in blue light from an 8 W blue LEDs strip at 25 °C for 12 hours. After the indicated time period, the reaction mixture was evaporated in vacuo and the crude mixture was purified by a silica gel flash column chromatography (eluent: petroleum ether / ethyl acetate = 4 / 1). The result showed that the **1a** remained unchanged and the expected product **2a** was not obtained.

## (8) Cyclic Voltammetry.

Cyclic voltammogram was recorded using a CHI660E potentiostat and a Pt working electrode (area = 0.03 cm<sup>2</sup>), an Ag/AgNO<sub>3</sub> reference electrode and a Pt sheet auxiliary electrode. The voltammogram was recorded at room temperature in 0.1 M tetrabutylammonium tetrafluoroborate in MeCN containing **1a** (0.05 mM). The scan rate was 100 mV s<sup>-1</sup>. Within the range of the diagram, no peaks of **1a** appeared. The oxidation potential of **1a** was determined as that **1a** = E<sub>p</sub><sup>ox</sup> > + 2.50 V vs Ag/AgNO<sub>3</sub>.

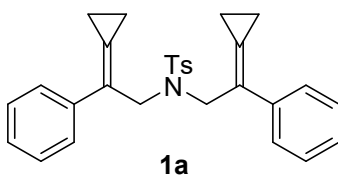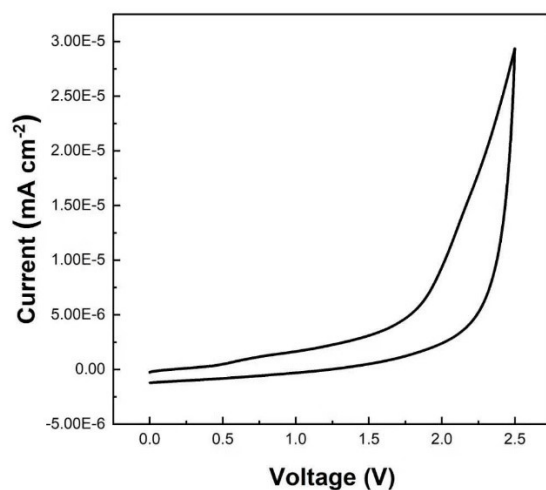

Figure S5. Cyclic voltammetry of **1a**

## (9) Transformation of the Product 2t.

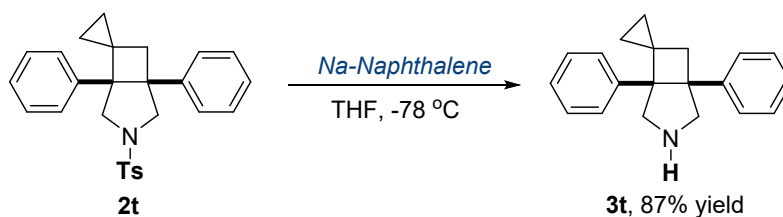

A solution 1 M of sodium naphthalide in THF was prepared as follows: to a stirred solution of naphthalene (5.0 g, 39.0 mmol) in 39 mL of THF, sodium metal (1.1 g, 47.0 mmol) was added under nitrogen atmosphere, and the solution was stirred for 1 h. A solution of **2t** (85.8 mg, 0.2 mmol) in anhydrous THF (4.0 mL) was cooled to -78 °C under nitrogen atmosphere and 1.0 mL (1.0 mmol) of 1 M sodium naphthalenide in THF was added dropwise. The mixture was stirred for 40 min at -78 °C and then 15.0 mL of saturated NH<sub>4</sub>Cl aqueous solution was added. The solution was left to warm up to room temperature and the aqueous layer was extracted with ethyl acetate. The organic layer was dried over anhydrous Na<sub>2</sub>SO<sub>4</sub>. Then the solvent was removed under reduced pressure and the residue was purified by a flash column chromatography (eluent: ethyl acetate / triethylamine = 25 / 1) to give the corresponding product **3t** (48.1 mg) in 87% yield.<sup>[4]</sup>

## (10) Scale-up Synthesis of **1j**.

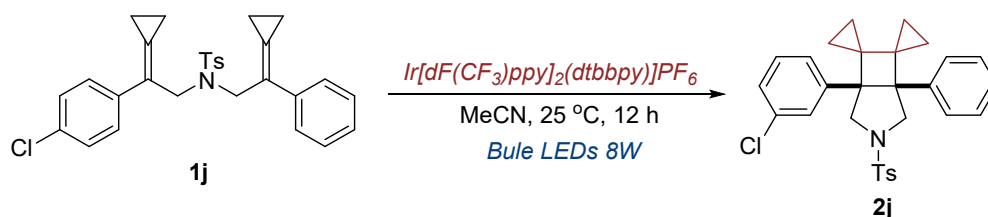

An oven-dried 100.0 mL sealed tube equipped with a Teflon septum and a magnetic stir bar was charged with the photocatalyst (44.88 mg, 0.04 mmol, 0.01 equiv,  $\text{Ir}[\text{dF}(\text{CF}_3)\text{ppy}]_2(\text{dtbbpy})\text{PF}_6$ ), and the corresponding starting materials **1j** (4 mmol, 1.96g). Then, 40.0 mL of degassed  $\text{CH}_3\text{CN}$  was added via a syringe and the reaction mixture was degassed via argon bubbling for 20 min. The reaction tube was sealed with a Teflon septum. Then, the vial was placed in blue light from an 8 W blue LEDs strip at 25 °C (a fan was employed to maintain this temperature) for 12 hours. After the indicated time period, the reaction mixture was evaporated in vacuo and the crude mixture was purified by a silica gel flash column chromatography (eluent: petroleum ether / ethyl acetate = 4 / 1) to afford the product **2j** in 84% yield (1.65 g).

## (11) Spectroscopic Data of Substrates and Products.

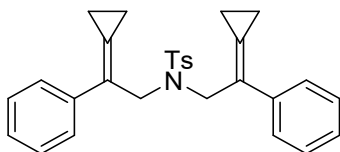

**Compound 1a:** Yield: 339 mg, 71%; A white solid; M.p.: 158 - 160 °C;  $^1\text{H}$  NMR (400 MHz,  $\text{CDCl}_3$ )  $\delta$  7.70 – 7.59 (m, 2H), 7.42 – 7.30 (m, 4H), 7.30 – 7.22 (m, 3H), 7.22 – 7.14 (m, 5H), 4.25 (s, 4H), 2.43 (s, 3H), 1.03 – 0.93 (m, 4H), 0.92 – 0.84 (m, 4H);  $^{13}\text{C}$  NMR (100 MHz,  $\text{CDCl}_3$ )  $\delta$  142.6, 138.2, 135.9, 129.1, 127.4, 126.9, 126.2, 126.1, 125.4, 121.6, 51.2, 21.1, 3.7, 1.4; IR (neat):  $\nu$  2916, 1709, 1496, 1446, 1333, 1247, 1159, 766, 690  $\text{cm}^{-1}$ ; HRMS (ESI - TOF) Calcd. for  $\text{C}_{29}\text{H}_{29}\text{NO}_2\text{SNa}$   $[\text{M}+\text{Na}]^+$ : 478.1811, Found: 478.1806.

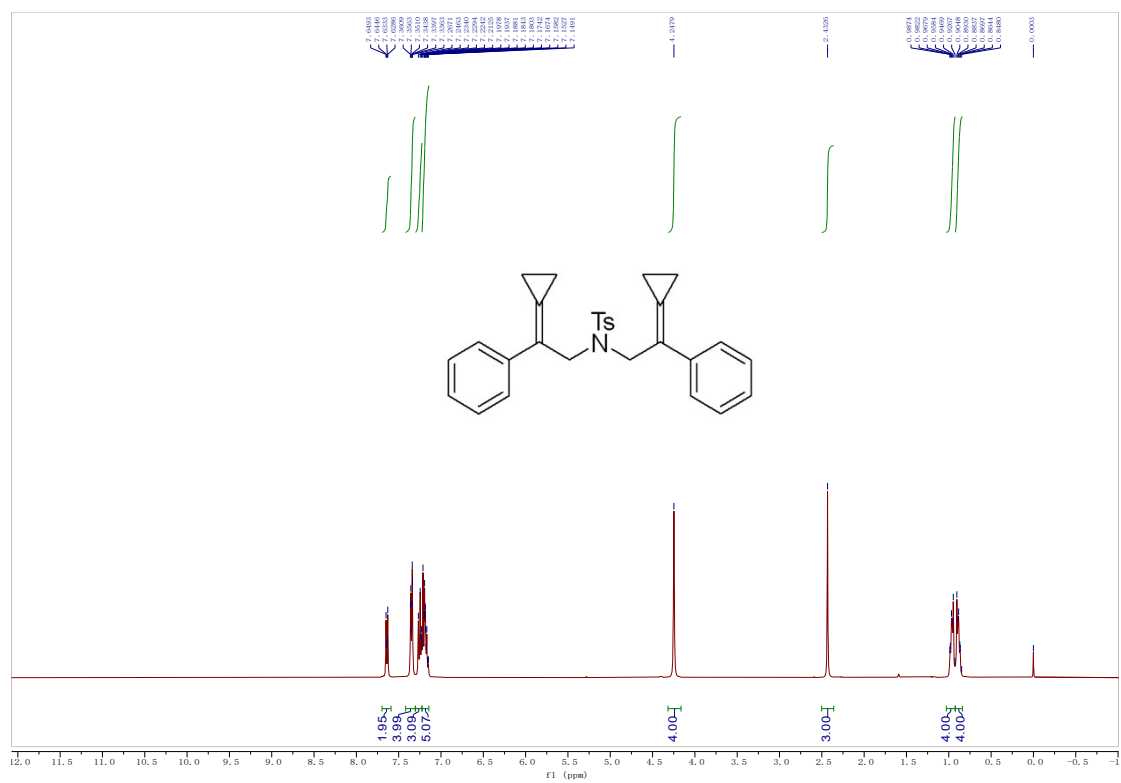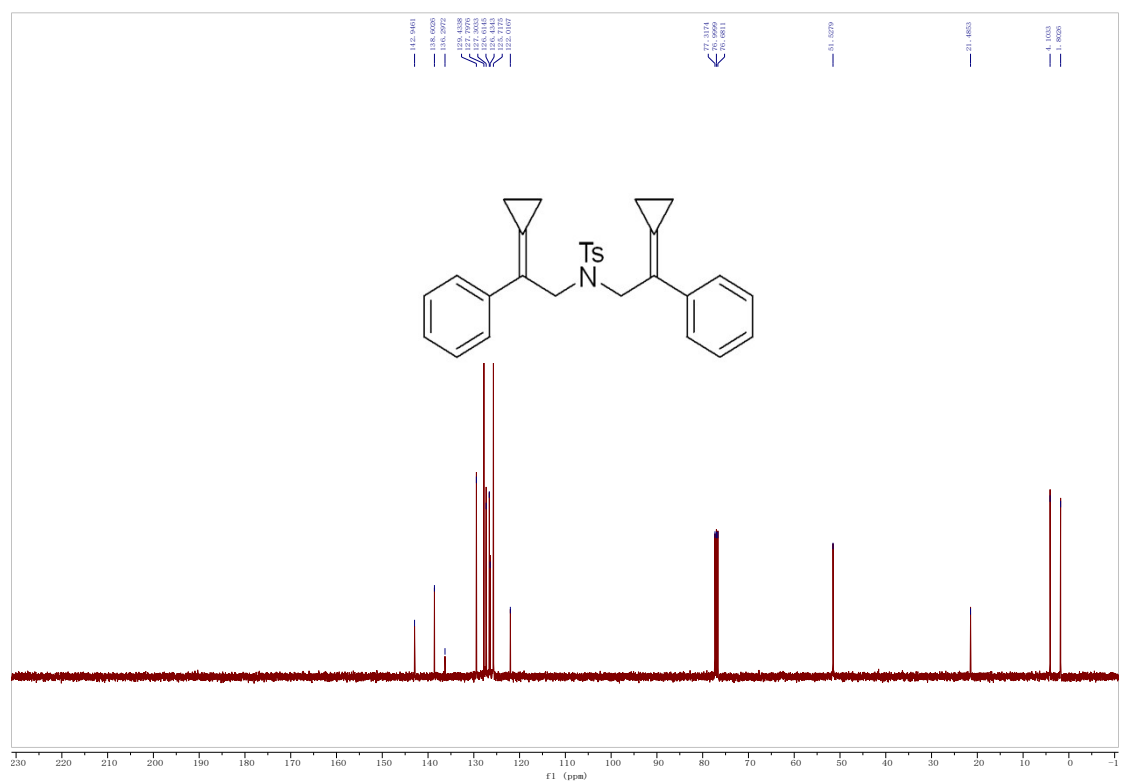

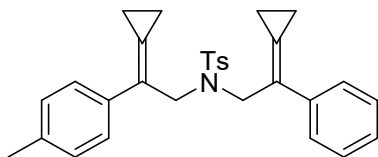

**Compound 1b:** Yield: 375 mg, 76%; A white solid; M.p.: 167 - 169 °C;  $^1\text{H}$  NMR (400 MHz,  $\text{CDCl}_3$ )  $\delta$  7.67 – 7.60 (m, 2H), 7.38 – 7.31 (m, 2H), 7.28 – 7.23 (m, 4H), 7.22 – 7.13 (m, 3H), 7.02 (d,  $J$  = 7.7 Hz, 2H), 4.24 (s, 2H), 4.23 (s, 2H), 2.43 (s, 3H), 2.31 (s, 3H), 0.98 – 0.85 (m, 8H);  $^{13}\text{C}$  NMR (100 MHz,  $\text{CDCl}_3$ )  $\delta$  142.9, 138.7, 136.5, 136.31, 135.8, 129.5, 128.6, 127.8, 127.3, 126.6, 126.3, 125.8, 125.7, 125.4, 122.1, 122.0, 51.52, 51.45, 21.5, 21.1, 4.1, 4.1, 1.9, 1.84; IR (neat):  $\nu$  2972, 1712, 1514, 1340, 1162, 1092, 1018, 752, 697 $\text{cm}^{-1}$ ; HRMS (ESI - TOF) Calcd. for  $\text{C}_{30}\text{H}_{31}\text{NO}_2\text{SNa}$   $[\text{M}+\text{Na}]^+$ : 492.1968, Found: 492.1969.

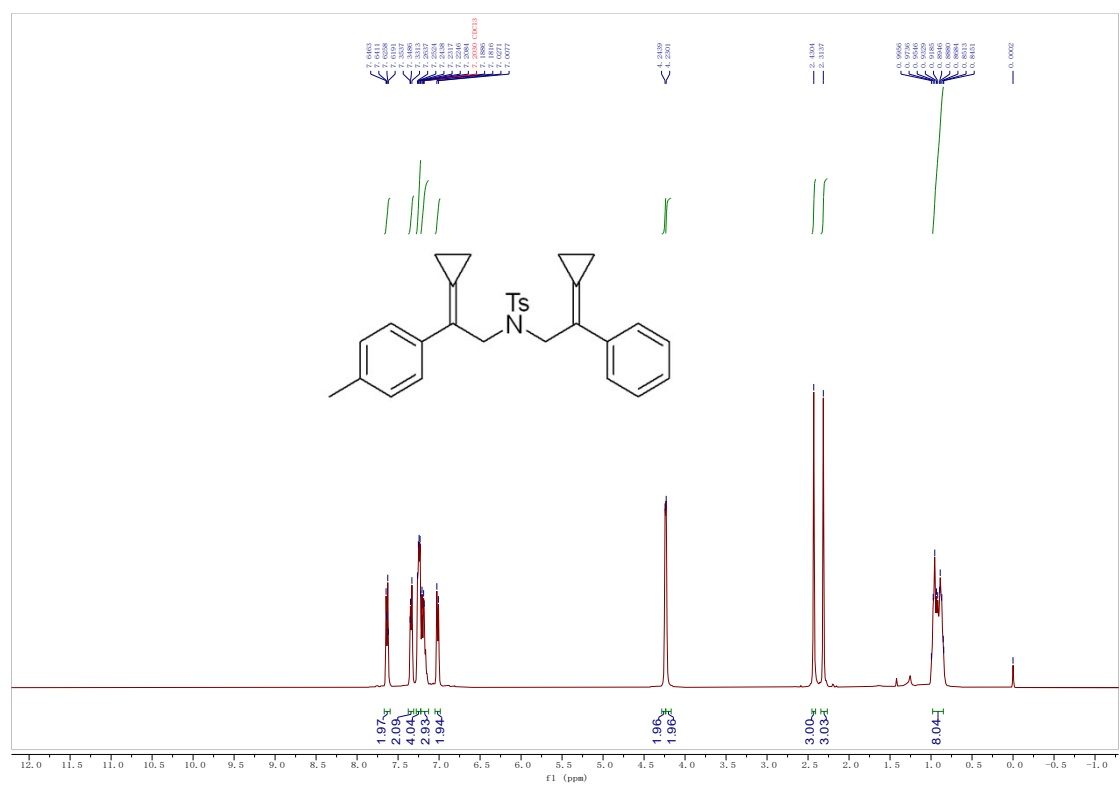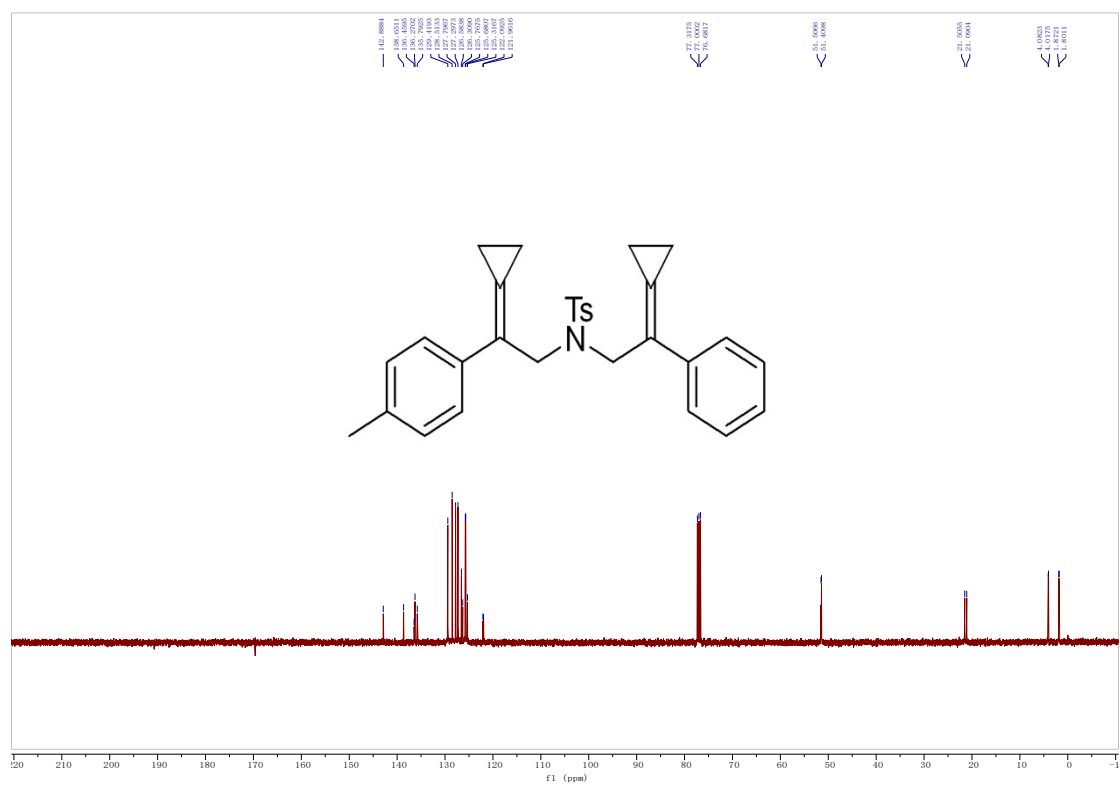



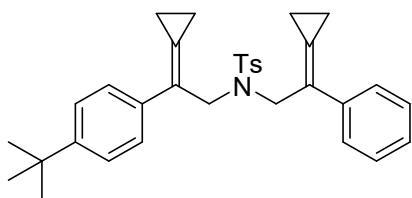

**Compound 1c:** Yield: 423 mg, 81%; A white solid; M.p.: 152 - 154 °C;  $^1\text{H}$  NMR (400 MHz,  $\text{CDCl}_3$ )  $\delta$  7.62 (d,  $J = 7.8$  Hz, 2H), 7.38 – 7.27 (m, 4H), 7.23 – 7.12 (m, 7H), 4.24 (s, 4H), 2.40 (s, 3H), 1.31 (s, 9H), 1.01 – 0.91 (m, 4H), 0.91 – 0.82 (m, 4H);  $^{13}\text{C}$  NMR (100 MHz,  $\text{CDCl}_3$ )  $\delta$  143.9, 139.7, 130.4, 128.8, 128.3, 127.5, 127.3, 126.7, 126.5, 126.4, 125.6, 123.0, 122.8, 52.7, 52.5, 35.4, 32.3, 22.5, 5.2, 5.0, 2.8, 2.6; IR (neat):  $\nu$  2965, 1341, 1106, 1092, 1047, 759, 697, 662  $\text{cm}^{-1}$ ; HRMS(ESI - TOF) Calcd. for  $\text{C}_{33}\text{H}_{37}\text{NO}_2\text{SNa}$   $[\text{M}+\text{Na}]^+$ : 534.2437, Found: 534.2434.

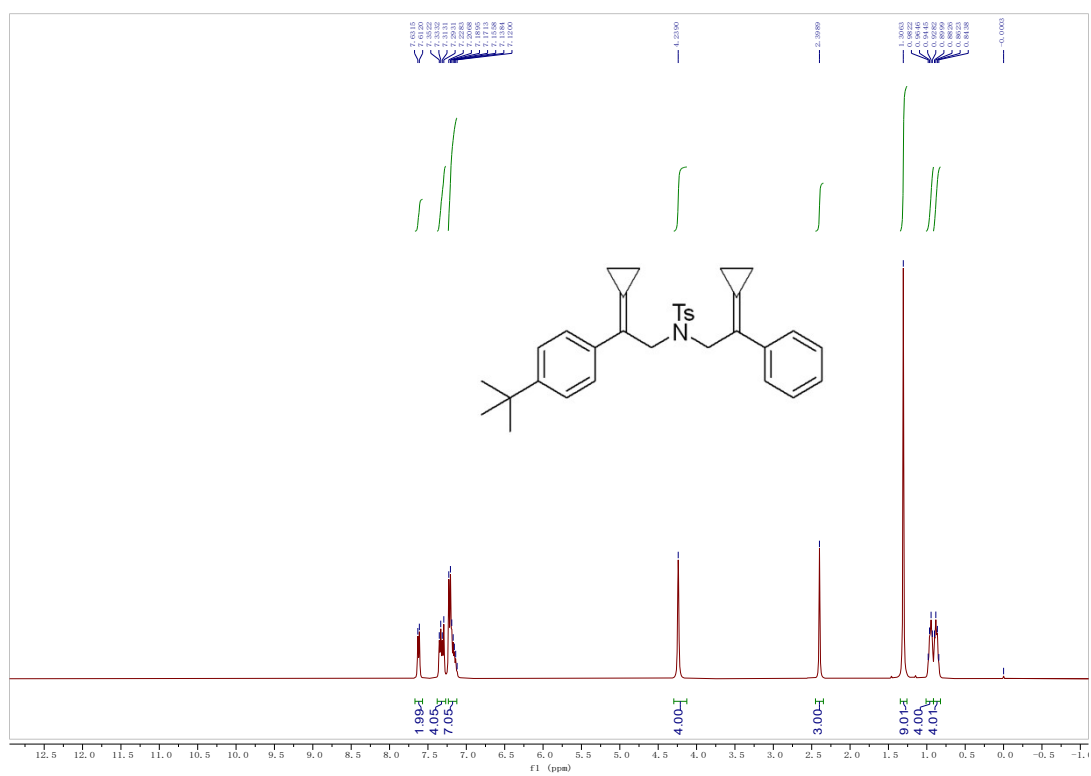

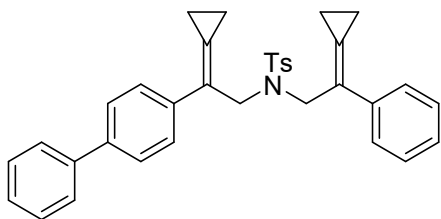

**Compound 1d:** Yield: 434 mg, 80%; A white solid; M.p.: 124 - 126 °C;  $^1\text{H}$  NMR (400 MHz,  $\text{CDCl}_3$ )  $\delta$  7.66 (d,  $J = 7.9$  Hz, 2H), 7.62 – 7.57 (m, 2H), 7.49 – 7.41 (m, 6H), 7.40 – 7.33 (m, 3H), 7.31 – 7.24 (m, 3H), 7.21 – 7.15 (m, 2H), 4.28 (s, 4H), 2.43 (s, 3H), 1.07 – 0.97 (m, 4H), 0.97 – 0.89 (m, 4H);  $^{13}\text{C}$  NMR (100 MHz,  $\text{CDCl}_3$ )  $\delta$  143.2, 140.9, 139.4, 138.8, 137.7, 136.3, 129.6, 128.9, 128.0, 127.5, 127.3, 127.0, 126.8, 126.8, 126.63, 126.59, 126.3, 125.9, 122.2, 121.9, 51.8, 51.7, 21.7, 4.5, 4.4, 2.04, 1.95; IR (neat):  $\nu$  2972, 1712, 1597, 1487, 1339, 1220, 1017, 964, 697, 656  $\text{cm}^{-1}$ ; HRMS(ESI - TOF) Calcd. for  $\text{C}_{35}\text{H}_{33}\text{NO}_2\text{SNa}$   $[\text{M}+\text{Na}]^+$ : 554.2124, Found: 554.2128.

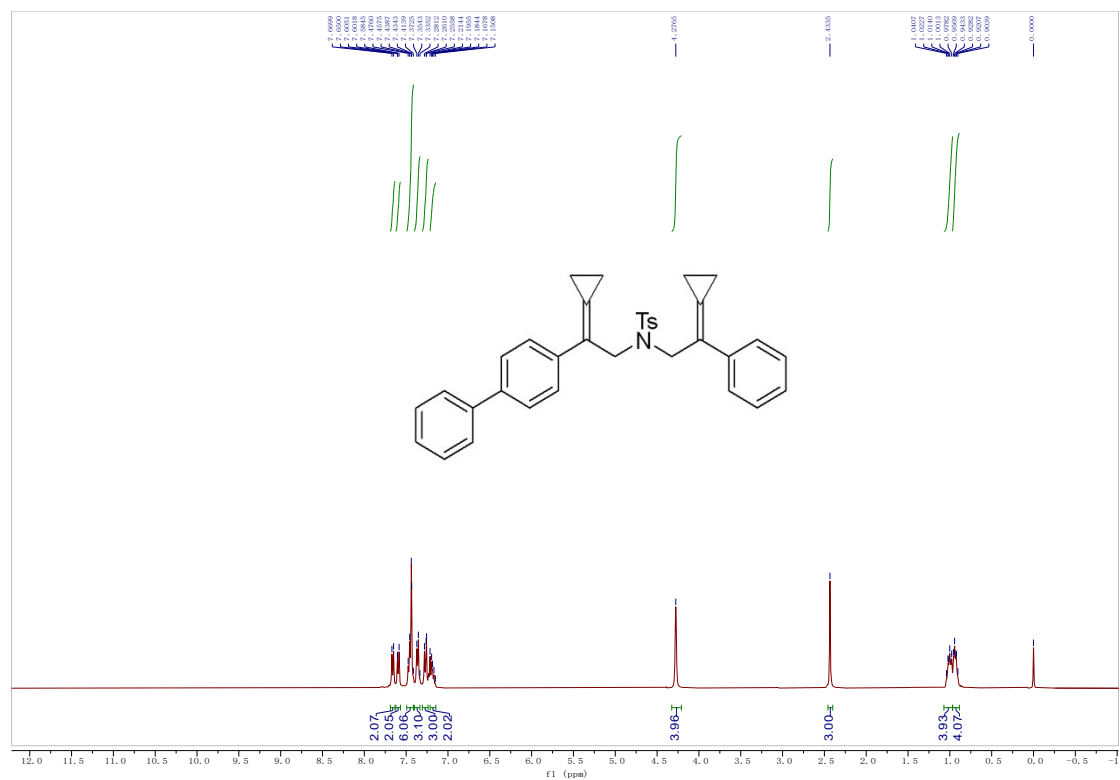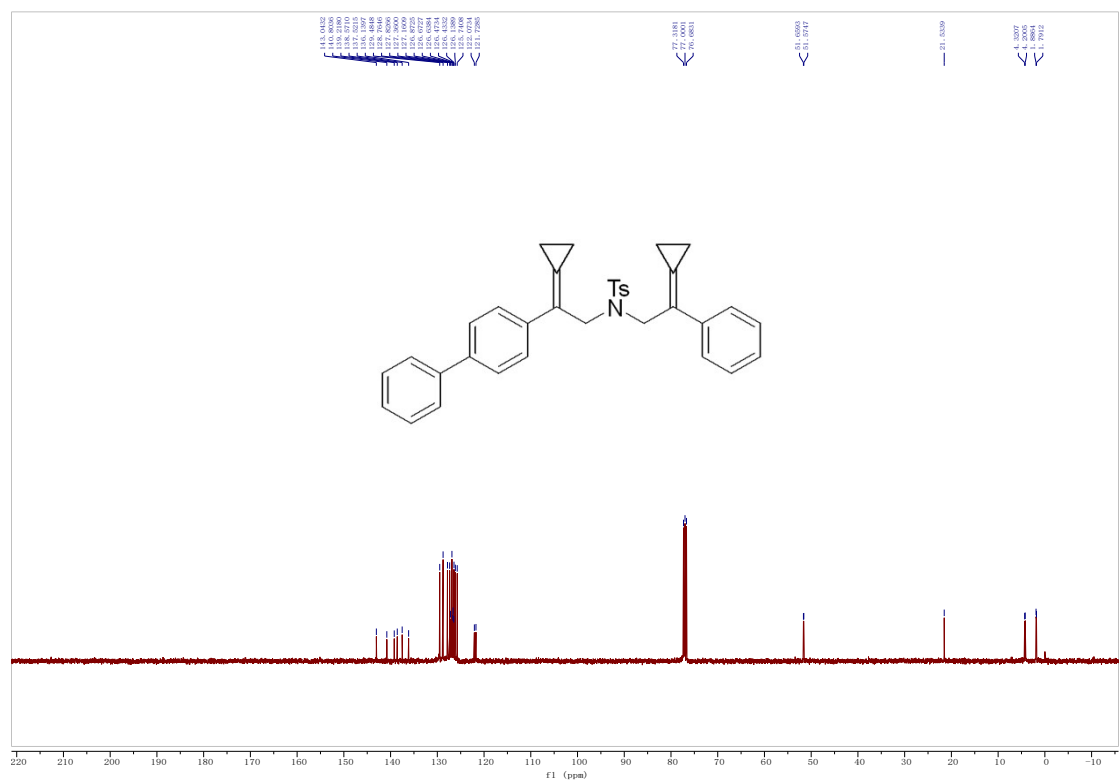

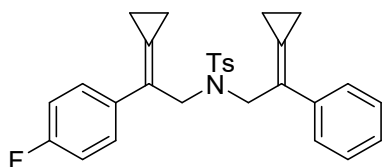

**Compound 1e:** Yield: 357 mg, 72%; A white solid; M.p.: 147 - 149 °C;  $^1\text{H}$  NMR (400 MHz,  $\text{CDCl}_3$ )  $\delta$  7.66 – 7.59 (m, 2H), 7.37 – 7.29 (m, 4H), 7.28 – 7.25 (m, 2H), 7.23 – 7.15 (m, 3H), 6.91 – 6.82 (m, 2H), 4.25 (s, 2H), 4.22 (s, 2H), 2.44 (s, 3H), 1.08 – 1.03 (m, 2H), 1.00 – 0.89 (m, 6H);  $^{13}\text{C}$  NMR (100 MHz,  $\text{CDCl}_3$ )  $\delta$  160.9, 158.4 (d,  $J = 244.5$  Hz), 141.1, 136.5, 134.1, 132.52, 132.49 (d,  $J = 3.4$  Hz), 127.5, 125.9, 125.47, 125.39 (d,  $J = 7.7$  Hz), 125.36, 124.7, 124.4, 124.1, 124.0 (d,  $J = 1.7$  Hz), 123.7, 120.2, 119.4, 112.7, 112.5 (d,  $J = 21.1$  Hz), 51.9, 51.6, 21.5, 4.3, 1.9, 1.8;  $^{19}\text{F}$  NMR (376 MHz,  $\text{CDCl}_3$ )  $\delta$  -115.8; IR (neat):  $\nu$  2973, 1597, 1450, 1337, 1229, 1093, 833, 709, 697  $\text{cm}^{-1}$ ; HRMS (ESI - TOF) Calcd. for  $\text{C}_{29}\text{H}_{28}\text{NO}_2\text{SFNa}$   $[\text{M}+\text{Na}]^+$ : 496.1717, Found: 496.1708.

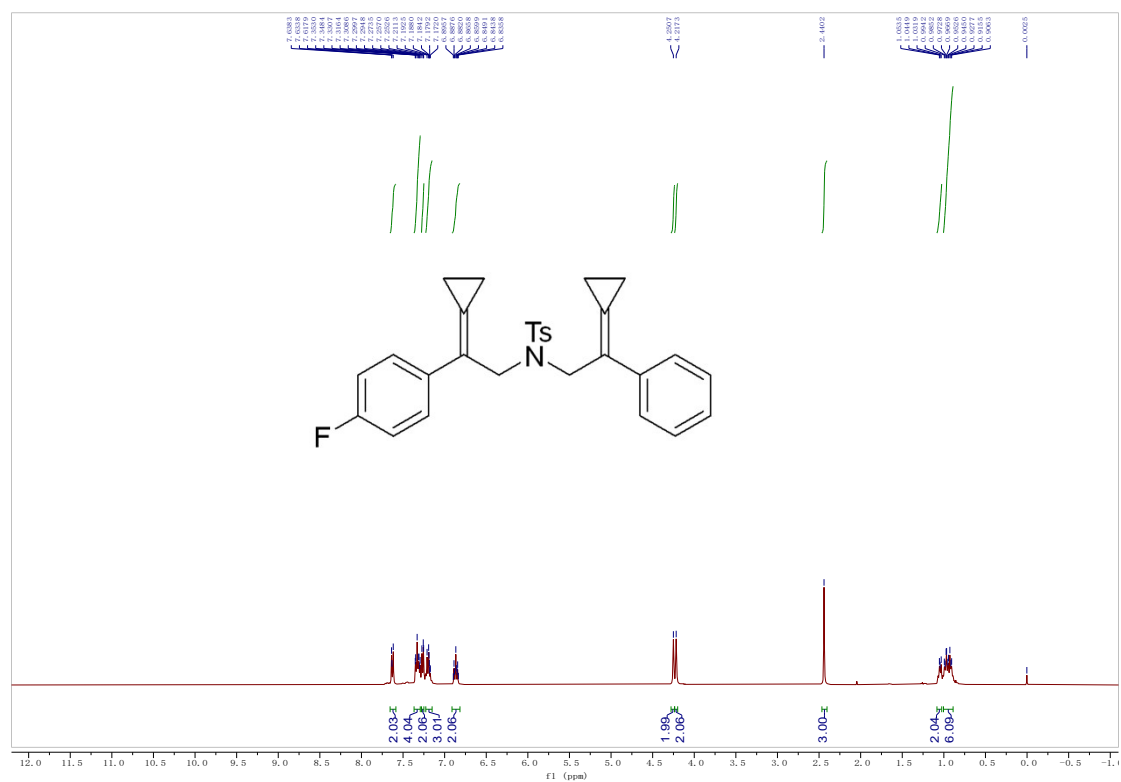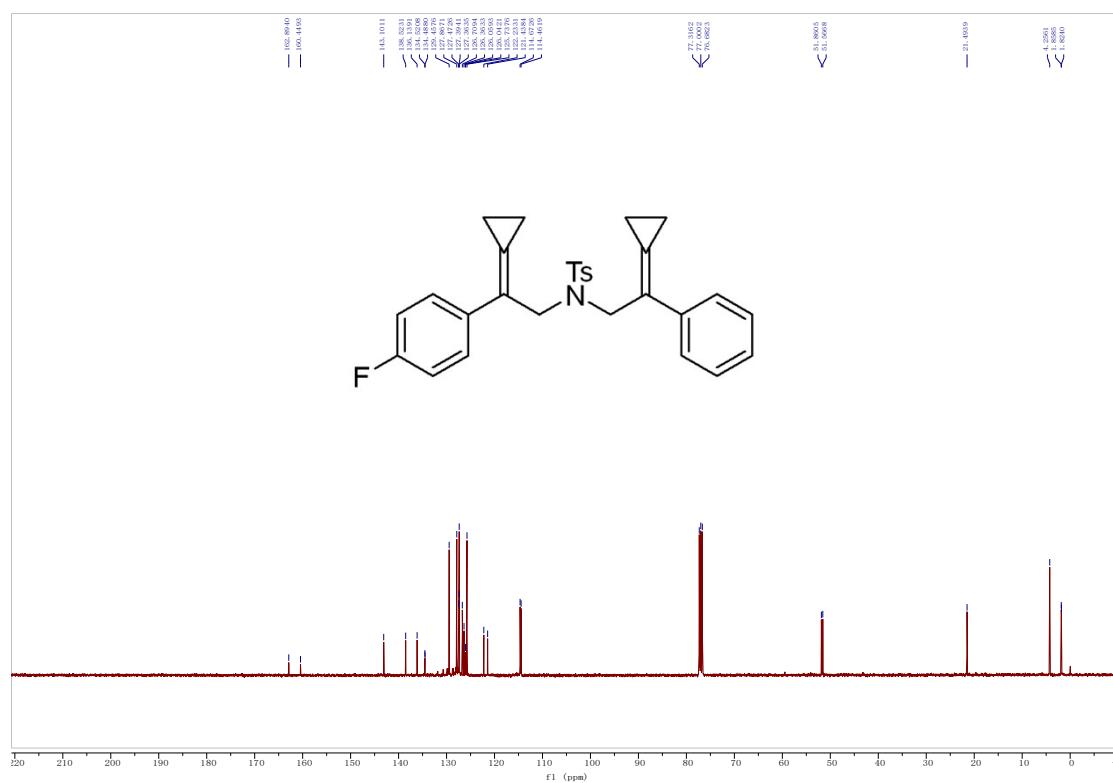

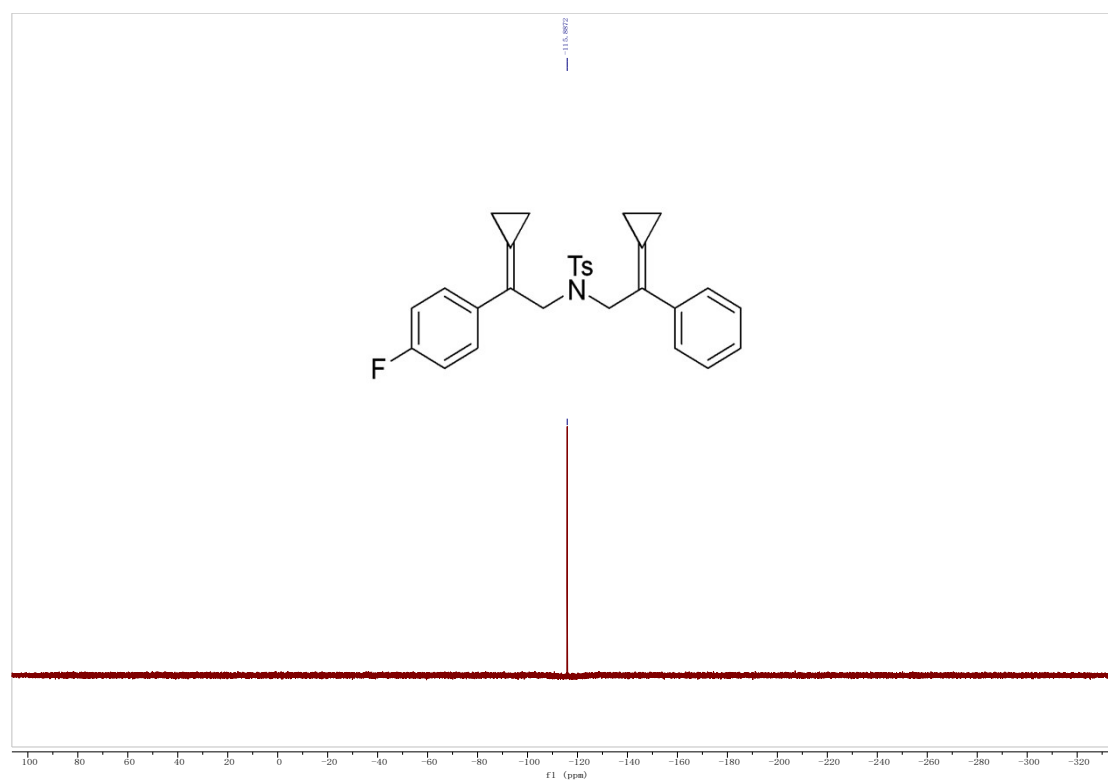

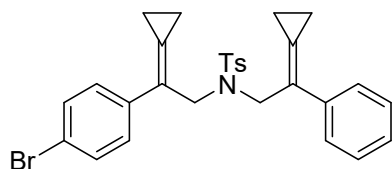

**Compound 1f:** Yield: 428 mg, 80%; A white solid; M.p.: 155 - 157 °C;  $^1\text{H}$  NMR (400 MHz,  $\text{CDCl}_3$ )  $\delta$  7.68 – 7.61 (m, 2H), 7.39 – 7.34 (m, 2H), 7.32 – 7.26 (m, 4H), 7.25 – 7.17 (m, 5H), 4.26 (s, 2H), 4.21 (s, 2H), 2.45 (s, 3H), 1.09 – 1.03 (m, 2H), 1.01 – 0.90 (m, 6H);  $^{13}\text{C}$  NMR (100 MHz,  $\text{CDCl}_3$ )  $\delta$  144.1, 139.3, 138.3, 136.9, 131.7, 130.5, 128.8, 128.4, 128.3, 128.1, 127.7, 127.4, 126.7, 123.1, 122.4, 121.4, 78.3, 78.0, 77.7, 52.6, 52.5, 22.5, 5.3, 2.8; IR (neat):  $\nu$  2967, 1766, 1347, 1161, 1090, 1008, 700, 663  $\text{cm}^{-1}$ ; HRMS (ESI - TOF) Calcd. for  $\text{C}_{29}\text{H}_{29}\text{NO}_2\text{SBr}$   $[\text{M}+\text{H}]^+$ : 534.1097, Found: 534.1094.



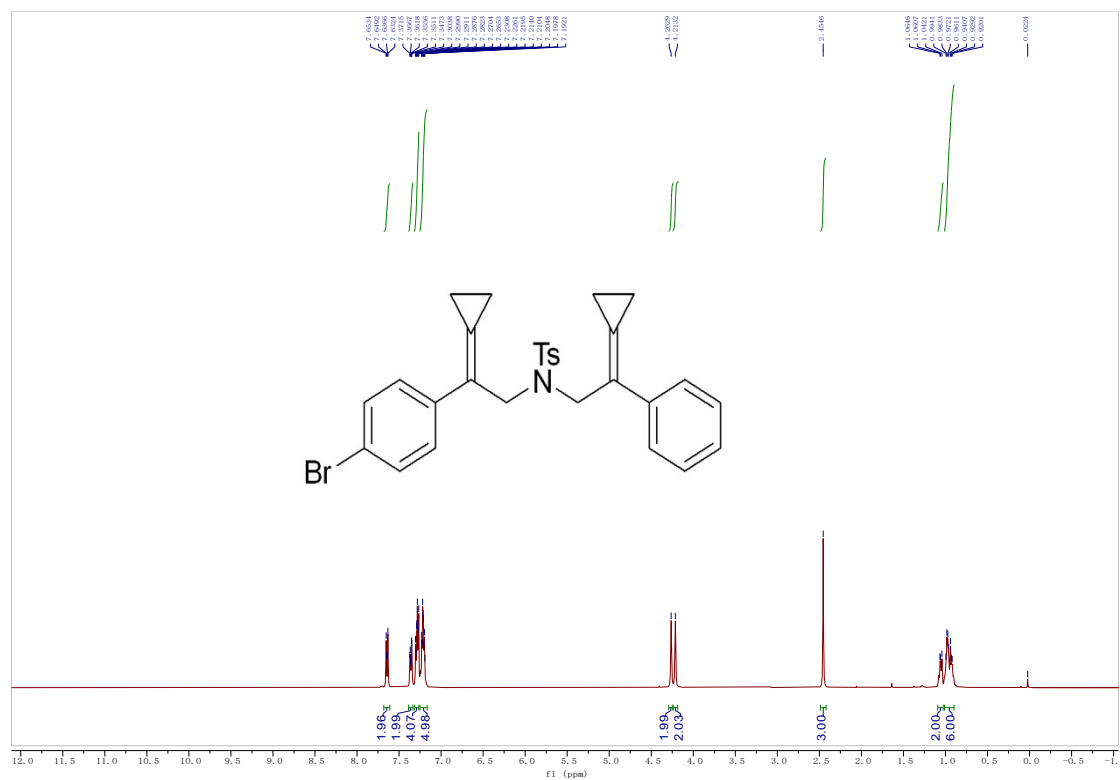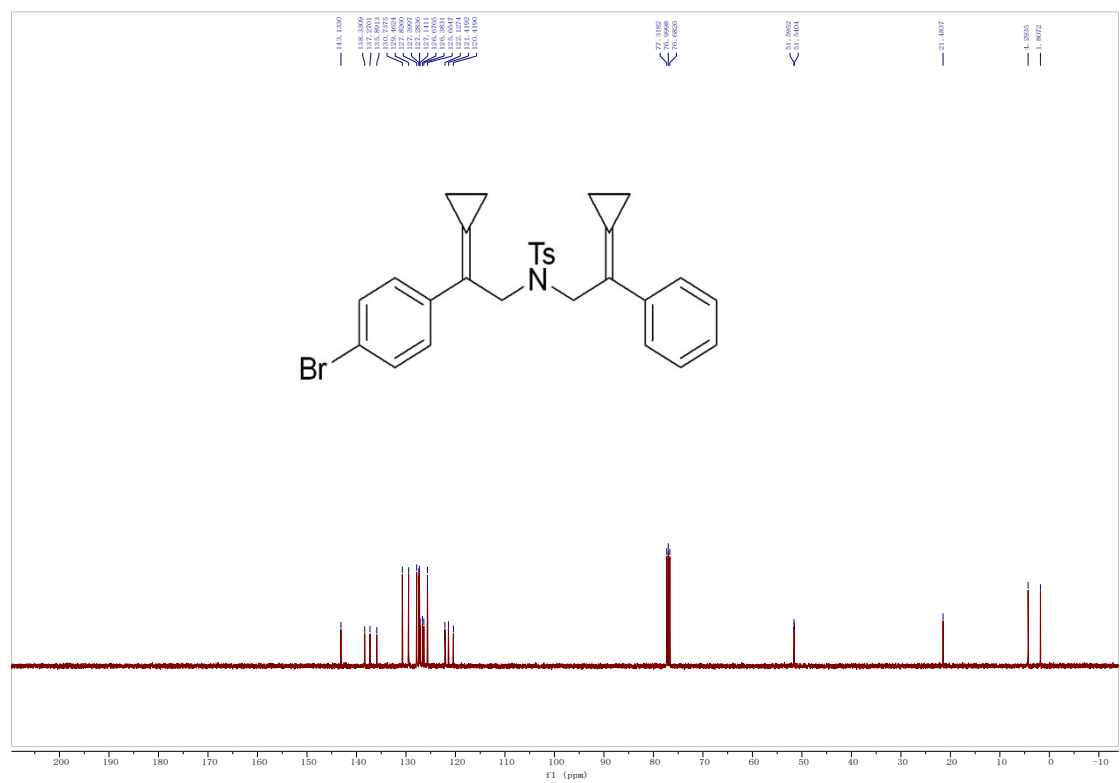

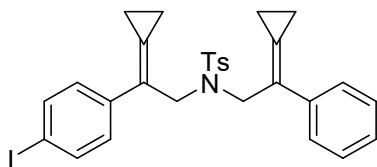

**Compound 1g:** Yield: 418 mg, 69%; A white solid; M.p.: 159 - 161 °C;  $^1\text{H}$  NMR (400 MHz,  $\text{CDCl}_3$ )  $\delta$  7.62 (d,  $J = 8.0$  Hz, 2H), 7.52 – 7.42 (m, 2H), 7.36 – 7.30 (m, 2H), 7.30 – 7.26 (m, 2H), 7.24 – 7.16 (m, 3H), 7.08 – 7.02 (m, 2H), 4.24 (s, 2H), 4.19 (s, 2H), 2.45 (s, 3H), 1.09 – 1.01 (m, 2H), 1.00 – 0.85 (m, 6H);  $^{13}\text{C}$  NMR (100 MHz,  $\text{CDCl}_3$ )  $\delta$  143.2, 138.4, 138.0, 136.8, 136.1, 129.5, 127.9, 127.7, 127.4, 127.3, 126.8, 126.5, 125.8, 122.3, 121.7, 92.0, 51.6, 51.5, 21.6, 4.4, 4.3, 1.9; IR (neat):  $\nu$  2928, 2076, 1733, 1718, 1495, 1334, 1091, 1005, 697, 654  $\text{cm}^{-1}$ ; HRMS (ESI - TOF) Calcd. for  $\text{C}_{29}\text{H}_{28}\text{NO}_2\text{NaI}$   $[\text{M}+\text{Na}]^+$ : 604.0778, Found: 604.0796.

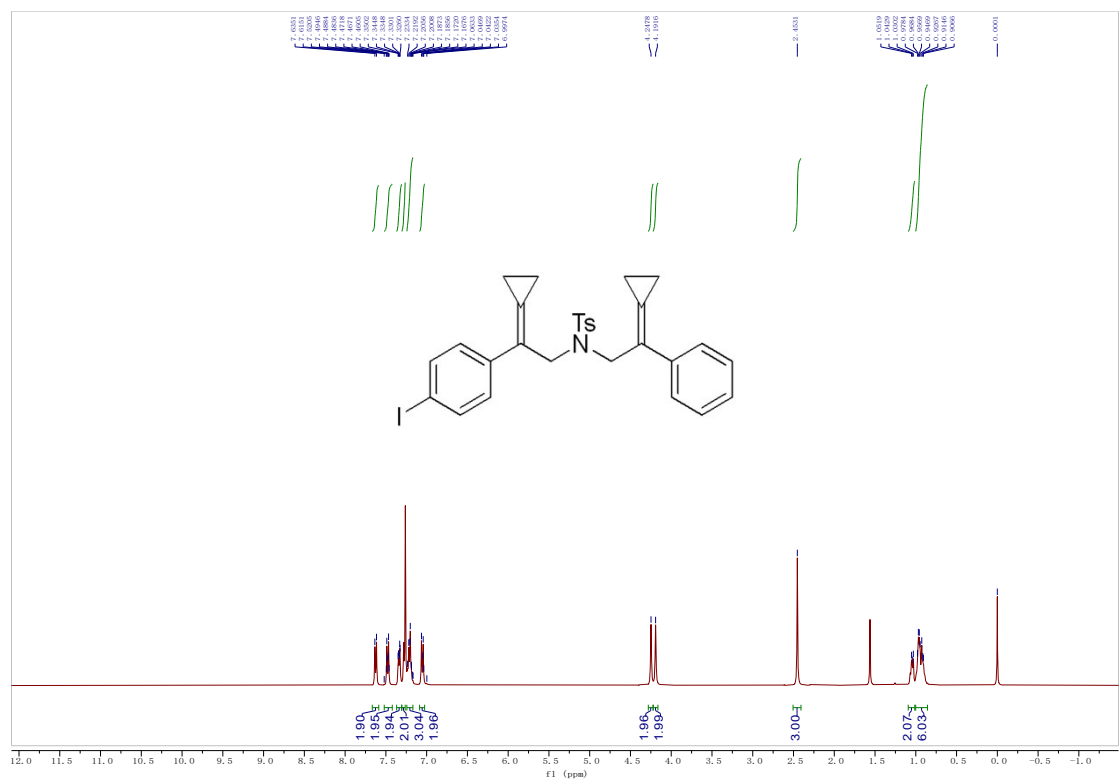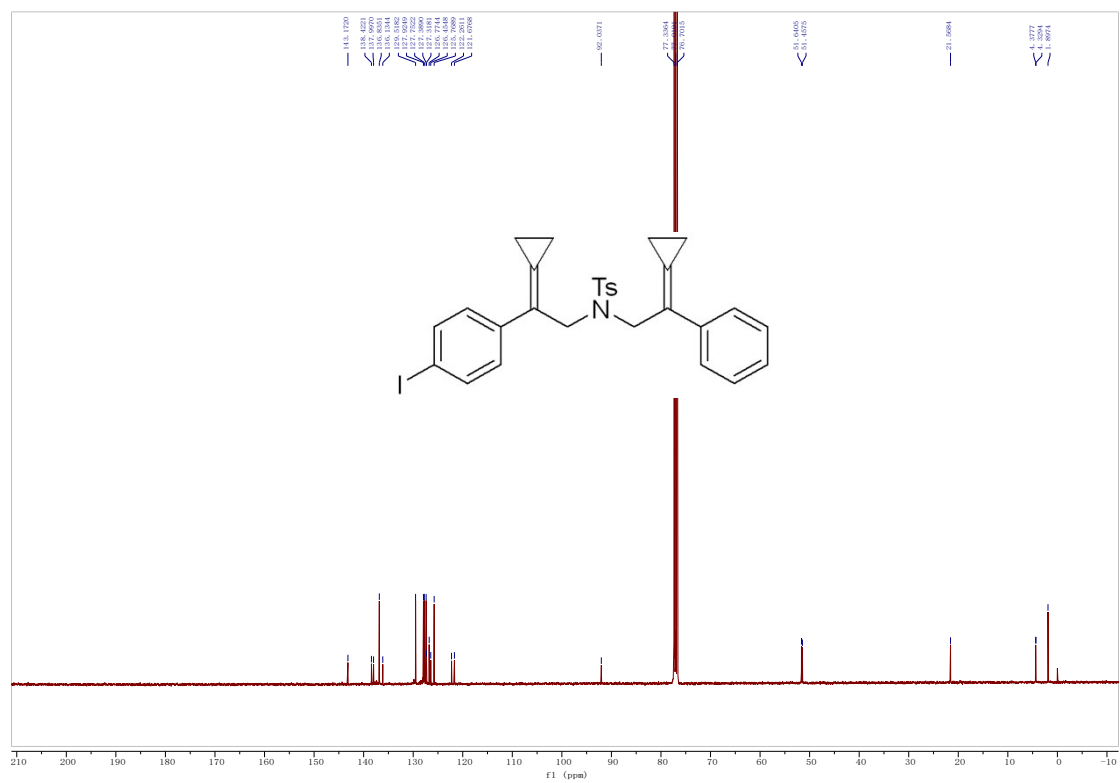

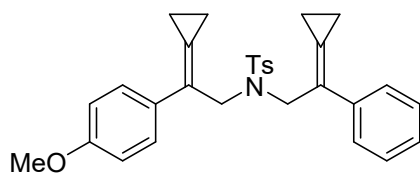

**Compound 1h:** Yield: 364 mg, 75%; A white solid; M.p.: 122 - 124 °C;  $^1\text{H}$  NMR (400 MHz,  $\text{CDCl}_3$ )  $\delta$  7.63 (d,  $J$  = 7.9 Hz, 2H), 7.37 – 7.29 (m, 4H), 7.28 – 7.23 (m, 2H), 7.23 – 7.14 (m, 3H), 6.74 (d,  $J$  = 8.3 Hz, 2H), 4.25 (s, 2H), 4.23 (s, 2H), 3.79 (s, 3H), 2.43 (s, 3H), 1.06 – 0.92 (m, 6H), 0.90 – 0.84 (m, 2H);  $^{13}\text{C}$  NMR (100 MHz,  $\text{CDCl}_3$ )  $\delta$  159.3, 143.9, 139.6, 137.3, 132.1, 130.4, 128.8, 128.3, 127.9, 127.5, 127.2, 126.7, 125.2, 123.1, 122.5, 114.1, 56.2, 52.8, 52.3, 22.4, 5.1, 5.0, 2.9, 2.6; IR (neat):  $\nu$  2918, 1605, 1512, 1339, 1248, 1162, 1032, 825, 751  $\text{cm}^{-1}$ ; HRMS (ESI - TOF) Calcd. for  $\text{C}_{30}\text{H}_{32}\text{NO}_3\text{S}$   $[\text{M}+\text{H}]^+$ : 486.2097, Found: 486.2099.

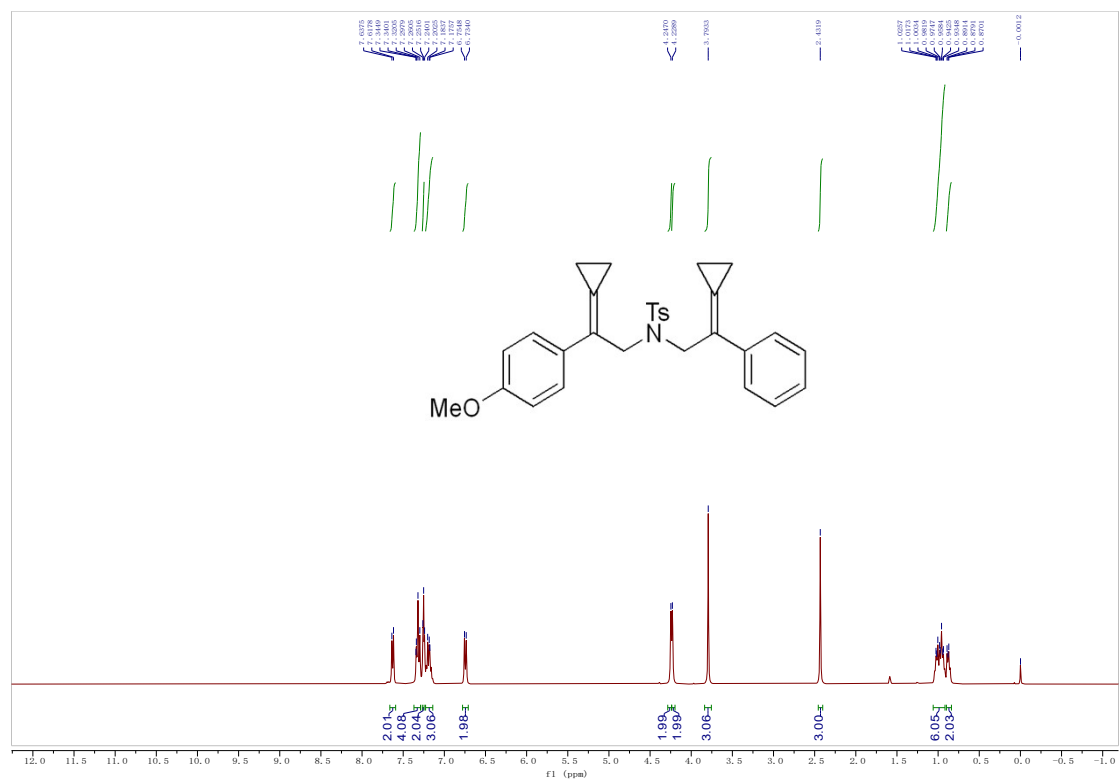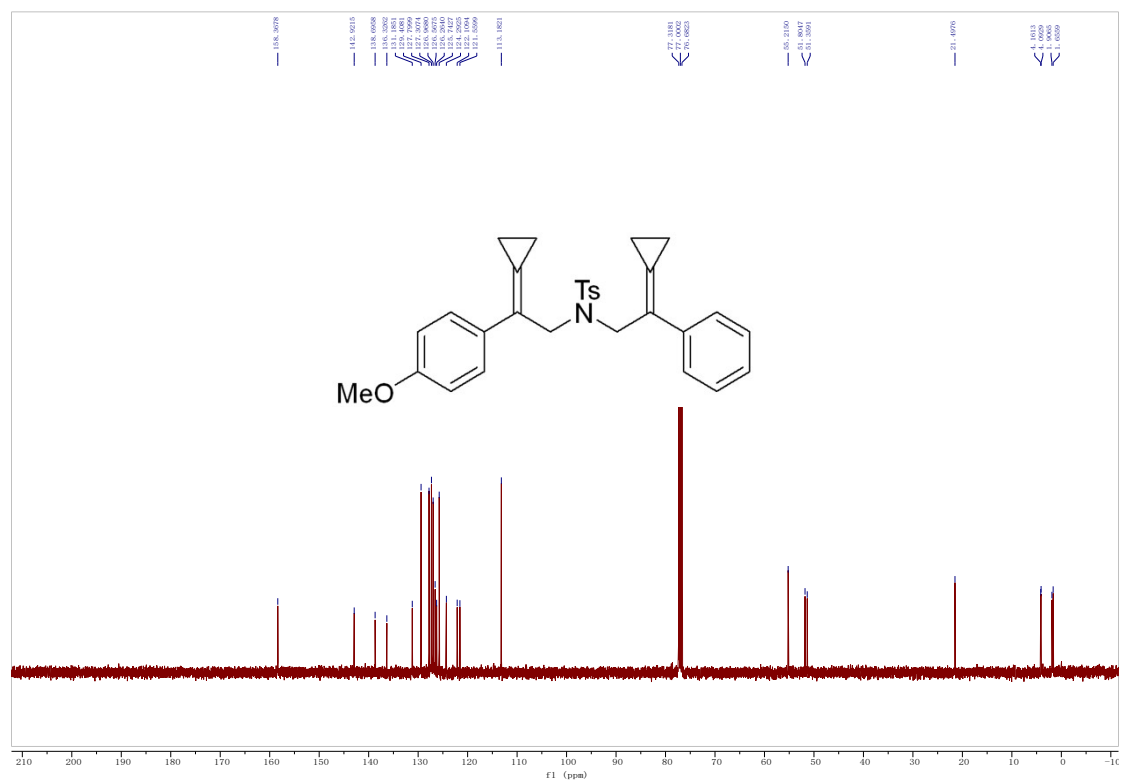

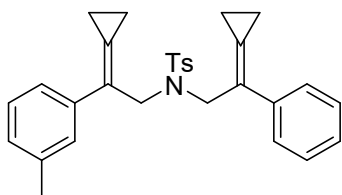

**Compound 1i:** Yield: 380 mg, 81%; A white solid; M.p.: 121 - 119 °C;  $^1\text{H}$  NMR (400 MHz,  $\text{CDCl}_3$ )  $\delta$  7.53 (d,  $J = 7.8$  Hz, 2H), 7.25 (d,  $J = 7.8$  Hz, 2H), 7.17 – 7.10 (m, 4H), 7.10 – 7.03 (m, 3H), 7.04 – 6.97 (m, 2H), 6.91 – 6.85 (m, 1H), 4.21 – 4.05 (m, 4H), 2.30 (s, 3H), 2.18 (s, 3H), 0.92 – 0.83 (m, 4H), 0.84 – 0.74 (m, 4H);  $^{13}\text{C}$  NMR (100 MHz,  $\text{CDCl}_3$ )  $\delta$  142.8, 138.6, 138.5, 137.1, 136.3, 129.3, 127.7, 127.3, 127.2, 126.5, 126.4, 126.3, 126.1, 125.6, 122.9, 122.0, 121.9, 51.4, 21.4, 4.02, 3.96, 1.8, 1.7; IR (neat):  $\nu$  2962, 1790, 1504, 1329, 1236, 1187, 1160, 1078, 772, 699 $\text{cm}^{-1}$ ; HRMS (ESI - TOF) Calcd. for  $\text{C}_{30}\text{H}_{31}\text{NO}_2\text{SNa}$   $[\text{M}+\text{Na}]^+$ : 492.1968, Found: 492.1963.

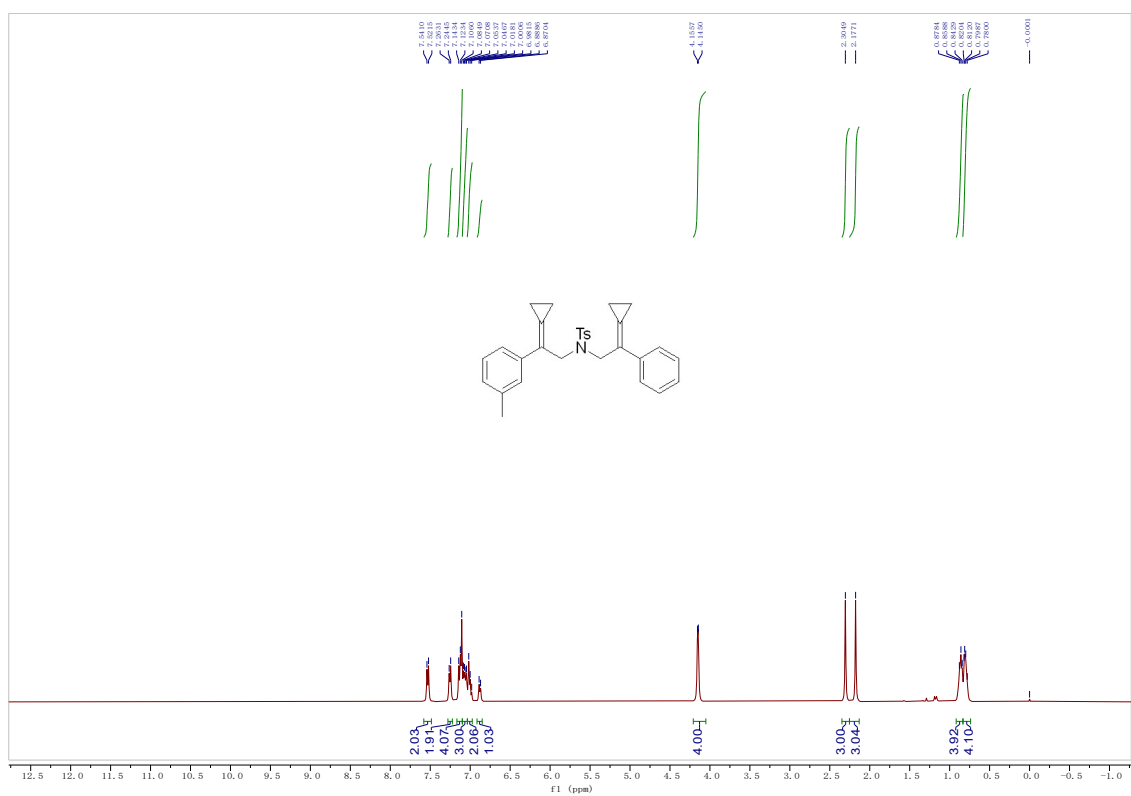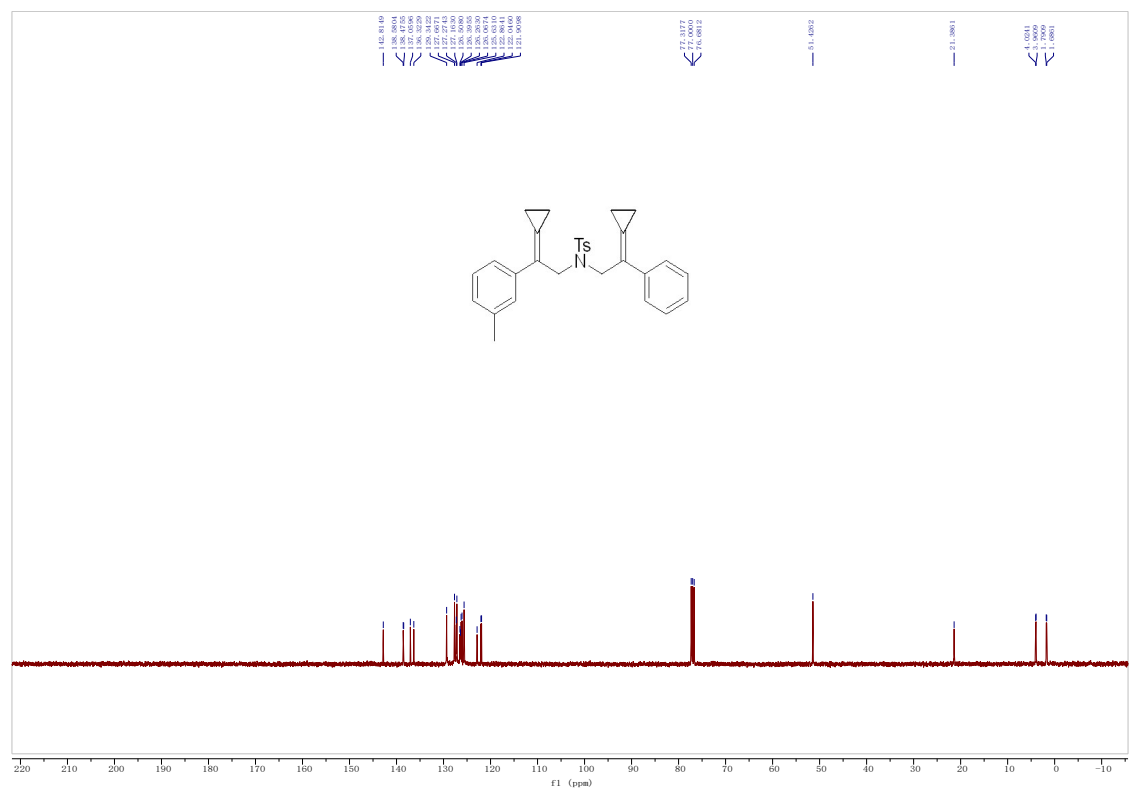

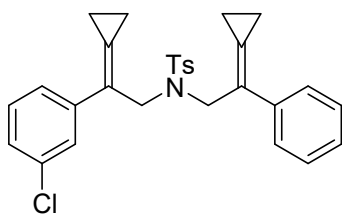

**Compound 1j:** Yield: 380 mg, 77%; A white solid; M.p.: 130 - 132 °C;  $^1\text{H}$  NMR (400 MHz,  $\text{CDCl}_3$ )  $\delta$  7.63 (d,  $J$  = 8.0 Hz, 2H), 7.42 – 7.33 (m, 2H), 7.31 – 7.15 (m, 7H), 7.15 – 7.05 (m, 2H), 4.25 (s, 2H), 4.18 (s, 2H), 2.44 (s, 3H), 1.09 – 0.99 (m, 2H), 0.98 – 0.76 (m, 6H);  $^{13}\text{C}$  NMR (100 MHz,  $\text{CDCl}_3$ )  $\delta$  143.4, 140.6, 138.4, 136.1, 133.8, 129.7, 129.2, 128.3, 128.1, 127.5, 126.9, 126.8, 126.7, 125.9, 125.8, 124.0, 122.1, 121.3, 77.5, 77.2, 76.9, 51.9, 51.6, 21.7, 4.5, 4.3, 2.1, 1.9; IR (neat):  $\nu$  2972, 1713, 1594, 1564, 1447, 1338, 1161, 1092, 905, 710, 692  $\text{cm}^{-1}$ ; HRMS (ESI - TOF) Calcd. for  $\text{C}_{29}\text{H}_{28}\text{NO}_2\text{NaSCl}$   $[\text{M}+\text{Na}]^+$ : 512.1422, Found: 512.1422.



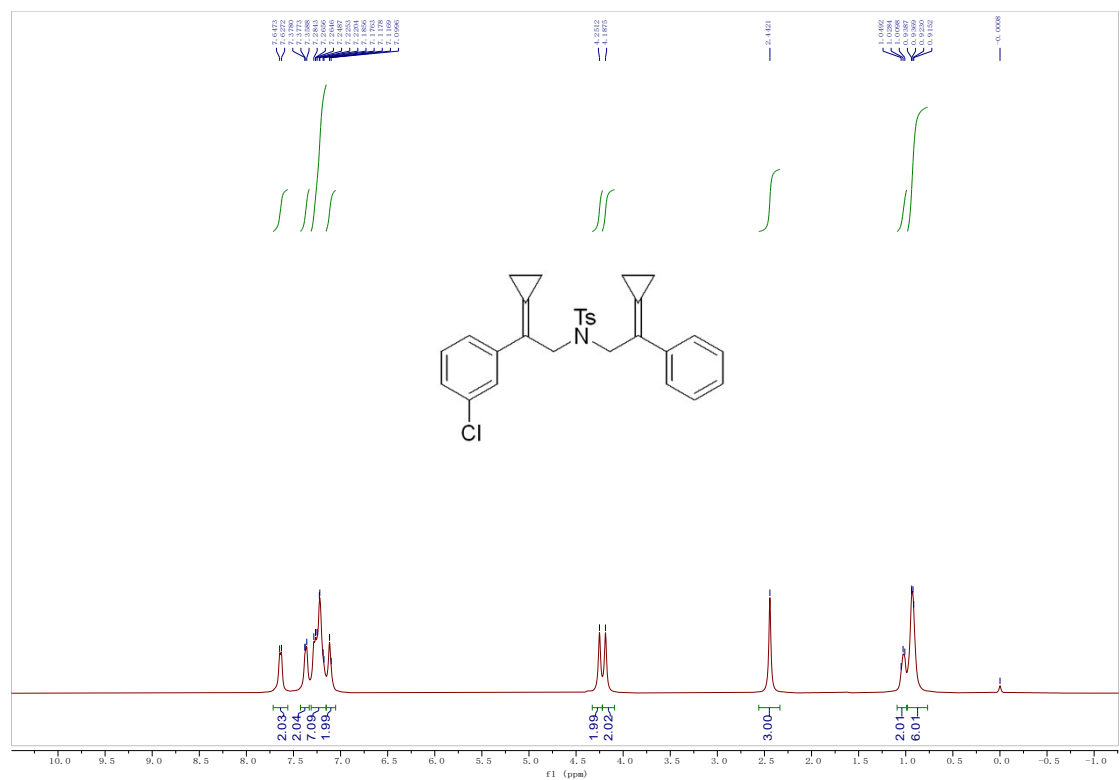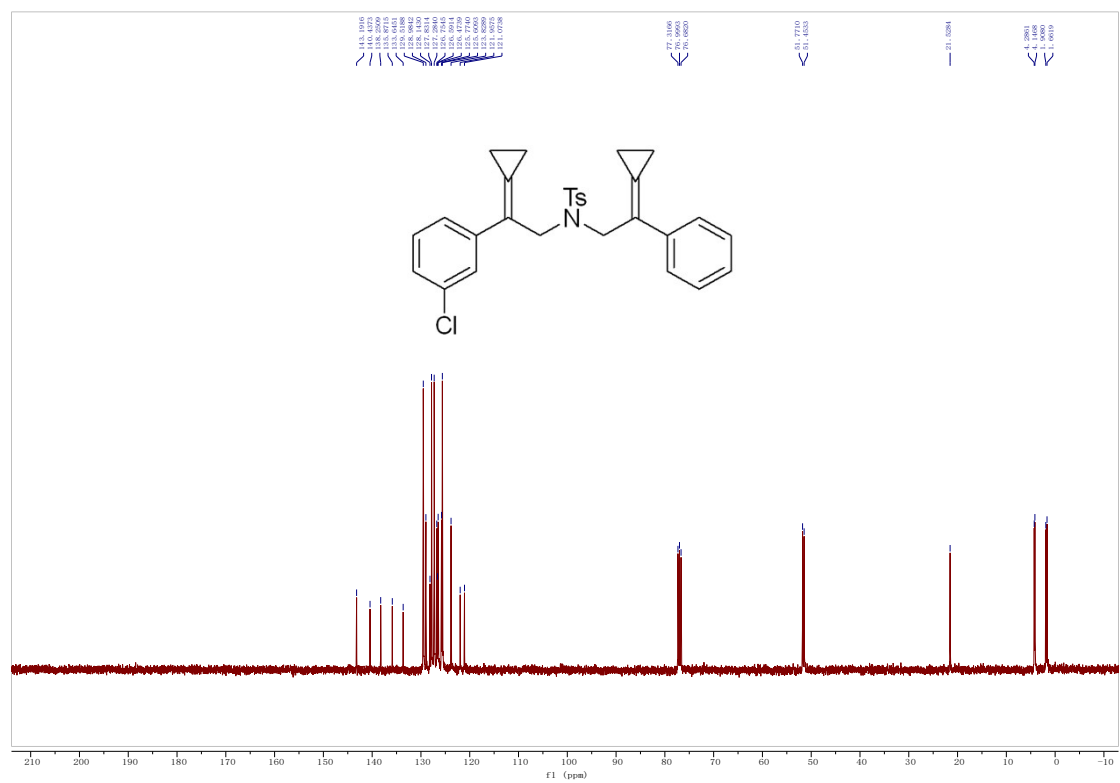

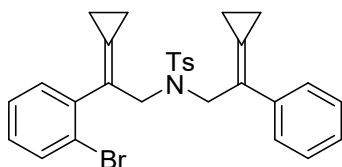

**Compound 1k:** Yield: 472 mg, 85%; A white solid; M.p.: 140 - 142 °C;  $^1\text{H}$  NMR (400 MHz,  $\text{CDCl}_3$ )  $\delta$  7.62 (d,  $J = 7.8$  Hz, 2H), 7.52 (d,  $J = 7.5$  Hz, 2H), 7.37 (d,  $J = 7.9$  Hz, 1H), 7.27 – 7.23 (m, 3H), 7.23 – 7.18 (m, 2H), 7.08 – 7.00 (m, 1H), 7.00 – 6.93 (m, 1H), 6.83 (d,  $J = 7.4$  Hz, 1H), 4.35 (s, 2H), 4.19 (s, 2H), 2.43 (s, 3H), 1.37 – 1.26 (m, 2H), 1.17 – 1.10 (m, 2H), 1.10 – 1.02 (m, 2H), 0.93 – 0.83 (m, 2H);  $^{13}\text{C}$  NMR (100 MHz,  $\text{CDCl}_3$ )  $\delta$  142.8, 140.9, 137.9, 136.6, 132.2, 131.2, 129.4, 128.3, 128.0, 127.5, 127.3, 126.8, 126.8, 126.2, 126.1, 125.1, 122.6, 122.2, 52.0, 51.4, 21.4, 4.9, 3.5, 2.5, 1.6; IR (neat):  $\nu$  2959, 1756, 1457, 1356, 1099, 1052, 899, 710, 688  $\text{cm}^{-1}$ ; HRMS (ESI - TOF) Calcd. for  $\text{C}_{29}\text{H}_{28}\text{NO}_2\text{NaSBr}$   $[\text{M}+\text{Na}]^+$ : 556.0916, Found: 556.0915.

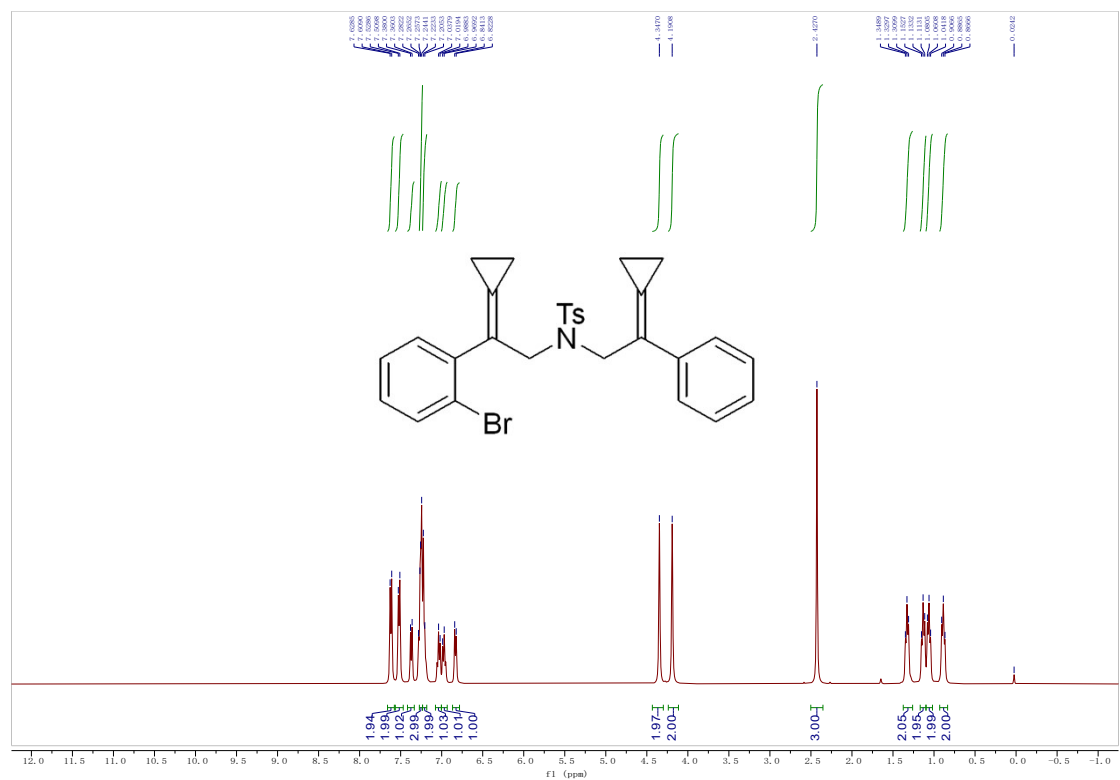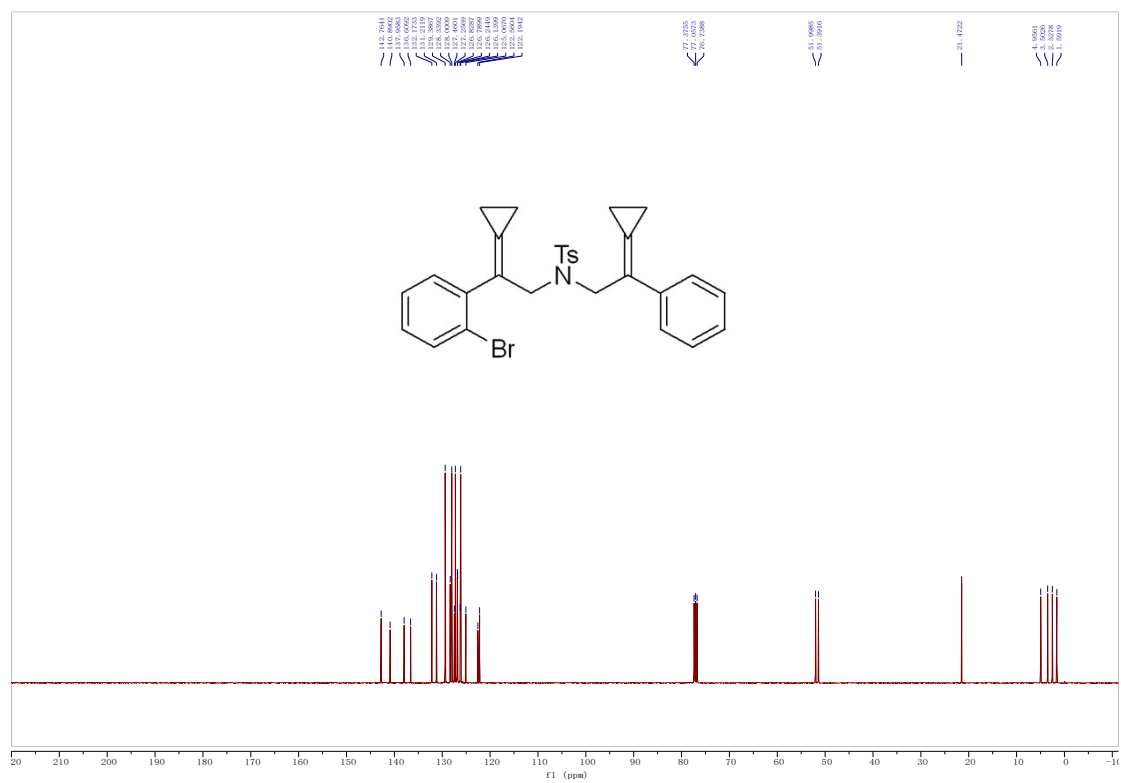

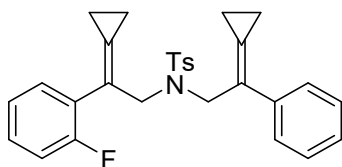

**Compound 1l:** Yield: 401 mg, 81%; A white solid; M.p.: 162 - 164 °C;  $^1\text{H}$  NMR (400 MHz,  $\text{CDCl}_3$ )  $\delta$  7.6 (d,  $J = 8.3$  Hz, 2H), 7.5 (d,  $J = 7.5$  Hz, 2H), 7.3–7.2 (m, 5H), 7.2 – 7.1 (m, 1H), 7.1 – 6.9 (m, 2H), 6.9 – 6.8 (m, 1H), 4.3 (s, 2H), 4.2 (s, 2H), 2.4 (s, 3H), 1.2 – 1.1 (m, 2H), 1.1 – 1.0 (m, 2H), 1.0 – 0.8 (m, 4H);  $^{13}\text{C}$  NMR (100 MHz,  $\text{CDCl}_3$ )  $\delta$  161.0, 158.6 (d,  $J = 245.1$  Hz), 142.8, 138.1, 136.7, 130.12, 130.08 (d,  $J = 4.6$  Hz), 129.4, 128.88, 128.86 (d,  $J = 1.3$  Hz), 128.3, 128.2 (d,  $J = 8.2$  Hz), 127.9, 127.7, 127.5, 127.2, 126.8, 126.3, 126.0, 123.6, 123.5 (d,  $J = 3.4$  Hz), 122.2, 119.89, 119.88 (d,  $J = 2.2$  Hz), 115.5, 115.2 (d,  $J = 22.4$  Hz), 52.1, 51.62, 51.57, 21.5, 4.7, 3.7, 2.8, 1.5;  $^{19}\text{F}$  NMR (376 MHz,  $\text{CDCl}_3$ )  $\delta$  -114.1; IR (neat):  $\nu$  2979, 1780, 1598, 1489, 1448, 1339, 1092, 815, 756, 669  $\text{cm}^{-1}$ ; HRMS (ESI - TOF) Calcd. for  $\text{C}_{29}\text{H}_{28}\text{NO}_2\text{NaSF}$   $[\text{M}+\text{Na}]^+$  496.1717, Found: 496.1709.

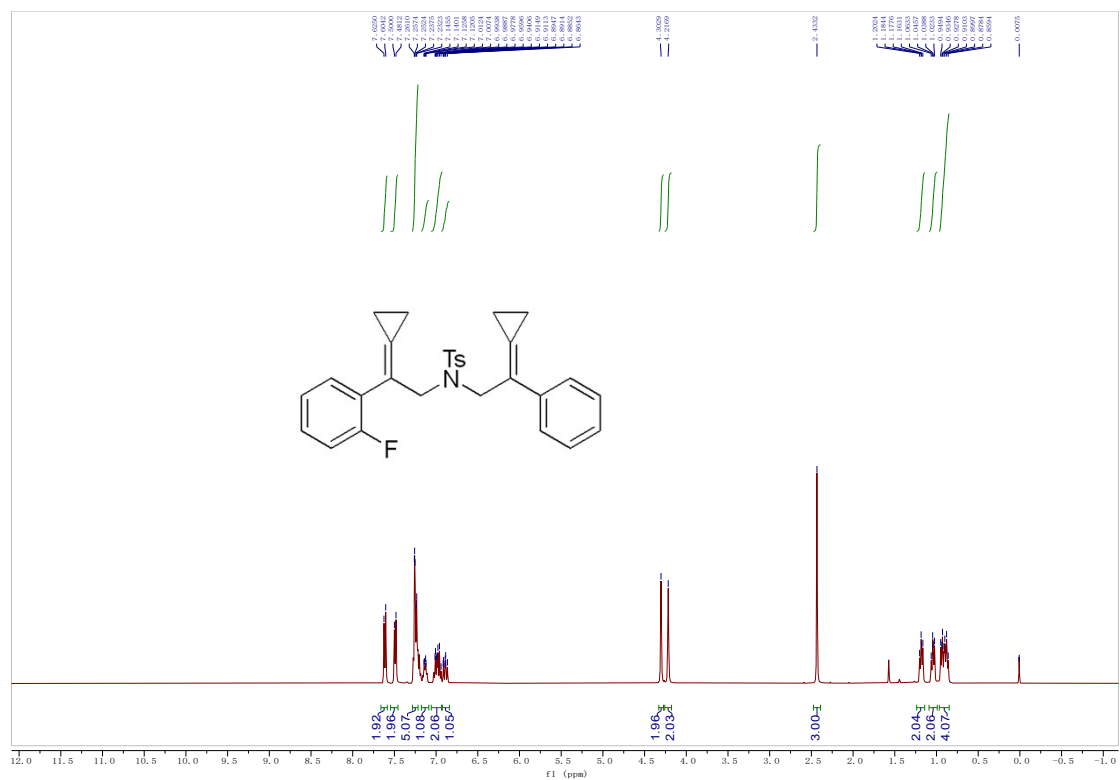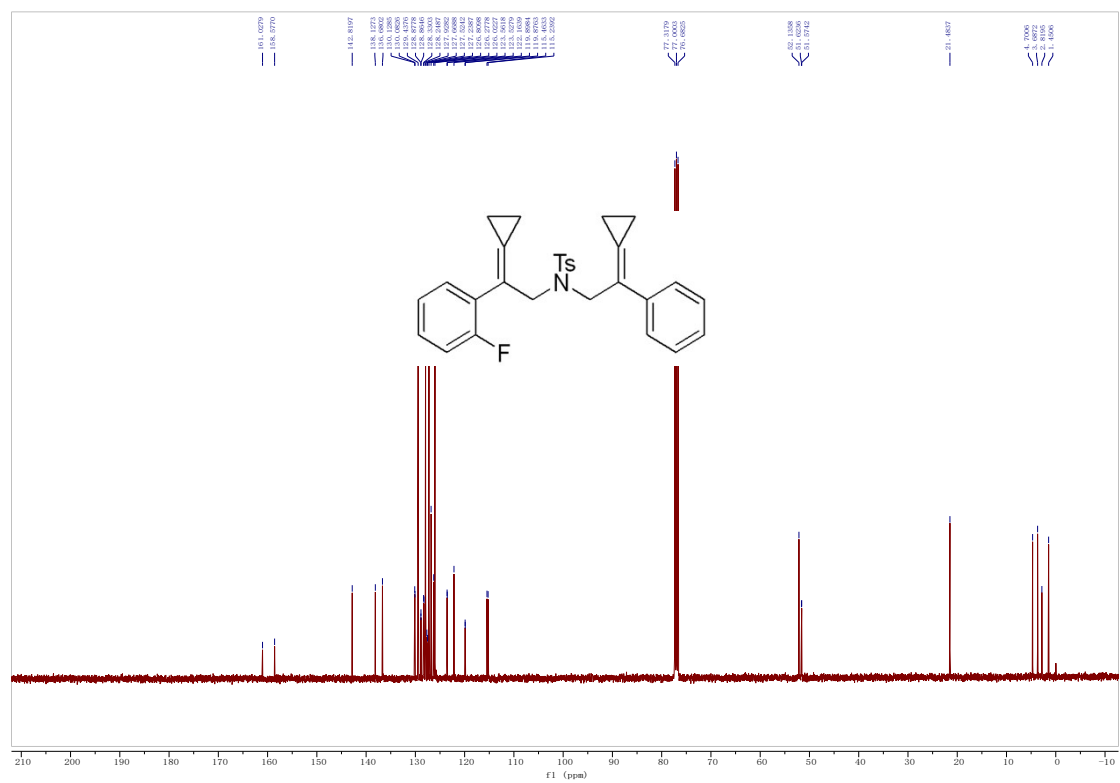

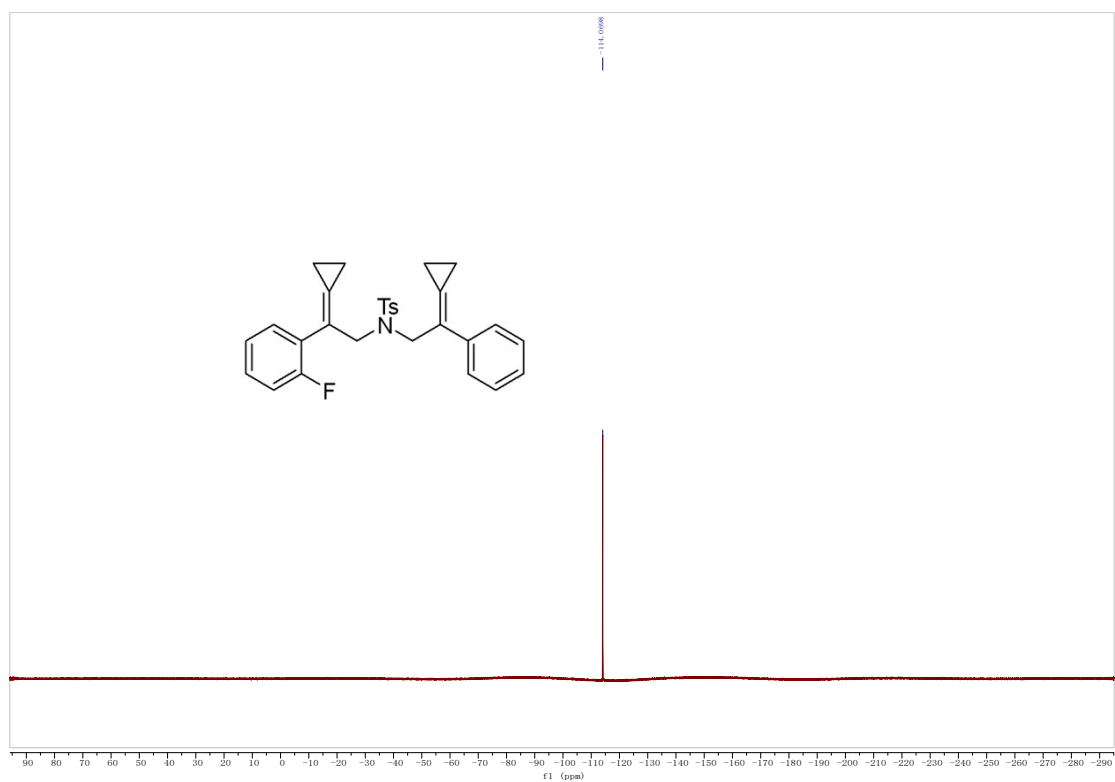

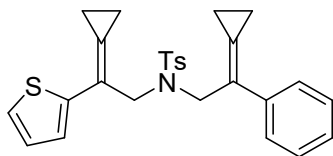

**Compound 1m:** Yield: 343 mg, 71%; A white solid; M.p.: 155 - 157 °C;  $^1\text{H}$  NMR (400 MHz,  $\text{CDCl}_3$ )  $\delta$  7.68 (d,  $J = 7.9$  Hz, 2H), 7.39 – 7.34 (m, 2H), 7.31 – 7.27 (m, 2H), 7.24 – 7.15 (m, 3H), 7.13 – 7.09 (m, 1H), 6.99 – 6.93 (m, 1H), 6.92 – 6.87 (m, 1H), 4.31 (s, 2H), 4.19 (s, 2H), 2.45 (s, 3H), 1.07 – 1.00 (m, 2H), 1.00 – 0.96 (m, 2H), 0.96 – 0.90 (m, 4H).  $^{13}\text{C}$  NMR (100 MHz,  $\text{CDCl}_3$ )  $\delta$  144.3, 143.2, 138.7, 136.4, 129.7, 128.0, 127.4, 126.9, 126.9, 126.8, 126.0, 125.4, 124.1, 122.4, 122.3, 118.3, 51.9, 51.3, 21.7, 4.7, 4.4, 3.8, 2.1; IR (neat):  $\nu$  2973, 1594, 1353, 1333, 1163, 1090, 817, 743, 709, 697  $\text{cm}^{-1}$ ; HRMS (ESI - TOF) Calcd. for  $\text{C}_{27}\text{H}_{27}\text{NO}_2\text{NaS}_2$   $[\text{M}+\text{Na}]^+$ : 484.1375, Found: 484.1384.

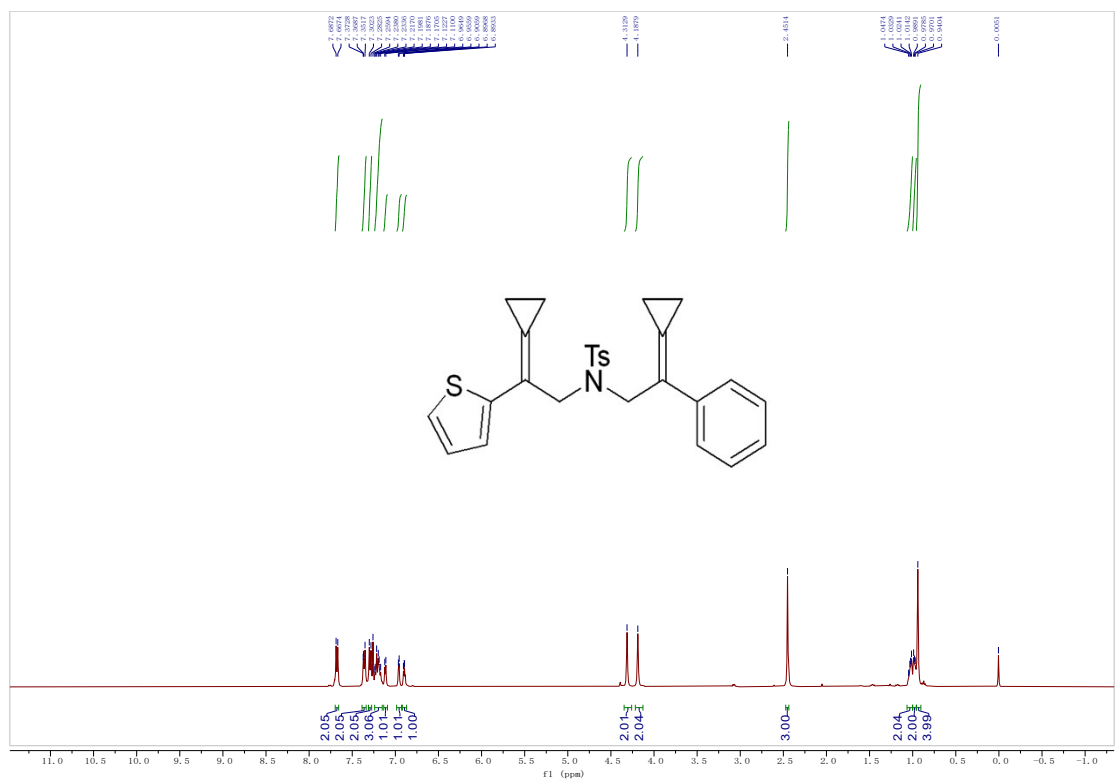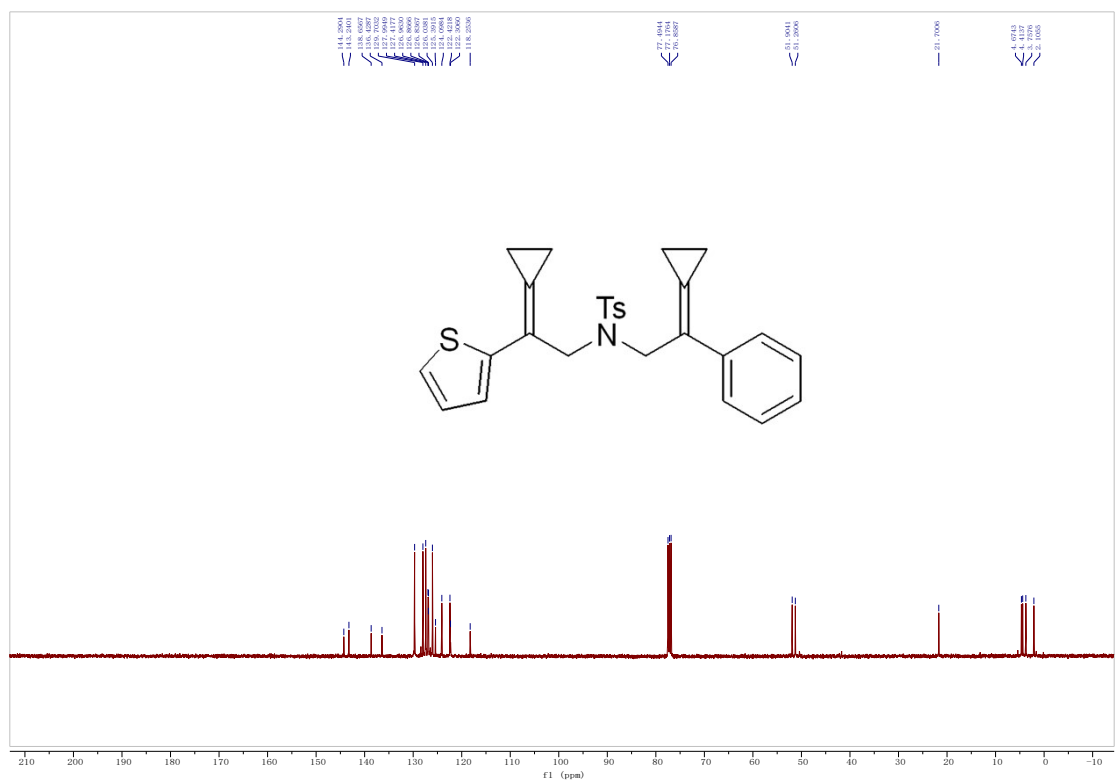



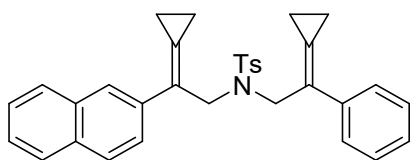

**Compound 1n:** Yield: 375 mg, 71%; A white solid; M.p.: 112 - 114 °C;  $^1\text{H}$  NMR (400 MHz,  $\text{CDCl}_3$ )  $\delta$  7.62 (d,  $J$  = 7.8 Hz, 2H), 7.52 (d,  $J$  = 7.5 Hz, 2H), 7.37 (d,  $J$  = 7.9 Hz, 1H), 7.27 – 7.23 (m, 3H), 7.23 – 7.18 (m, 2H), 7.08 – 7.00 (m, 1H), 7.00 – 6.93 (m, 1H), 6.83 (d,  $J$  = 7.4 Hz, 1H), 4.35 (s, 2H), 4.19 (s, 2H), 2.43 (s, 3H), 1.37 – 1.26 (m, 2H), 1.17 – 1.10 (m, 2H), 1.10 – 1.02 (m, 2H), 0.93 – 0.83 (m, 2H);  $^{13}\text{C}$  NMR (100 MHz,  $\text{CDCl}_3$ )  $\delta$  143.0, 138.6, 136.5, 136.1, 133.1, 132.3, 129.5, 128.3, 128.1, 127.8, 127.4, 127.3, 127.2, 126.7, 126.5, 125.9, 125.8, 125.6, 124.5, 124.2, 122.2, 122.1, 77.3, 77.0, 76.7, 51.6, 51.5, 21.5, 4.4, 4.1, 2.0, 1.9; IR (neat):  $\nu$  2972, 1775, 1711, 1597, 1447, 1160, 1091, 1018, 747, 654  $\text{cm}^{-1}$ ; HRMS (ESI - TOF) Calcd. for  $\text{C}_{33}\text{H}_{31}\text{NO}_2\text{NaS}$   $[\text{M}+\text{Na}]^+$ : 528.1968, Found: 528.1976.

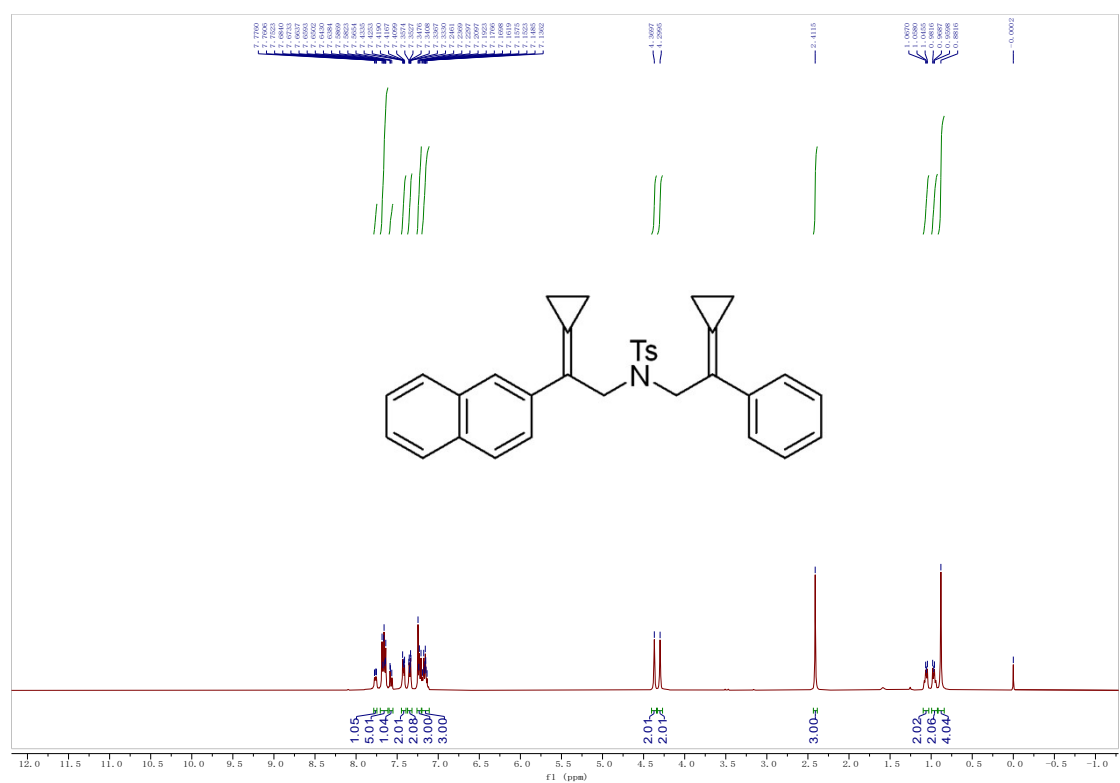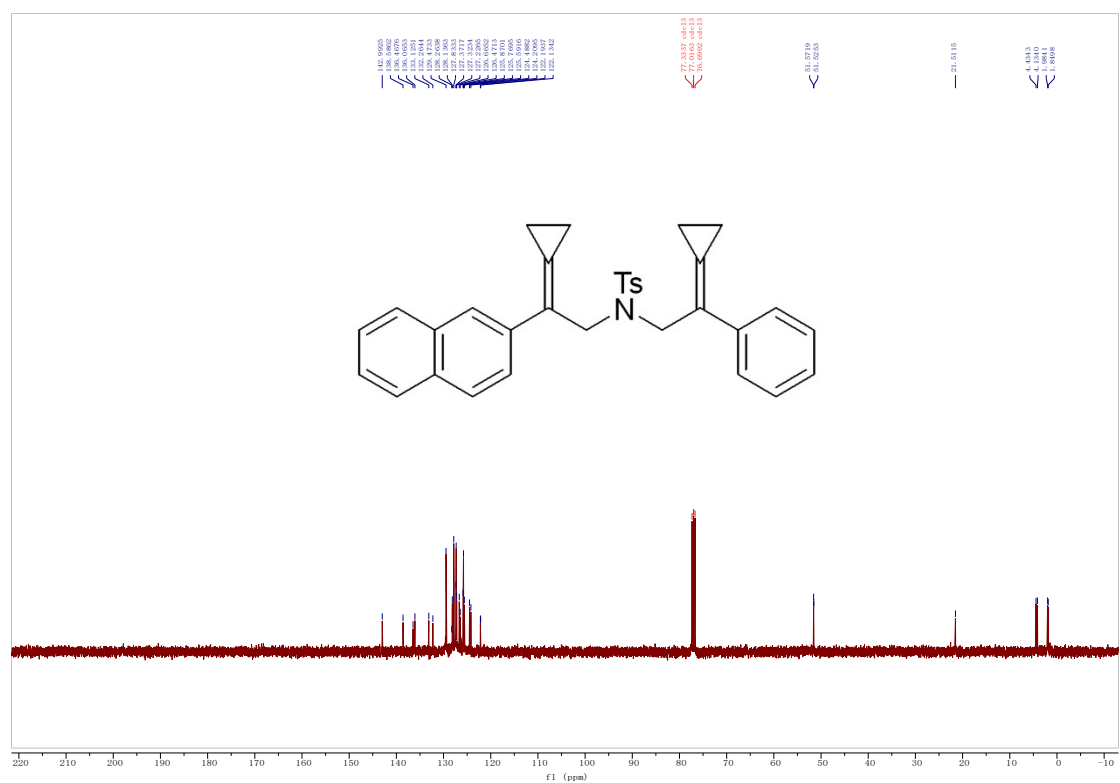

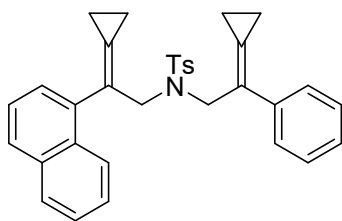

**Compound 1o:** Yield: 438 mg, 83%; A white solid; M.p.: 109 - 111 °C;  $^1\text{H}$  NMR (400 MHz,  $\text{CDCl}_3$ )  $\delta$  7.79 (d,  $J = 8.1$  Hz, 1H), 7.68 – 7.59 (m, 2H), 7.51 (d,  $J = 7.9$  Hz, 2H), 7.45 – 7.38 (m, 3H), 7.36 (d,  $J = 7.7$  Hz, 1H), 7.25 – 7.18 (m, 4H), 7.12 (d,  $J = 7.9$  Hz, 2H), 6.97 (d,  $J = 7.0$  Hz, 1H), 4.36 (s, 2H), 4.27 (s, 2H), 2.38 (s, 3H), 1.28 – 1.19 (m, 2H), 1.19 – 1.10 (m, 2H), 0.94 – 0.85 (m, 2H), 0.84 – 0.68 (m, 2H);  $^{13}\text{C}$  NMR (100 MHz,  $\text{CDCl}_3$ )  $\delta$  142.6, 138.2, 138.2, 137.1, 133.7, 131.4, 129.3, 128.3, 128.1, 127.2, 127.03, 126.95, 126.87, 126.23, 126.15, 125.8, 125.6, 125.5, 125.4, 125.1, 123.5, 122.4, 52.6, 51.6, 21.5, 4.5, 3.9, 2.6, 1.6; IR (neat):  $\nu$  3053, 1711, 1597, 1496, 1337, 1157, 1091, 740, 709, 694  $\text{cm}^{-1}$ ; HRMS (ESI - TOF) Calcd. for  $\text{C}_{33}\text{H}_{31}\text{NO}_2\text{NaS}$   $[\text{M}+\text{Na}]^+$ : 528.1968, Found: 528.1963.

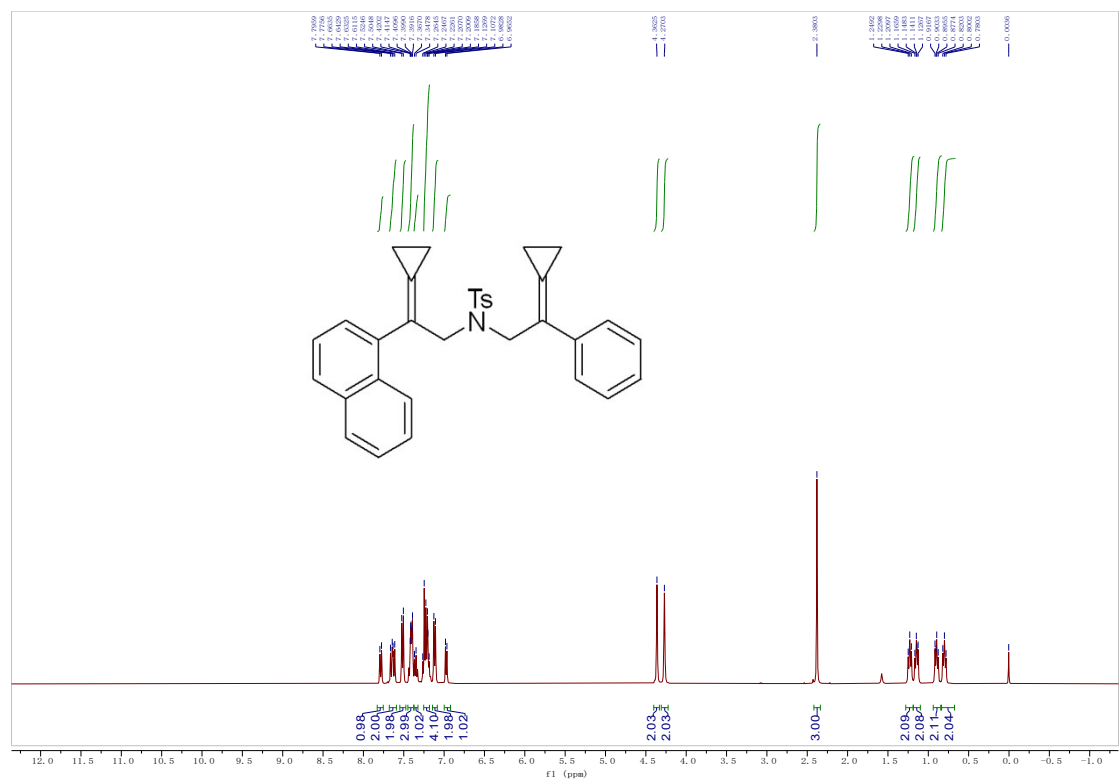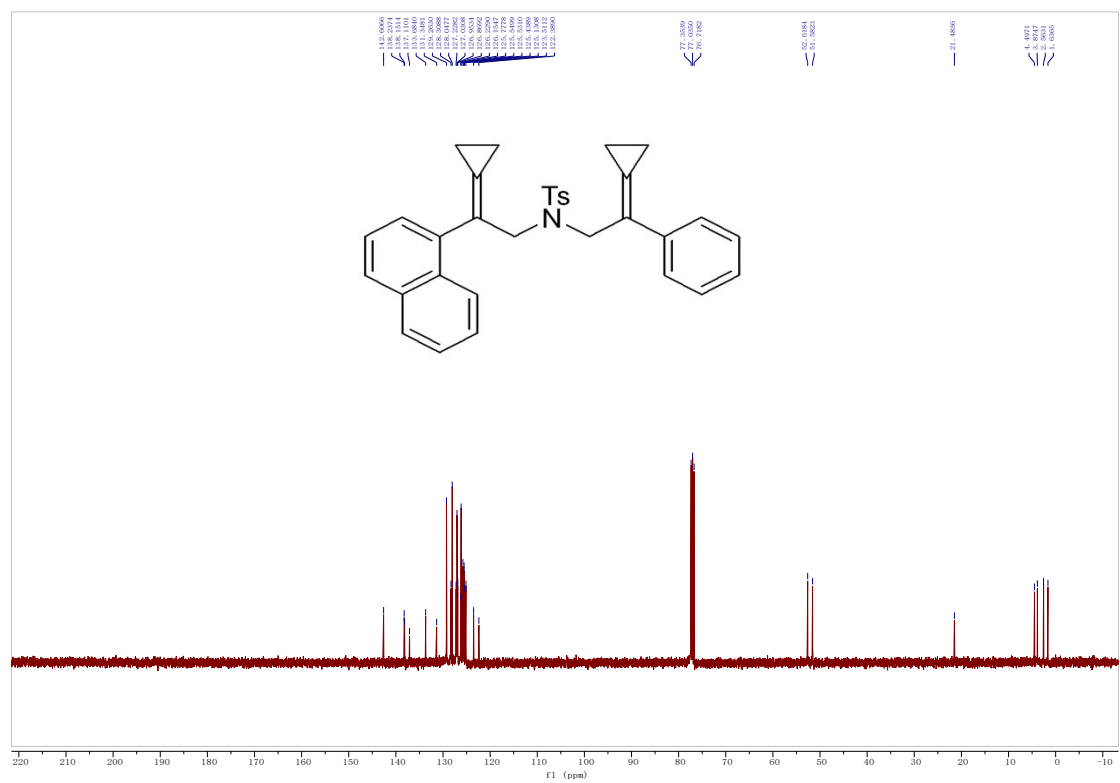

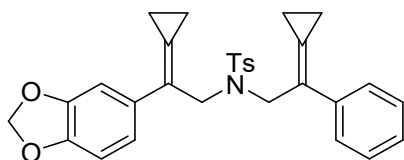

**Compound 1p:** Yield: 407 mg, 78%; A white solid; M.p.: 166 - 168 °C;  $^1\text{H}$  NMR (400 MHz,  $\text{CDCl}_3$ )  $\delta$  7.62 (d,  $J = 8.2$  Hz, 2H), 7.41 – 7.34 (m, 2H), 7.29 – 7.23 (m, 3H), 7.22 – 7.15 (m, 2H), 6.88 – 6.83 (m, 1H), 6.83 – 6.77 (m, 1H), 6.62 (d,  $J = 8.1$  Hz, 1H), 5.92 (s, 2H), 4.27 (s, 2H), 4.19 (s, 2H), 2.44 (s, 3H), 1.13 – 1.05 (m, 2H), 1.04 – 0.93 (m, 4H), 0.92 – 0.85 (m, 2H);  $^{13}\text{C}$  NMR (100 MHz,  $\text{CDCl}_3$ )  $\delta$  147.3, 146.3, 143.0, 138.6, 136.4, 133.0, 129.4, 127.9, 127.4, 126.7, 126.2, 125.9, 125.0, 122.3, 121.9, 119.4, 107.6, 106.6, 100.8, 51.9, 51.5, 21.5, 4.3, 1.9; IR (neat):  $\nu$  2968, 1712, 1489, 1440, 1338, 1222, 1161, 1091, 935, 954, 694  $\text{cm}^{-1}$ ; HRMS (ESI - TOF) Calcd. for  $\text{C}_{30}\text{H}_{29}\text{NO}_4\text{NaS}$   $[\text{M}+\text{Na}]^+$ : 522.1709, Found: 522.1707.

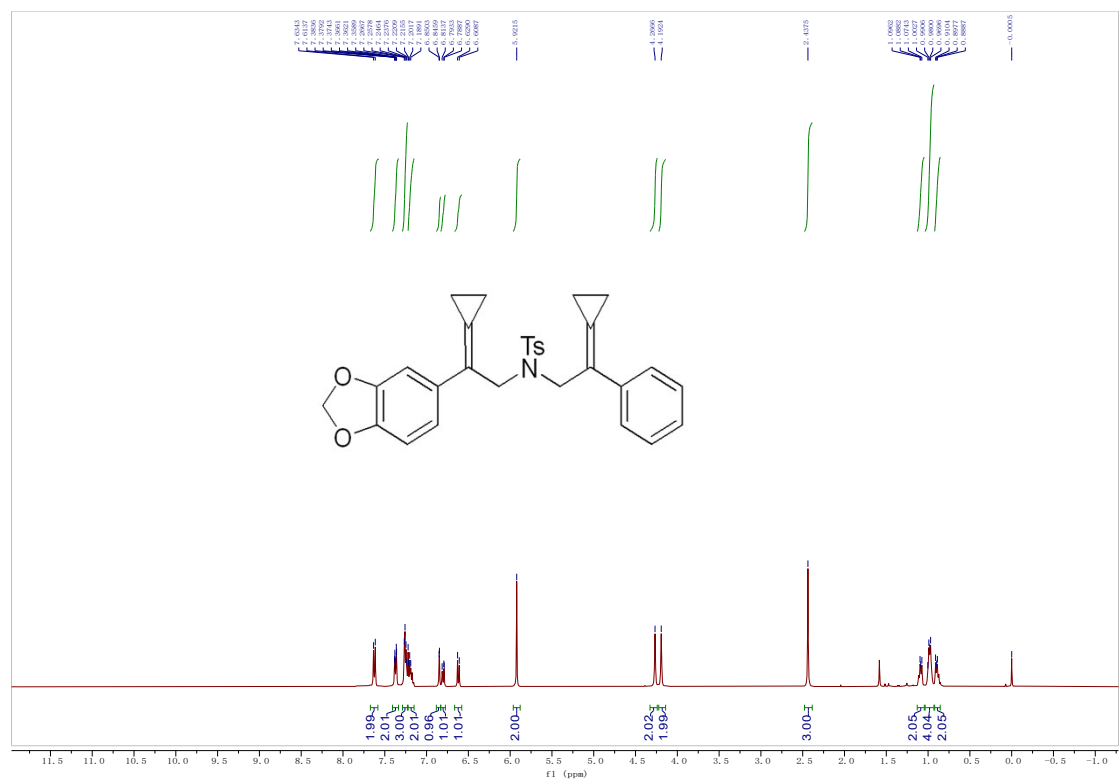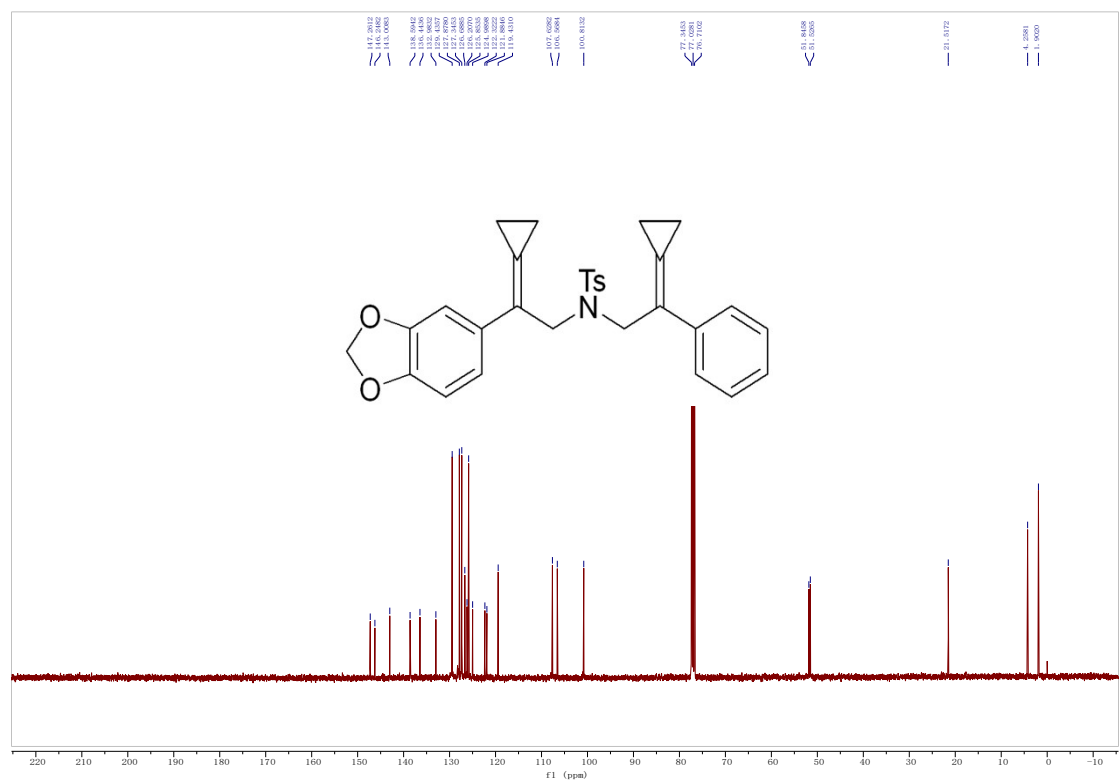

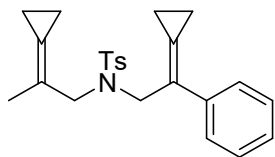

**Compound 1q:** Yield: 366 mg, 88%; A white solid; M.p.: 152 - 154 °C;  $^1\text{H}$  NMR (400 MHz,  $\text{CDCl}_3$ )  $\delta$  7.65 (d,  $J = 8.0$  Hz, 2H), 7.52 – 7.44 (m, 2H), 7.31 – 7.24 (m, 4H), 7.22 (d,  $J = 7.2$  Hz, 1H), 4.36 (s, 2H), 3.76 (s, 2H), 2.44 (s, 3H), 1.45 (t,  $J = 1.8$  Hz, 3H), 1.36–1.29 (m, 2H), 1.15 – 1.07 (m, 2H), 0.87 – 0.76 (m, 4H);  $^{13}\text{C}$  NMR (100 MHz,  $\text{CDCl}_3$ )  $\delta$  142.9, 138.1, 136.9, 129.4, 128.0, 127.3, 126.9, 126.3, 125.8, 123.1, 120.6, 119.8, 53.1, 51.7, 21.5, 18.3, 4.8, 2.7, 1.7, 1.6; IR (neat):  $\nu$  2975, 1597, 1448, 1162, 1091, 757, 666, 657  $\text{cm}^{-1}$ ; HRMS (ESI - TOF) Calcd. for  $\text{C}_{24}\text{H}_{27}\text{NO}_2\text{SNa}$   $[\text{M}+\text{Na}]^+$ : 416.1655, Found: 416.1660.

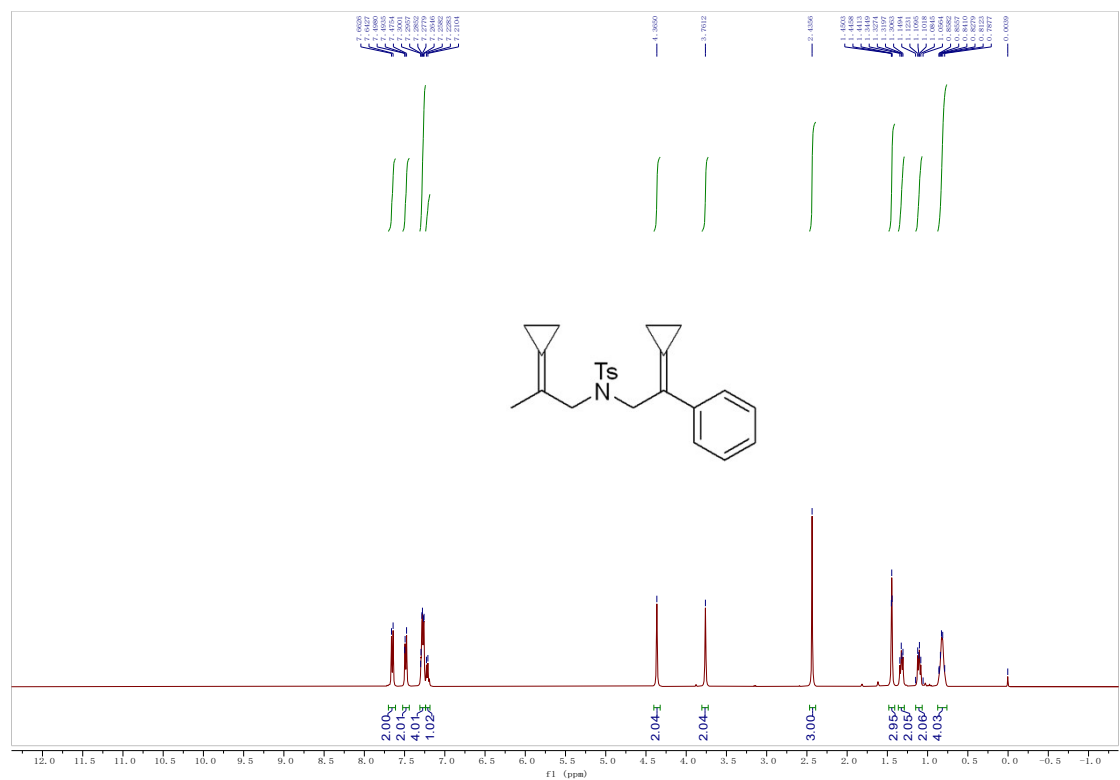



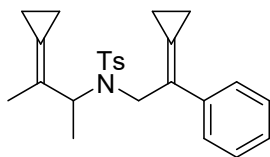

**Compound 1r:** Yield: 378mg, 88%; A white solid; M.p.: 146 - 148 °C;  $^1\text{H}$  NMR (400 MHz,  $\text{CDCl}_3$ )  $\delta$  7.66 (d,  $J = 8.3$  Hz, 2H), 7.46 – 7.39 (m, 2H), 7.31 – 7.26 (m, 4H), 7.22 – 7.17 (m, 1H), 4.76 – 4.69 (m, 1H), 4.52 – 4.44 (m, 1H), 4.13 (d,  $J = 14.4$  Hz, 1H), 2.43 (s, 3H), 1.34 – 1.30 (m, 1H), 1.30 – 1.27 (m, 3H), 1.26 – 1.15 (m, 3H), 1.12 (d,  $J = 7.0$  Hz, 3H), 1.06 – 1.00 (m, 1H), 0.79 – 0.65 (m, 3H);  $^{13}\text{C}$  NMR (100 MHz,  $\text{CDCl}_3$ )  $\delta$  142.9, 138.2, 137.8, 129.5, 127.8, 127.2, 126.7, 126.5, 124.9, 124.3, 123.9, 119.5, 57.3, 47.4, 21.5, 19.8, 15.3, 5.3, 4.7, 1.9, -0.2; IR (neat):  $\nu$  2970, 2365, 2326, 1336, 1153, 1091, 821, 650  $\text{cm}^{-1}$ ; HRMS (ESI - TOF) Calcd. for  $\text{C}_{25}\text{H}_{29}\text{NO}_2\text{SNa}$   $[\text{M}+\text{Na}]^+$ : 430.1811, Found: 430.1813.

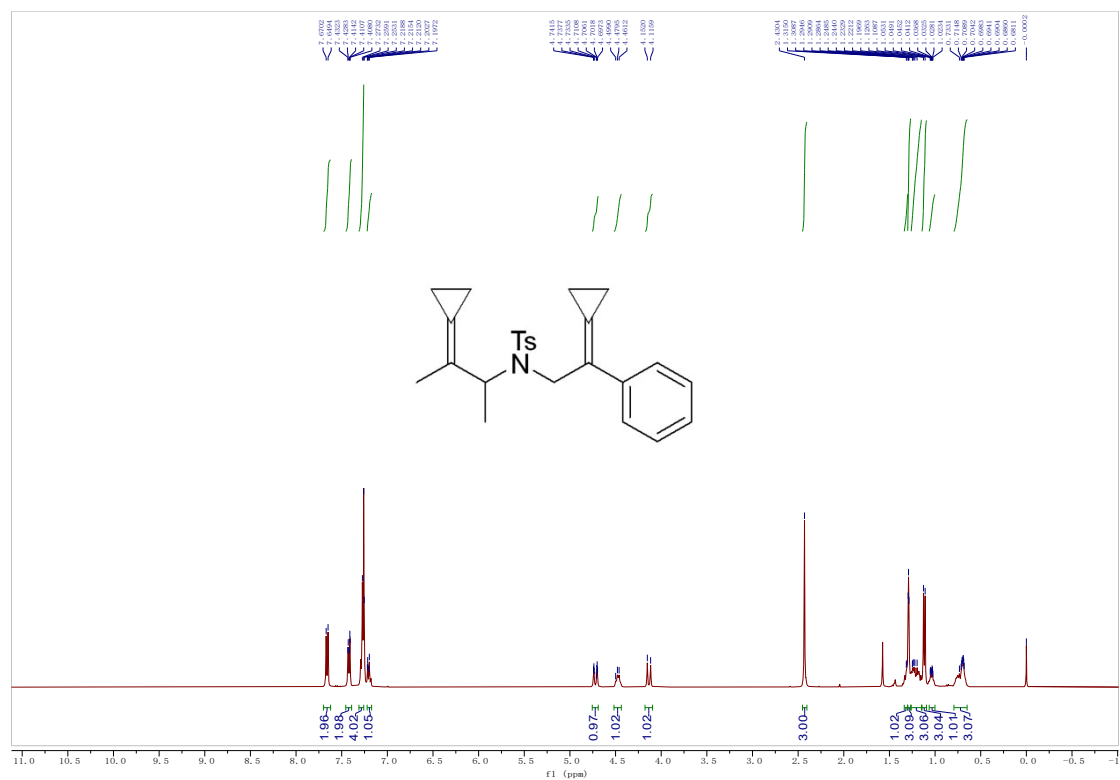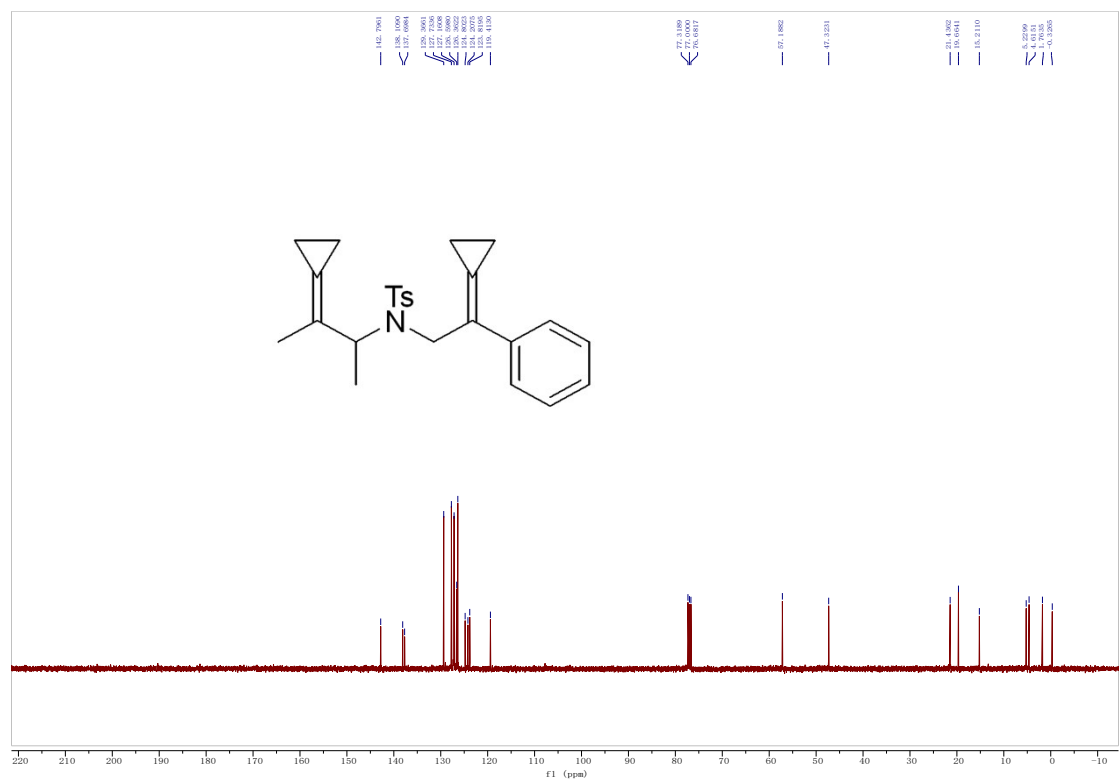

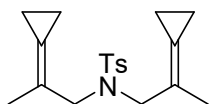

**Compound 1s:** Yield: 255mg, 72%; A white solid; M.p.: 98 - 100 °C;  $^1\text{H}$  NMR (400 MHz,  $\text{CDCl}_3$ )  $\delta$  7.67 (d,  $J = 7.4$  Hz, 2H), 7.27 (d,  $J = 7.4$  Hz, 2H), 3.85 (s, 4H), 2.41 (s, 3H), 1.69 (s, 6H), 0.99 – 0.92 (m, 4H), 0.92 – 0.85 (m, 4H);  $^{13}\text{C}$  NMR (100 MHz,  $\text{CDCl}_3$ )  $\delta$  142.7, 137.6, 129.3, 127.1, 120.5, 120.0, 52.9, 21.4, 18.4, 2.6, 1.8; IR (neat):  $\nu$  1326, 1204, 1038, 821, 786, 670  $\text{cm}^{-1}$ ; HRMS (ESI - TOF) Calcd. for  $\text{C}_{19}\text{H}_{25}\text{NO}_2\text{SNa}$   $[\text{M}+\text{Na}]^+$ : 354.1504, Found: 354.1511.

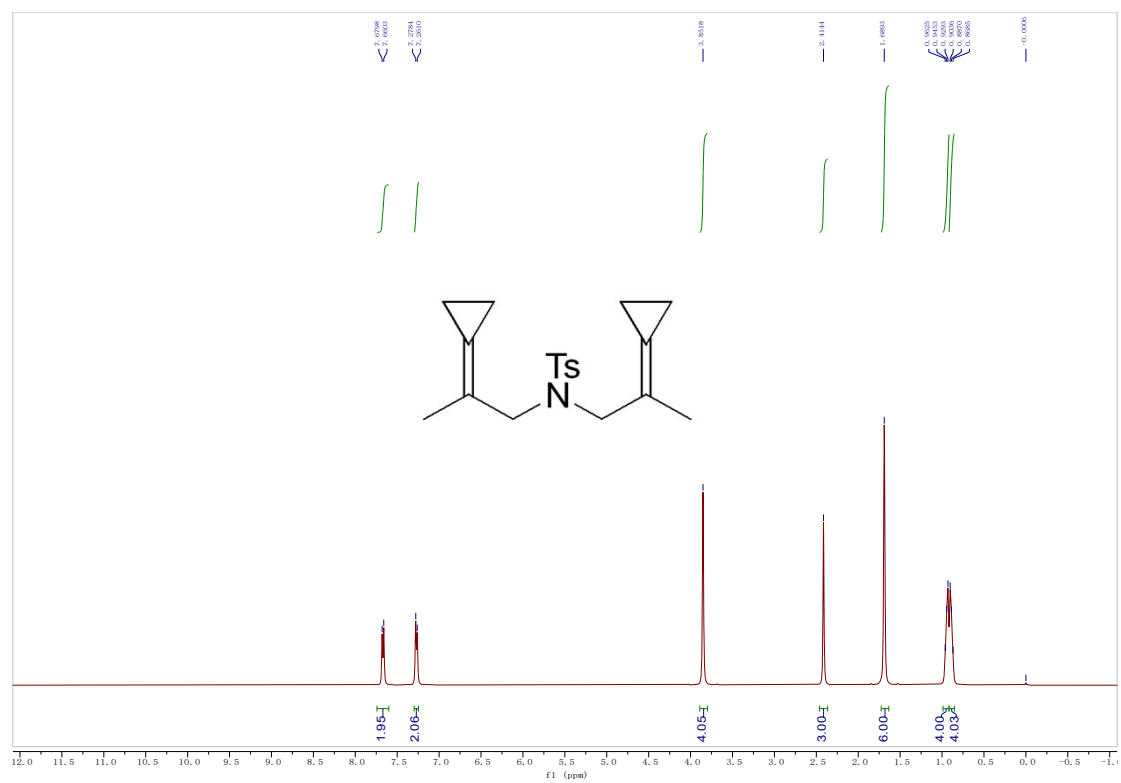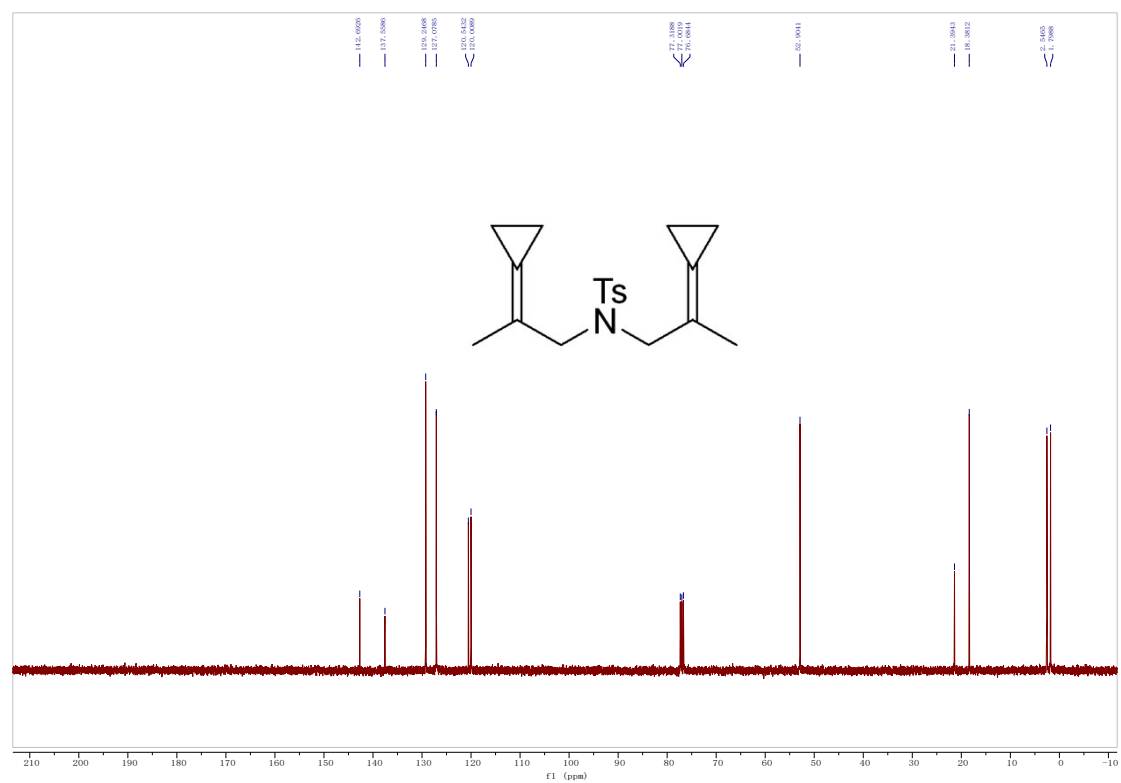

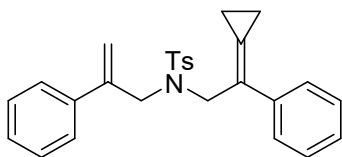

**Compound 1t:** Yield: 398 mg, 88%; A white solid; M.p.: 125 - 127 °C;  $^1\text{H}$  NMR (400 MHz,  $\text{CDCl}_3$ )  $\delta$  7.67 (d,  $J = 7.8$  Hz, 2H), 7.51 (d,  $J = 7.4$  Hz, 2H), 7.31 – 7.18 (m, 8H), 7.18 – 7.12 (m, 2H), 5.21 (s, 1H), 5.06 (s, 1H), 4.41 (s, 2H), 4.09 (s, 2H), 2.44 (s, 3H), 1.28 – 1.19 (m, 2H), 1.04 – 0.95 (m, 2H);  $^{13}\text{C}$  NMR (100 MHz,  $\text{CDCl}_3$ )  $\delta$  143.1, 142.3, 139.3, 137.9, 136.3, 129.5, 128.1, 128.0, 127.5, 127.3, 127.1, 126.8, 126.0, 125.9, 121.9, 114.8, 51.5, 51.2, 21.5, 4.9, 1.6; IR (neat):  $\nu$  3054, 1711, 1597, 1444, 1388, 1160, 1091, 815, 773  $\text{cm}^{-1}$ ; HRMS (ESI - TOF) Calcd. for  $\text{C}_{27}\text{H}_{27}\text{NO}_2\text{SNa}$   $[\text{M}+\text{Na}]^+$ : 452.1655, Found: 452.1659.

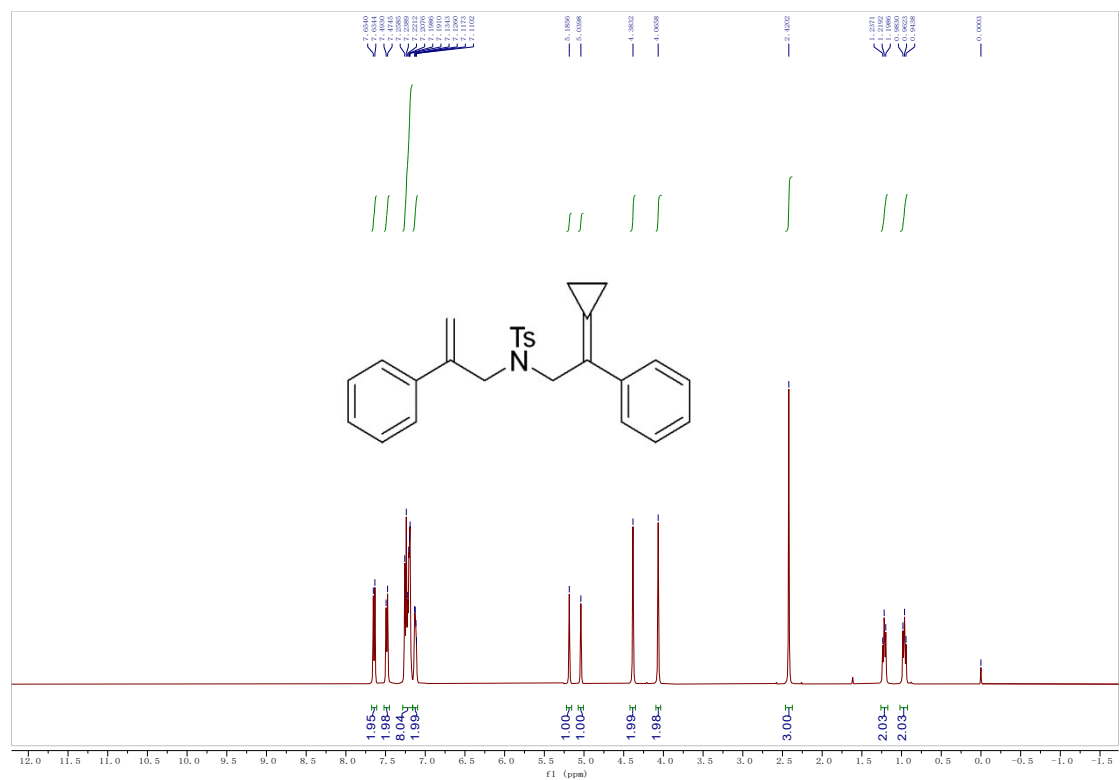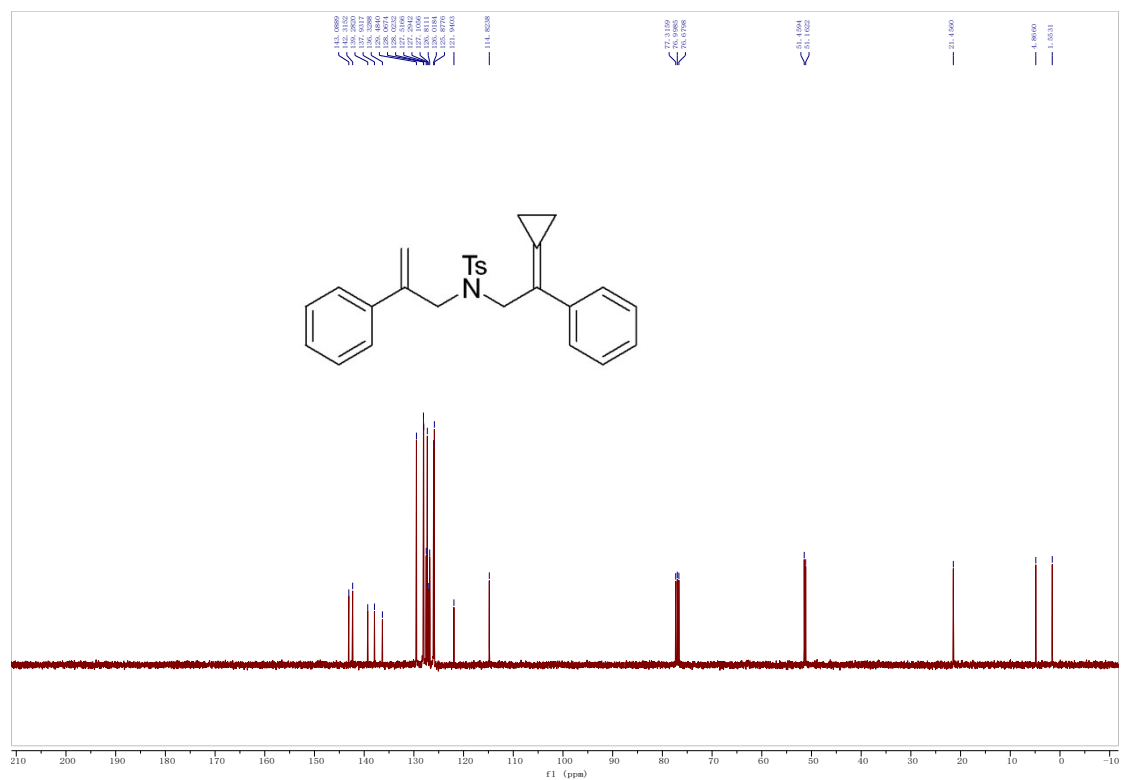

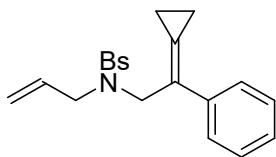

**Compound 1u:** Yield: 304 mg, 69%; A yellow solid; M.p.: 136 - 138 °C;  $^1\text{H}$  NMR (400 MHz,  $\text{CDCl}_3$ )  $\delta$  7.63 – 7.53 (m, 6H), 7.31 (t,  $J = 7.5$  Hz, 2H), 7.27 – 7.19 (m, 1H), 5.57 – 5.39 (m, 1H), 5.01 – 4.91 (m, 2H), 4.40 (s, 2H), 3.68 (d,  $J = 6.3$  Hz, 2H), 1.38 (t,  $J = 7.9$  Hz, 2H), 1.13 (t,  $J = 7.9$  Hz, 2H);  $^{13}\text{C}$  NMR (100 MHz,  $\text{CDCl}_3$ )  $\delta$  139.1, 137.6, 132.4, 132.2, 128.9, 128.3, 127.3, 127.2, 127.1, 126.4, 122.1, 118.3, 50.1, 49.3, 4.8, 1.2; IR (neat):  $\nu$  2913, 1574, 1346, 1162, 1088, 1067, 1008, 901, 823, 732, 695  $\text{cm}^{-1}$ ; HRMS (ESI - TOF) Calcd. for  $\text{C}_{20}\text{H}_{20}\text{NO}_2\text{SNaBr}$   $[\text{M}+\text{Na}]^+$ : 440.0290, Found: 440.0297.

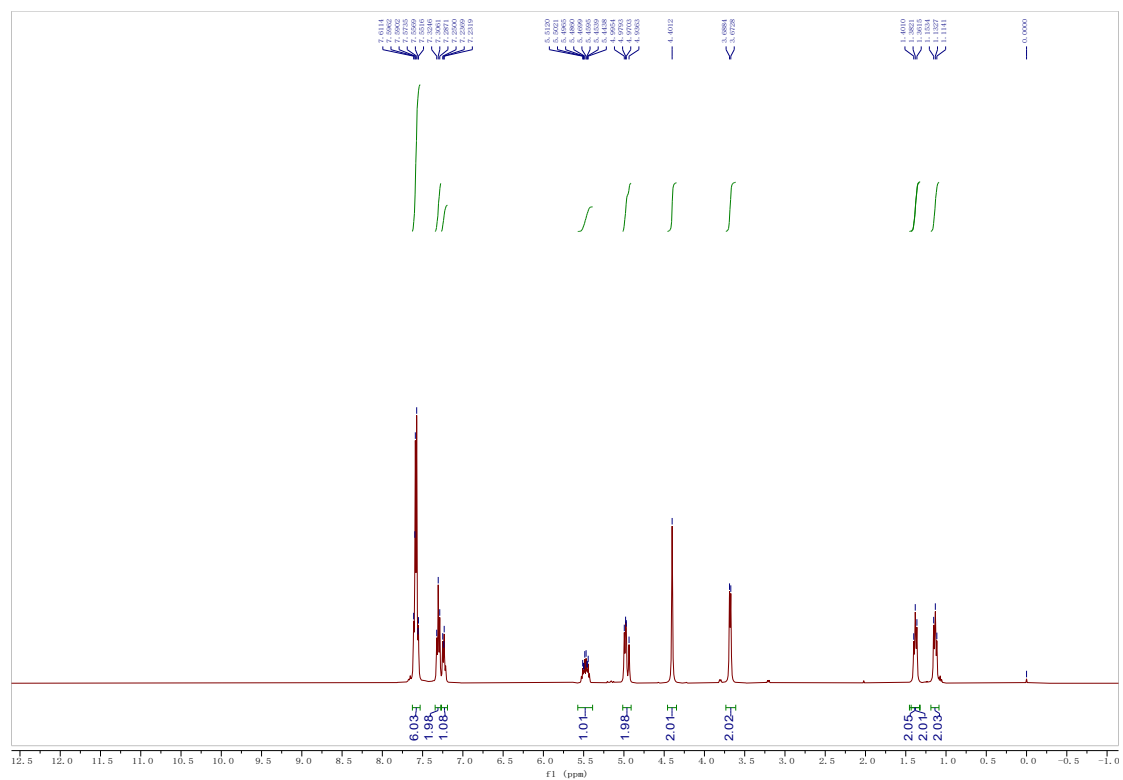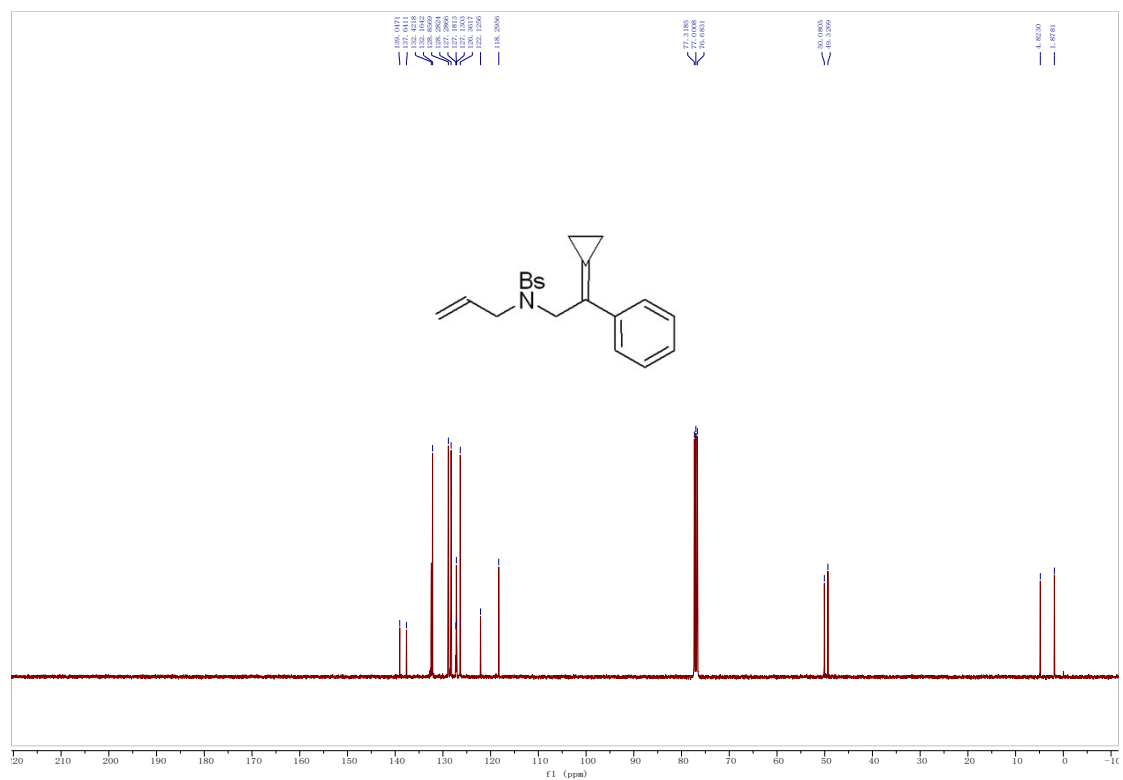



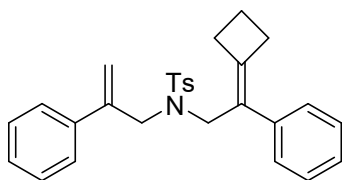

**Compound 1v:** Yield: 401 mg, 86%; A white solid; M.p.: 138 - 140 °C;  $^1\text{H}$  NMR (400 MHz,  $\text{CDCl}_3$ )  $\delta$  7.51 (d,  $J = 8.2$  Hz, 2H), 7.32 – 7.24 (m, 5H), 7.22 – 7.08 (m, 5H), 6.97 – 6.88 (m, 2H), 5.36 (s, 1H), 5.13 (s, 1H), 4.18 (s, 2H), 4.03 (s, 2H), 2.76 (t,  $J = 7.5$  Hz, 2H), 2.64 (t,  $J = 7.9$  Hz, 2H), 2.42 (s, 3H), 1.92 – 1.80 (m, 2H);  $^{13}\text{C}$  NMR (100 MHz,  $\text{CDCl}_3$ )  $\delta$  145.3, 142.8, 142.4, 139.4, 137.7, 137.2, 129.3, 128.3, 127.9, 127.7, 127.5, 127.3, 126.3, 126.3, 125.3, 114.7, 50.3, 46.5, 31.8, 30.8, 21.5, 16.7; IR (neat):  $\nu$  2916, 2001, 1260, 1157, 1093, 1019, 802, 762, 700, 652  $\text{cm}^{-1}$ ; HRMS (ESI - TOF) Calcd. for  $\text{C}_{28}\text{H}_{29}\text{NO}_2\text{SNa}$   $[\text{M}+\text{Na}]^+$ : 466.1811, Found: 466.1817.

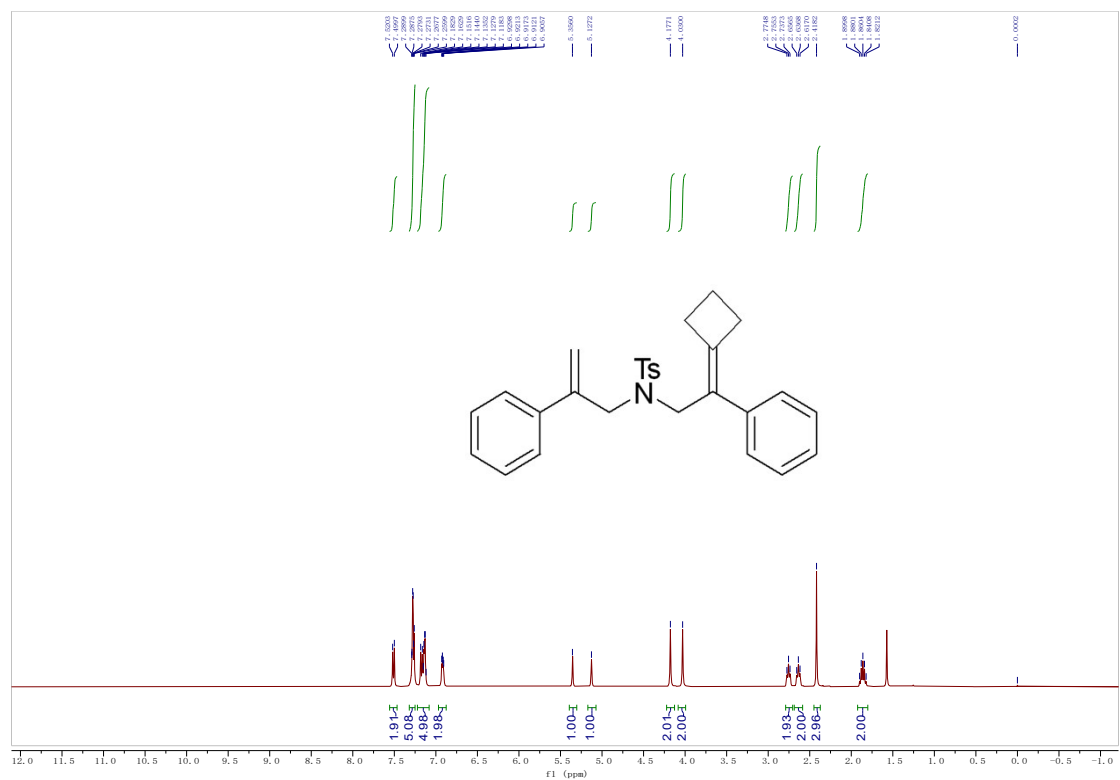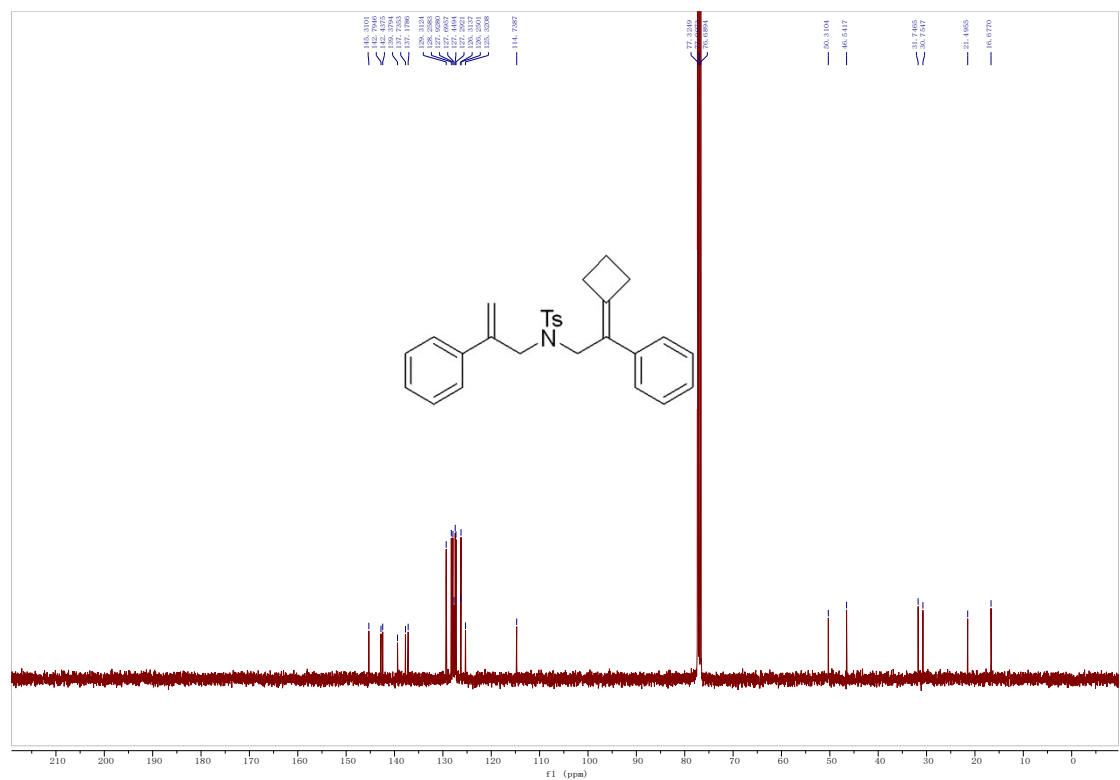

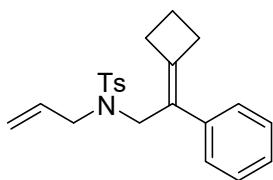

**Compound 1w:** Yield: 297 mg, 75%; A white solid; M.p.: 128 - 130 °C;  $^1\text{H}$  NMR (400 MHz,  $\text{CDCl}_3$ )  $\delta$  7.53 (d,  $J = 8.3$  Hz, 2H), 7.26 – 7.24 (m, 2H), 7.22 – 7.16 (m, 3H), 7.16 – 7.10 (m, 2H), 5.64 – 5.45 (m, 1H), 5.12 – 4.99 (m, 2H), 4.13 (s, 2H), 3.60 (d,  $J = 6.1$  Hz, 2H), 2.85 – 2.71 (m, 4H), 2.40 (s, 3H), 2.01 – 1.89 (m, 2H);  $^{13}\text{C}$  NMR (100 MHz,  $\text{CDCl}_3$ )  $\delta$  144.4, 142.9, 137.5, 137.1, 133.1, 129.4, 128.0, 127.7, 127.4, 126.5, 125.4, 118.2, 49.0, 45.9, 31.9, 30.7, 21.5, 16.8; IR (neat):  $\nu$  2956, 2011, 1187, 1031, 852, 756, 705, 649  $\text{cm}^{-1}$ ; HRMS (ESI - TOF) Calcd. for  $\text{C}_{28}\text{H}_{29}\text{NO}_2\text{SNa}$   $[\text{M}+\text{Na}]^+$ : 390.1504, Found: 390.1516.

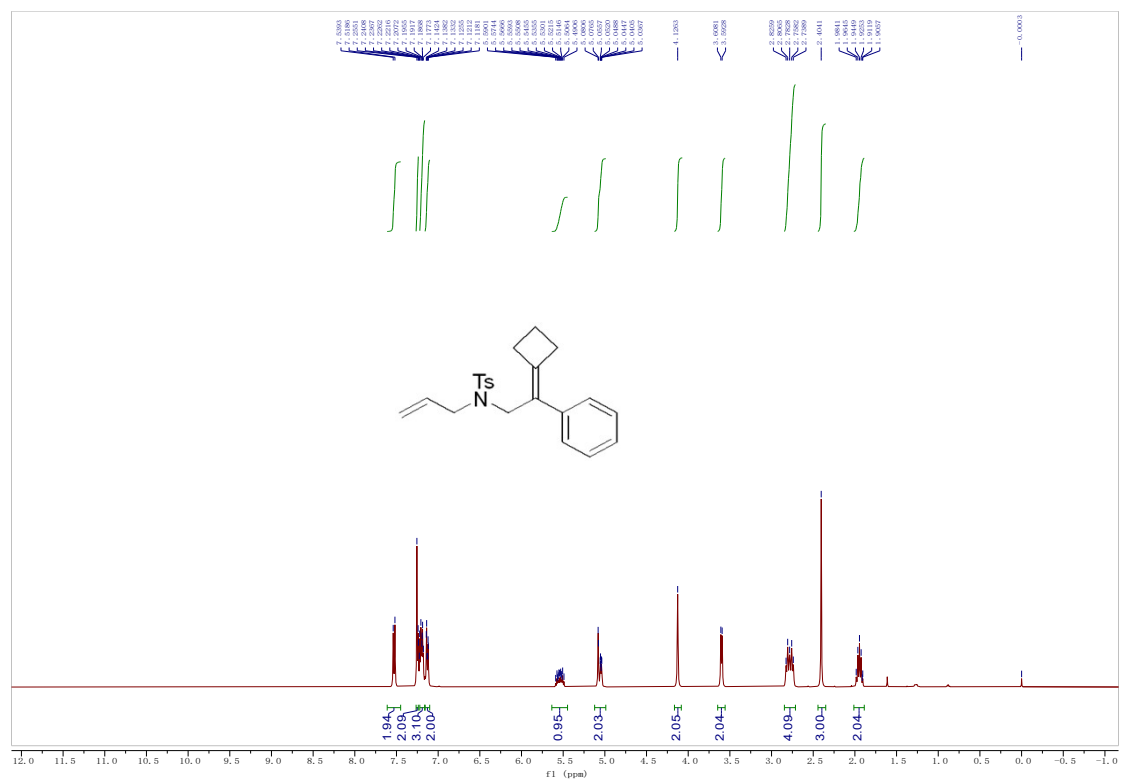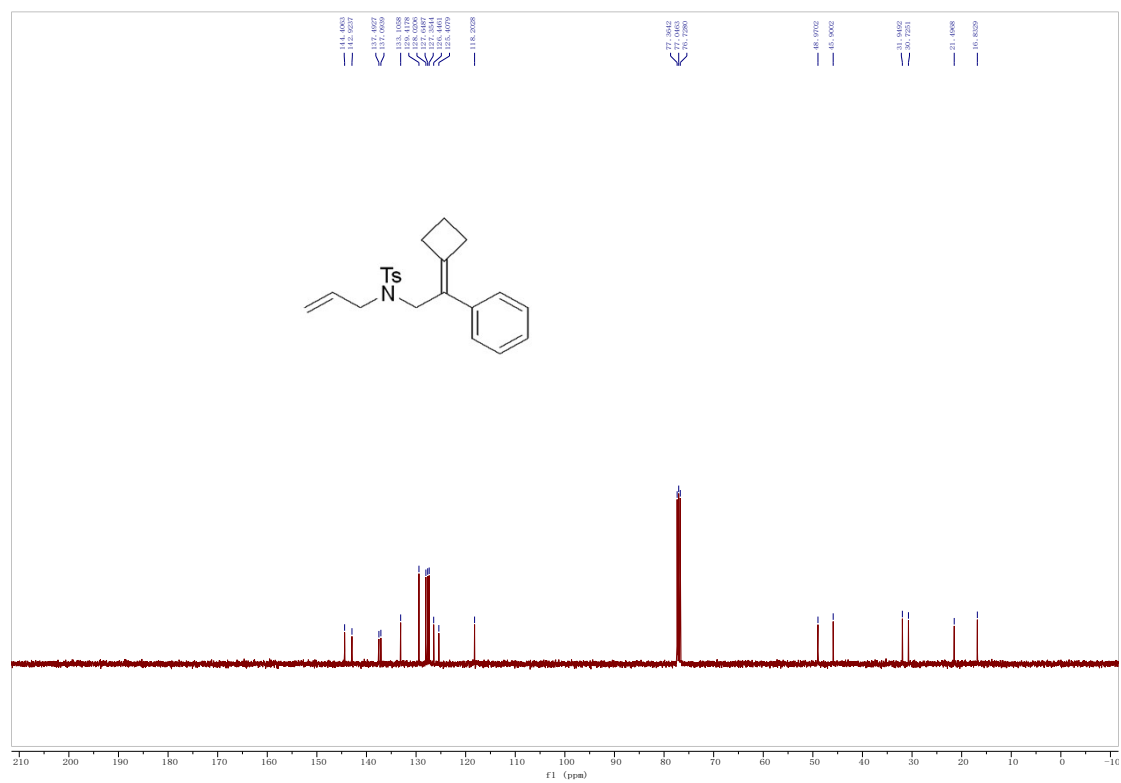

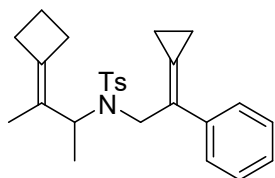

**Compound 1x:** Yield: 360 mg, 81%; A white solid; M.p.: 120 - 122 °C;  $^1\text{H}$  NMR (400 MHz,  $\text{CDCl}_3$ )  $\delta$  7.65 (d,  $J = 8.3$  Hz, 2H), 7.60 – 7.53 (m, 2H), 7.34 – 7.27 (m, 2H), 7.24 – 7.18 (m, 3H), 4.66 (d,  $J = 15.0$  Hz, 1H), 4.42 (q,  $J = 7.2$  Hz, 1H), 4.23 (d,  $J = 15.0$  Hz, 1H), 2.70 – 2.57 (m, 1H), 2.51 – 2.41 (m, 2H), 2.40 (s, 3H), 2.39 – 2.35 (m, 1H), 1.85 – 1.73 (m, 2H), 1.42 – 1.34 (m, 1H), 1.34 – 1.24 (m, 3H), 1.02 (d,  $J = 7.2$  Hz, 3H), 0.95 (s, 3H);  $^{13}\text{C}$  NMR (100 MHz,  $\text{CDCl}_3$ )  $\delta$  142.6, 138.5, 138.3, 138.0, 129.1, 127.8, 127.1, 126.6, 126.3, 125.0, 124.5, 124.2, 56.1, 47.9, 30.6, 30.3, 21.4, 16.3, 16.2, 14.3, 4.1, 2.1; IR (neat):  $\nu$  2972, 1744, 1440, 1336, 1159, 1090, 903, 816, 661  $\text{cm}^{-1}$ ; HRMS (ESI - TOF) Calcd. for  $\text{C}_{26}\text{H}_{31}\text{NO}_2\text{SNa}$   $[\text{M}+\text{Na}]^+$ : 444.1968, Found: 444.1974.

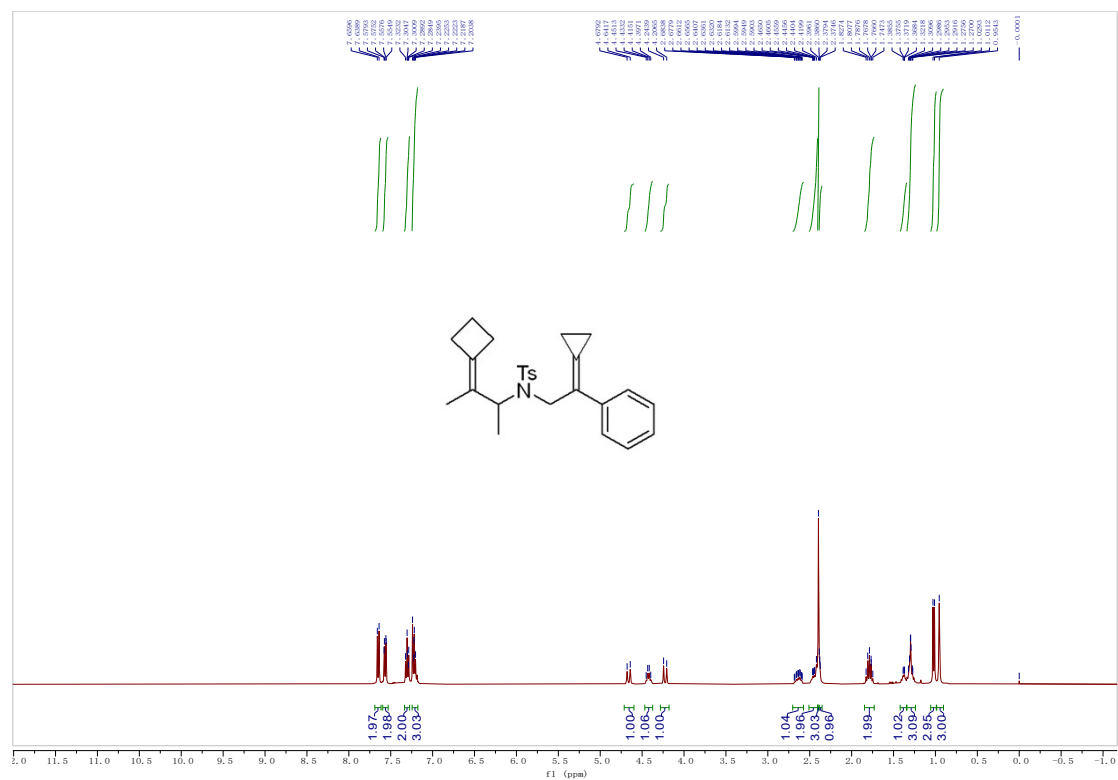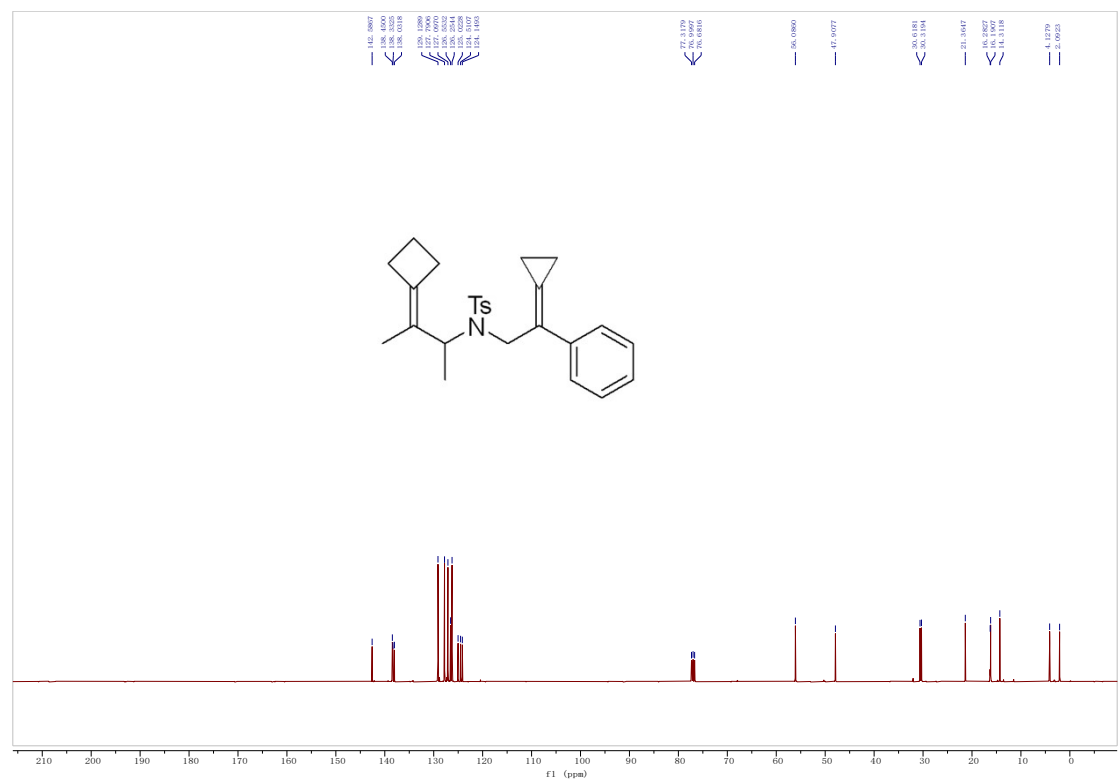

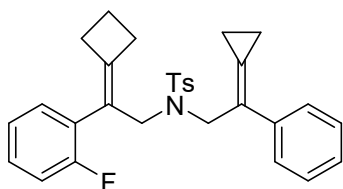

**Compound 1y:** Yield: 449 mg, 87%; A white solid; M.p.: 124 - 126 °C;  $^1\text{H}$  NMR (400 MHz,  $\text{CDCl}_3$ )  $\delta$  7.5 – 7.5 (m, 4H), 7.3 – 7.2 (m, 3H), 7.2 (d,  $J$  = 8.0 Hz, 2H), 7.1 – 7.0 (m, 1H), 6.9 – 6.7 (m, 2H), 6.7 – 6.6 (m, 1H), 4.3 (s, 2H), 4.0 (s, 2H), 2.7 – 2.6 (m, 2H), 2.4 (s, 3H), 2.4 – 2.3 (m, 2H), 1.9 – 1.7 (m, 2H), 1.3 – 1.2 (m, 2H), 1.1 – 1.0 (m, 2H);  $^{13}\text{C}$  NMR (100 MHz,  $\text{CDCl}_3$ )  $\delta$  160.9, 158.5 (d,  $J$  = 224.2 Hz), 146.4, 142.6, 138.4, 137.0, 130.74, 130.69 (d,  $J$  = 4.5 Hz), 129.3, 128.13, 128.05 (d,  $J$  = 8.1 Hz), 127.98, 127.1, 126.7, 126.2, 125.7, 125.6 (d,  $J$  = 15.5 Hz), 125.4, 123.4, 123.3 (d,  $J$  = 3.4 Hz), 122.5, 121.5, 115.3, 115.1 (d,  $J$  = 22.5 Hz), 51.1, 47.91, 47.88, 30.71, 30.69, 30.0, 21.4, 16.3, 4.3, 1.9;  $^{19}\text{F}$  NMR (376 MHz,  $\text{CDCl}_3$ )  $\delta$  -114.3; IR (neat):  $\nu$  2968, 1814, 1387, 1269, 1052, 934, 626  $\text{cm}^{-1}$ ; HRMS (ESI - TOF) Calcd. for  $\text{C}_{30}\text{H}_{30}\text{NO}_2\text{SNaF}$   $[\text{M}+\text{Na}]^+$ : 510.1874, Found: 510.1882.

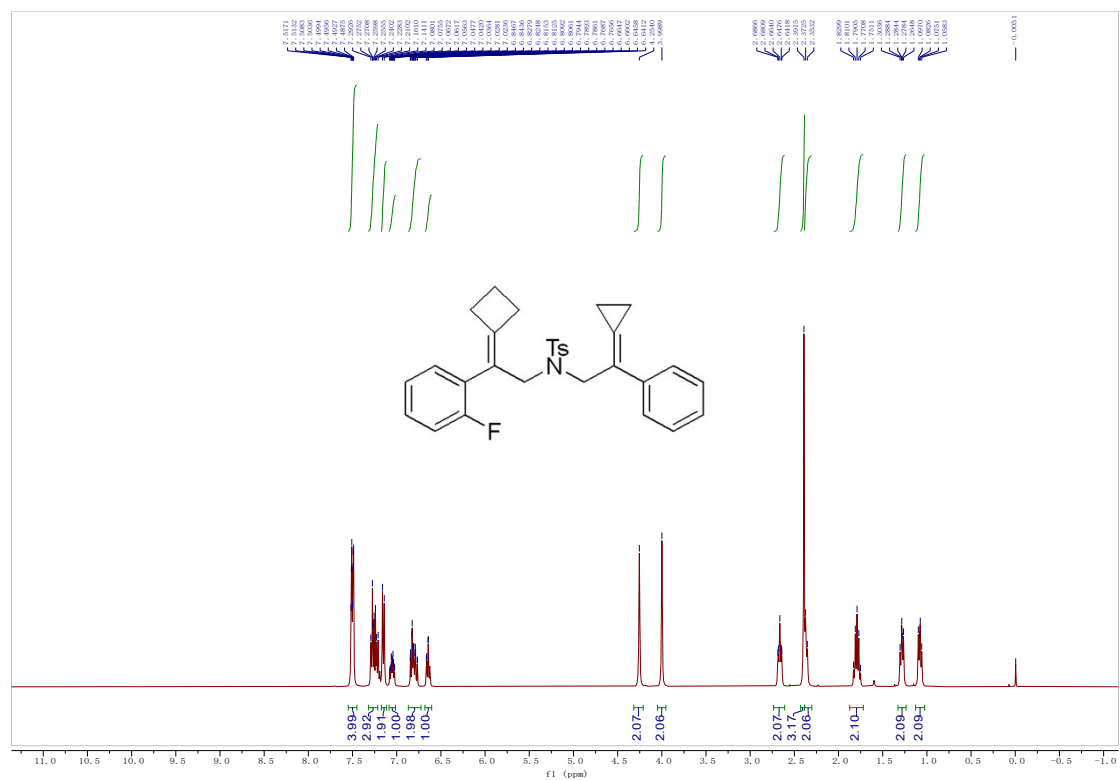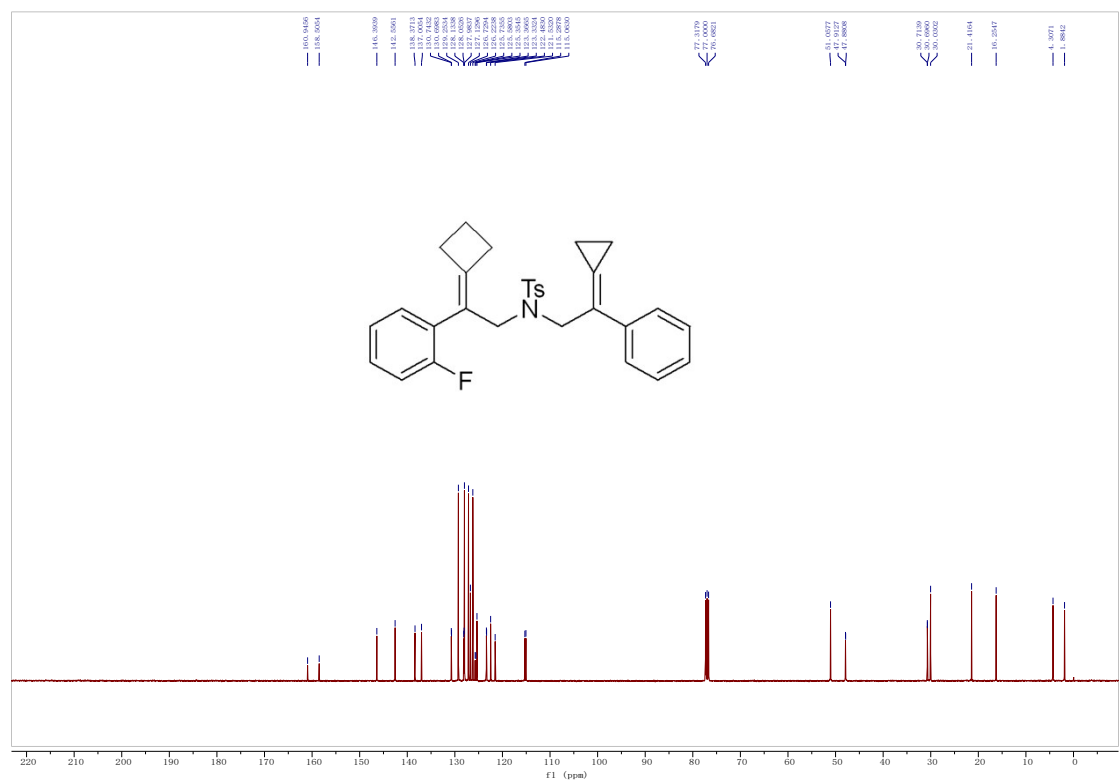



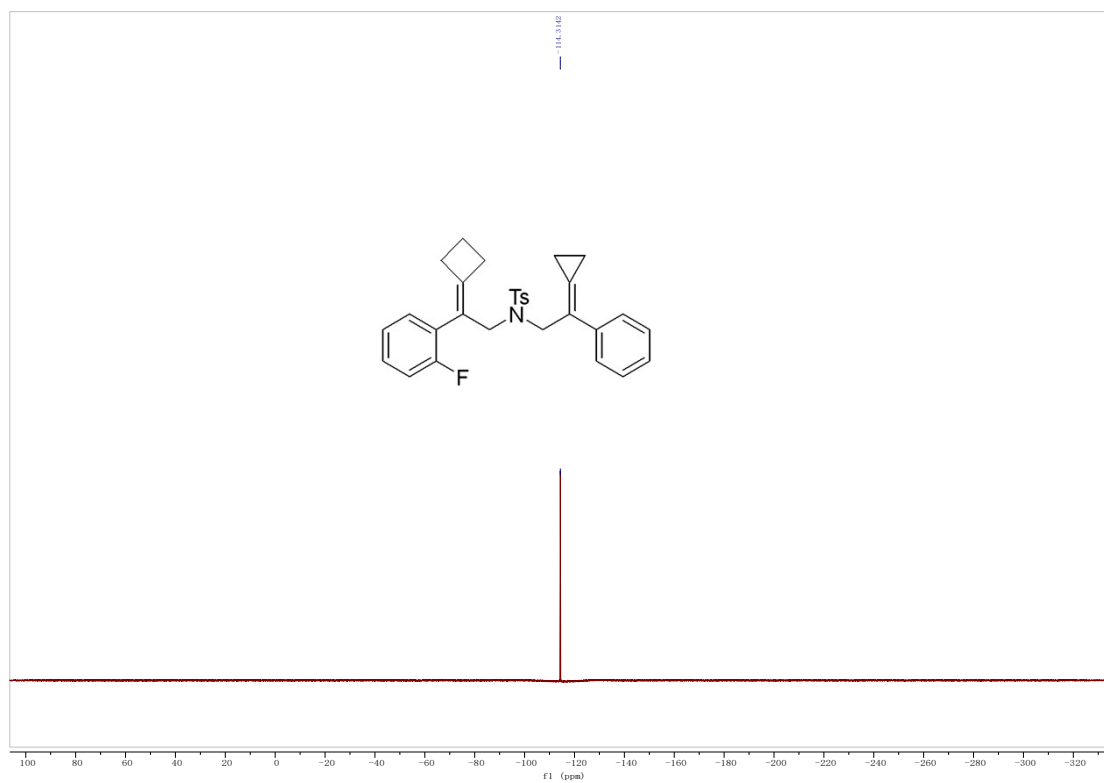

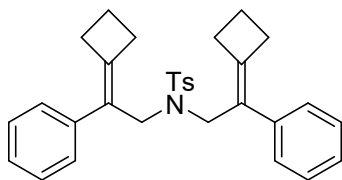

**Compound 1z:** Yield: 420 mg, 83%; A white solid; M.p.: 164 - 166 °C;  $^1\text{H}$  NMR (400 MHz,  $\text{CDCl}_3$ )  $\delta$  7.44 (d,  $J = 7.9$  Hz, 2H), 7.23 – 7.08 (m, 8H), 6.98 (d,  $J = 7.1$  Hz, 4H), 3.97 (s, 4H), 2.80 – 2.61 (m, 8H), 2.40 (s, 3H), 1.94 – 1.78 (m, 4H);  $^{13}\text{C}$  NMR (100 MHz,  $\text{CDCl}_3$ )  $\delta$  144.1, 142.6, 138.0, 137.1, 129.2, 127.8, 127.5, 127.4, 126.1, 125.7, 47.7, 32.1, 30.7, 21.5, 16.9; IR (neat):  $\nu$  2968, 1805, 1503, 1305, 1164, 1112, 934, 625  $\text{cm}^{-1}$ ; HRMS (ESI - TOF) Calcd. for  $\text{C}_{31}\text{H}_{33}\text{NO}_2\text{SNaF}$   $[\text{M}+\text{Na}]^+$ : 506.2130, Found: 506.2133.

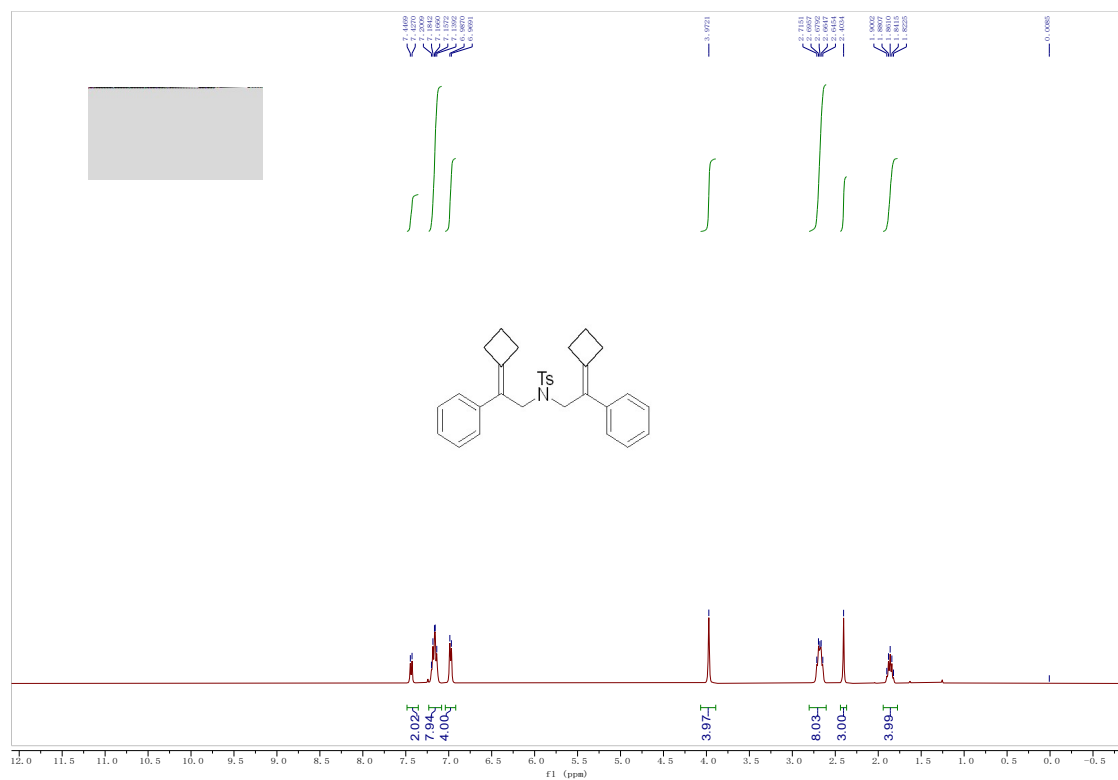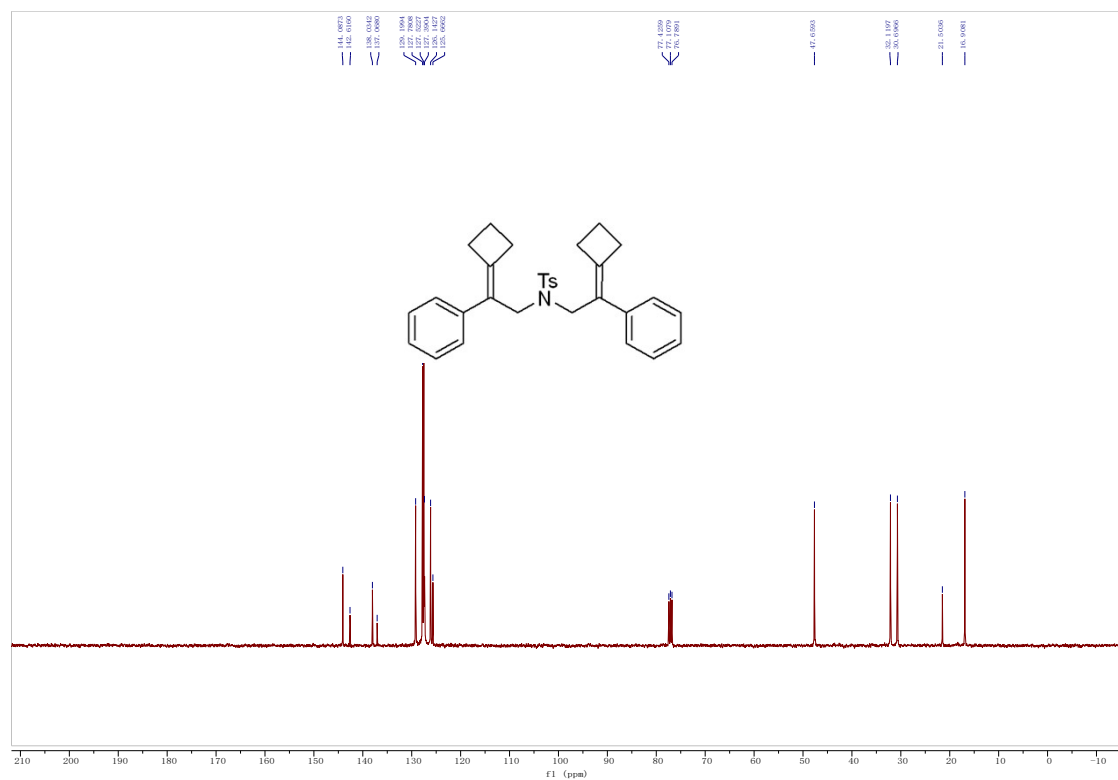

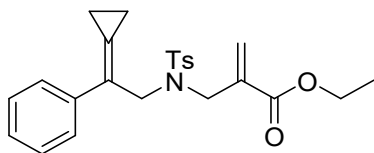

**Compound 1aa:** Yield: 285 mg, 67%; Colorless oil;  $^1\text{H}$  NMR (400 MHz,  $\text{CDCl}_3$ )  $\delta$  7.68 (d,  $J$  = 8.0 Hz, 2H), 7.61 (d,  $J$  = 8.0 Hz, 2H), 7.33 – 7.24 (m, 4H), 7.24 – 7.18 (m, 1H), 5.99 (s, 1H), 5.56 (s, 1H), 4.36 (s, 2H), 4.08 (q,  $J$  = 7.1 Hz, 2H), 3.85 (s, 2H), 2.42 (s, 3H), 1.38 – 1.32 (m, 2H), 1.21 (t,  $J$  = 7.1 Hz, 3H), 1.11 – 1.05 (m, 2H).  $^{13}\text{C}$  NMR (100 MHz,  $\text{CDCl}_3$ )  $\delta$  165.8, 143.3, 137.5, 135.6, 134.9, 129.6, 128.1, 127.5, 127.2, 126.9, 126.8, 126.1, 121.9, 60.5, 52.6, 47.4, 21.4, 14.0, 5.2, 1.2; IR (neat):  $\nu$  2966, 1849, 1749, 1722, 1486, 1343, 1298, 1245, 1184, 769  $\text{cm}^{-1}$ ; HRMS (ESI - TOF) Calcd. for  $\text{C}_{24}\text{H}_{27}\text{NO}_4\text{SNa}$   $[\text{M}+\text{Na}]^+$ : 448.1553, Found: 448.1553.



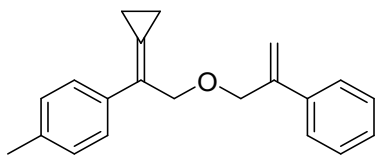

**Compound 1ab:** Yield: 245 mg, 85%; Colorless oil;  $^1\text{H}$  NMR (400 MHz,  $\text{CDCl}_3$ )  $\delta$  7.55 (d,  $J = 7.8$  Hz, 2H), 7.46 – 7.40 (m, 2H), 7.31 – 7.23 (m, 3H), 7.09 (d,  $J = 7.8$  Hz, 2H), 5.52 (s, 1H), 5.32 (s, 1H), 4.56 (s, 2H), 4.38 (s, 2H), 2.33 (s, 3H), 1.51 – 1.43 (m, 2H), 1.20 – 1.13 (m, 2H).  $^{13}\text{C}$  NMR (100 MHz,  $\text{CDCl}_3$ )  $\delta$  144.5, 138.8, 136.4, 135.4, 128.8, 128.2, 127.6, 126.2, 126.0, 125.1, 123.7, 114.5, 71.7, 71.5, 21.1, 5.1, 0.8; IR (neat):  $\nu$  2987, 1878, 1866, 1788, 1333, 1288, 1219, 1184, 785, 698  $\text{cm}^{-1}$ ; HRMS (EI - FI) Calcd. for  $\text{C}_{21}\text{H}_{22}\text{O}$   $[\text{M}]^+$ : 290.1665, Found: 290.1662.

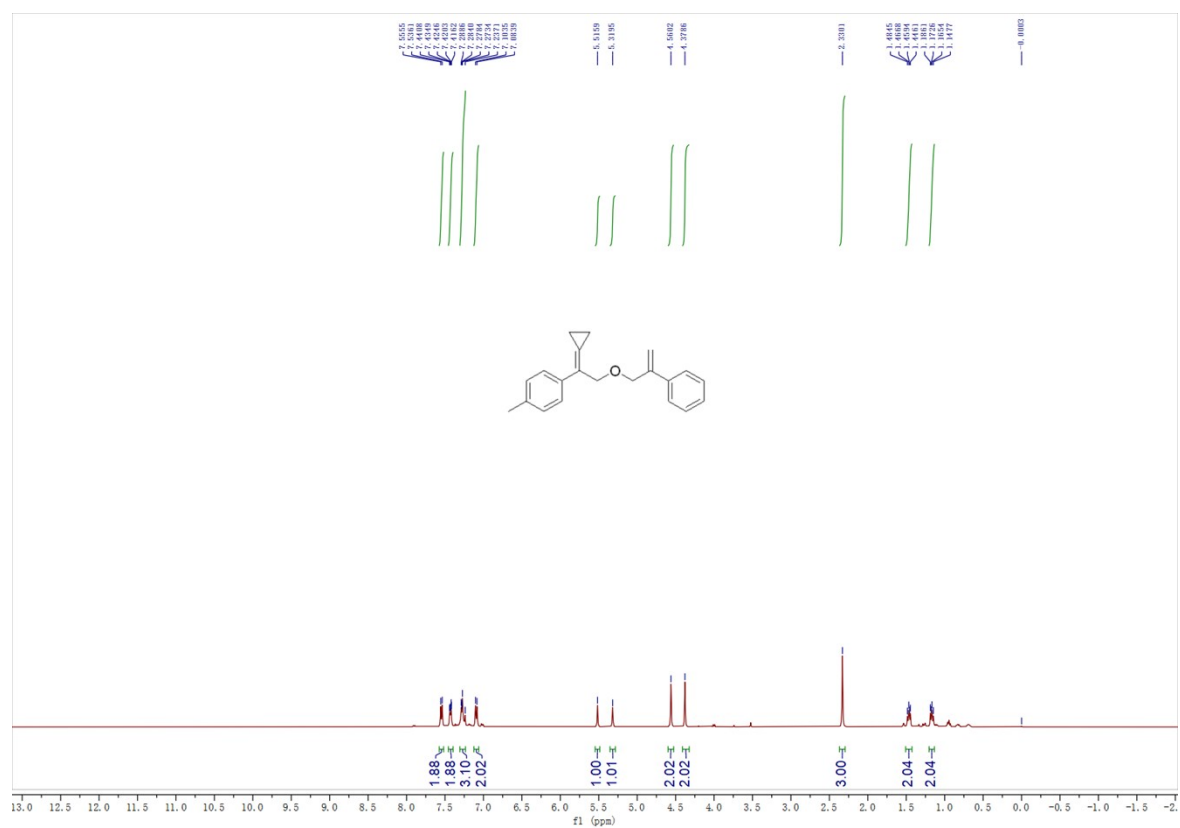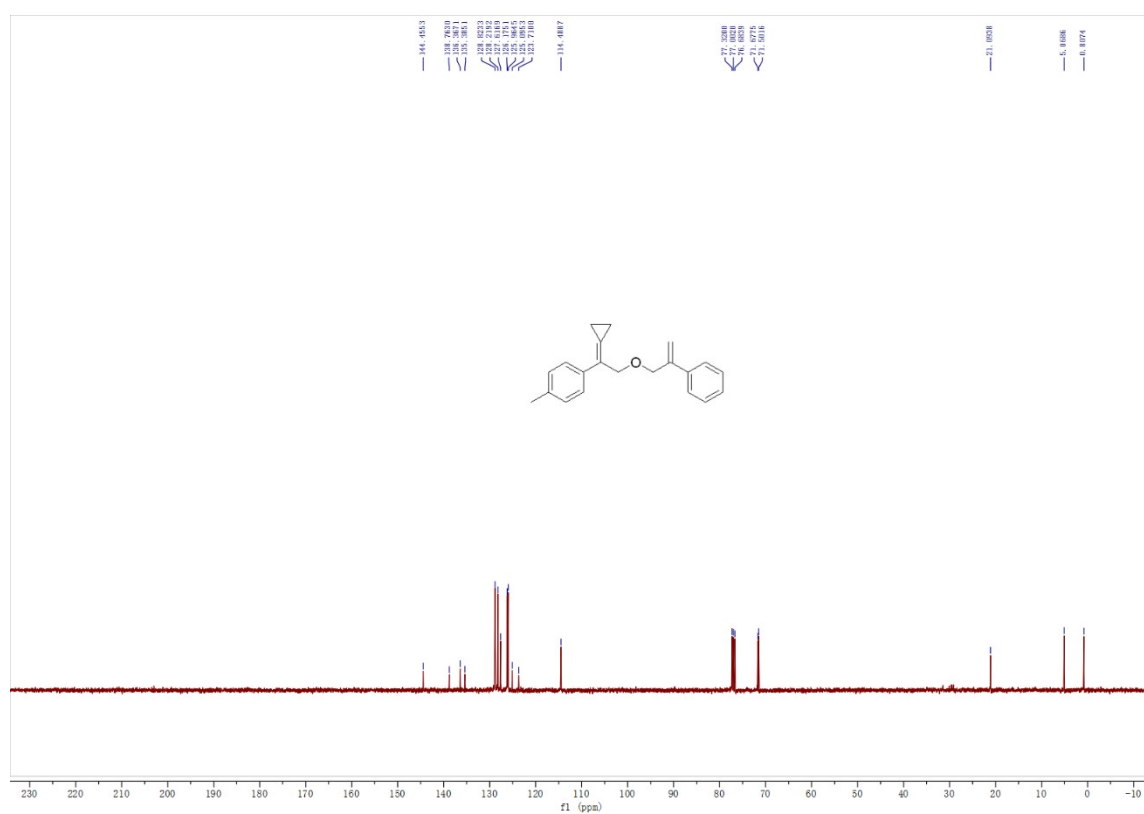

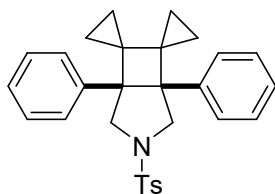

**Compound 2a:** Yield: 86.5 mg, 95%; A white solid; M.p.: 167 - 169 °C;  $^1\text{H}$  NMR (400 MHz,  $\text{CDCl}_3$ )  $\delta$  7.74 (d,  $J = 7.8$  Hz, 2H), 7.30 (d,  $J = 7.8$  Hz, 2H), 7.15 – 7.01 (m, 6H), 6.78 – 6.63 (m, 4H), 3.88 (d,  $J = 9.5$  Hz, 2H), 3.10 (d,  $J = 9.5$  Hz, 2H), 2.41 (s, 3H), 0.81 – 0.69 (m, 2H), 0.64 – 0.46 (m, 4H), 0.38 – 0.25 (m, 2H);  $^{13}\text{C}$  NMR (100 MHz,  $\text{CDCl}_3$ )  $\delta$  143.6, 140.4, 132.9, 129.7, 127.9, 127.8, 127.5, 126.2, 58.7, 57.7, 32.4, 21.6, 9.3, 8.4; IR (neat):  $\nu$  2846, 1712, 1598, 1496, 1347, 1167, 1023, 830, 816, 702  $\text{cm}^{-1}$ ; HRMS (ESI - TOF) Calcd. for  $\text{C}_{29}\text{H}_{29}\text{NO}_2\text{SNa}$   $[\text{M}+\text{Na}]^+$ : 478.1811, Found: 478.1805.



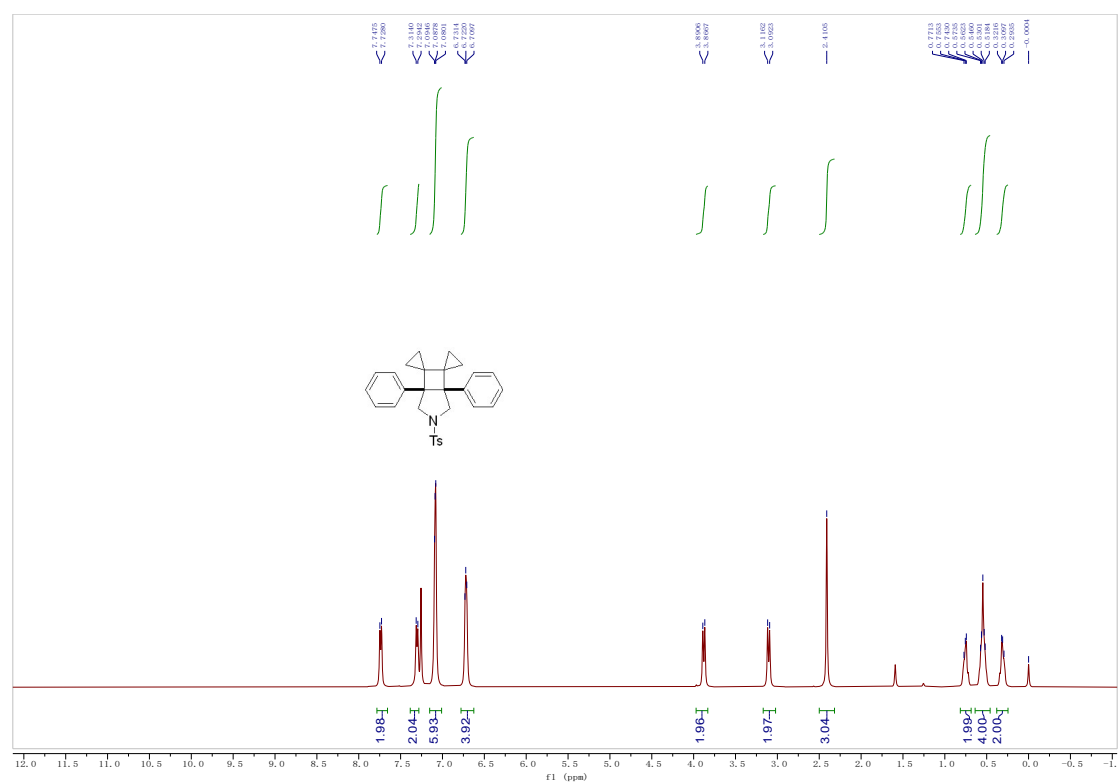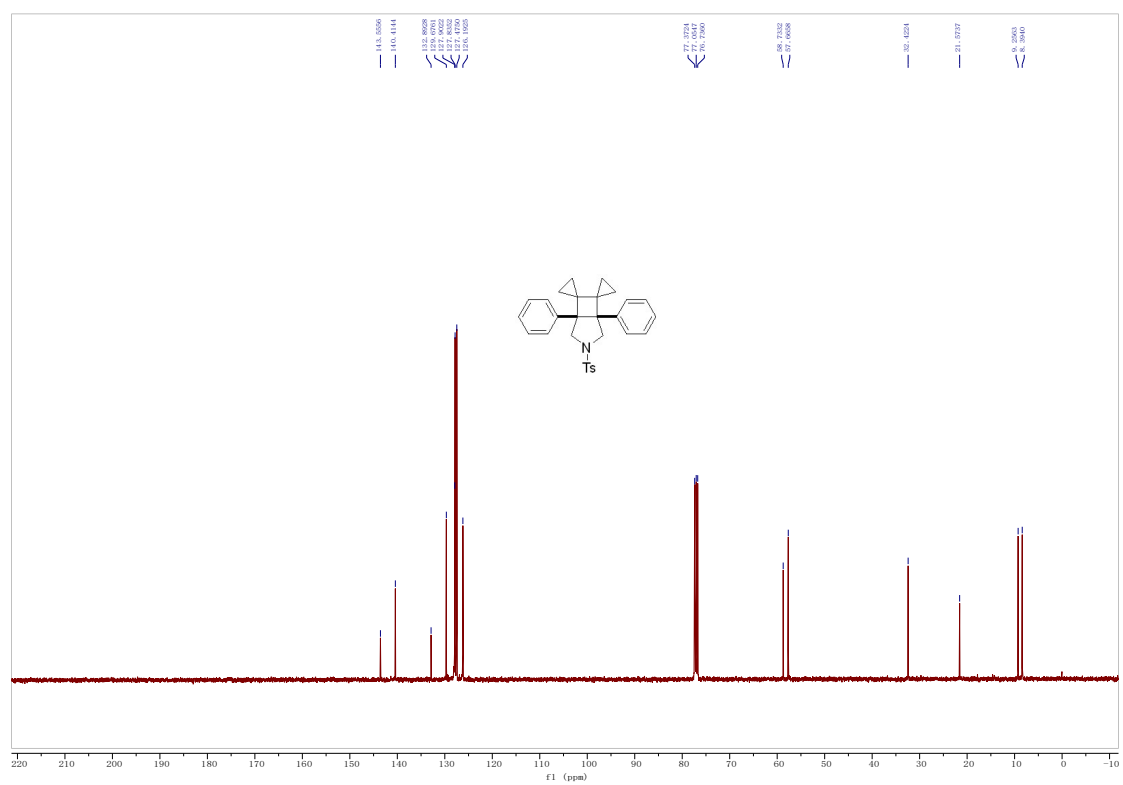

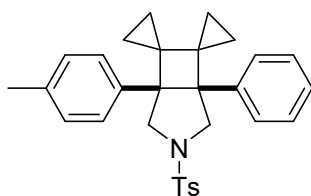

**Compound 2b:** Yield: 77.8 mg, 82%; A white solid; M.p.: 137 - 139°C;  $^1\text{H}$  NMR (400 MHz,  $\text{CDCl}_3$ )  $\delta$  7.74 (d,  $J = 7.9$  Hz, 2H), 7.30 (d,  $J = 7.9$  Hz, 2H), 7.25 – 7.14 (m, 3H), 6.89 (d,  $J = 7.8$  Hz, 2H), 6.77 – 6.75 (m, 2H), 6.57 (d,  $J = 7.8$  Hz, 2H), 3.87 (dd,  $J = 9.5, 2.4$  Hz, 2H), 3.11 – 3.04 (m, 2H), 2.41 (s, 3H), 2.23 (s, 3H), 0.77 – 0.69 (m, 2H), 0.67 – 0.44 (m, 4H), 0.42 – 0.27 (m, 2H);  $^{13}\text{C}$  NMR (100 MHz,  $\text{CDCl}_3$ )  $\delta$  143.7, 140.6, 137.4, 135.8, 132.7, 129.8, 128.6, 128.0, 127.9, 127.6, 127.4, 126.3, 58.6, 58.5, 58.0, 57.5, 32.5, 21.7, 21.1, 9.4, 8.6, 8.4; IR (neat):  $\nu$  2924, 1724, 1598, 1468, 1446, 1347, 1287, 1166, 1106, 812, 706  $\text{cm}^{-1}$ ; HRMS (ESI - TOF) Calcd. for  $\text{C}_{30}\text{H}_{32}\text{NO}_2\text{S}$   $[\text{M}+\text{H}]^+$ : 470.2148, Found: 470.2158.

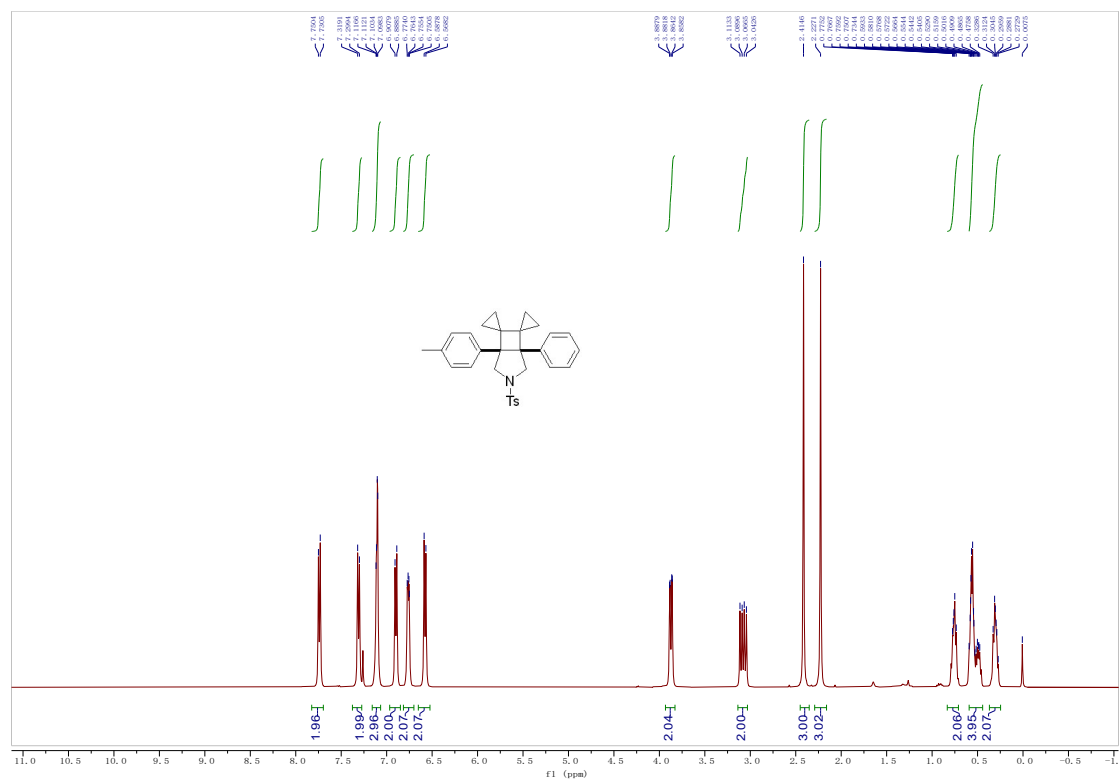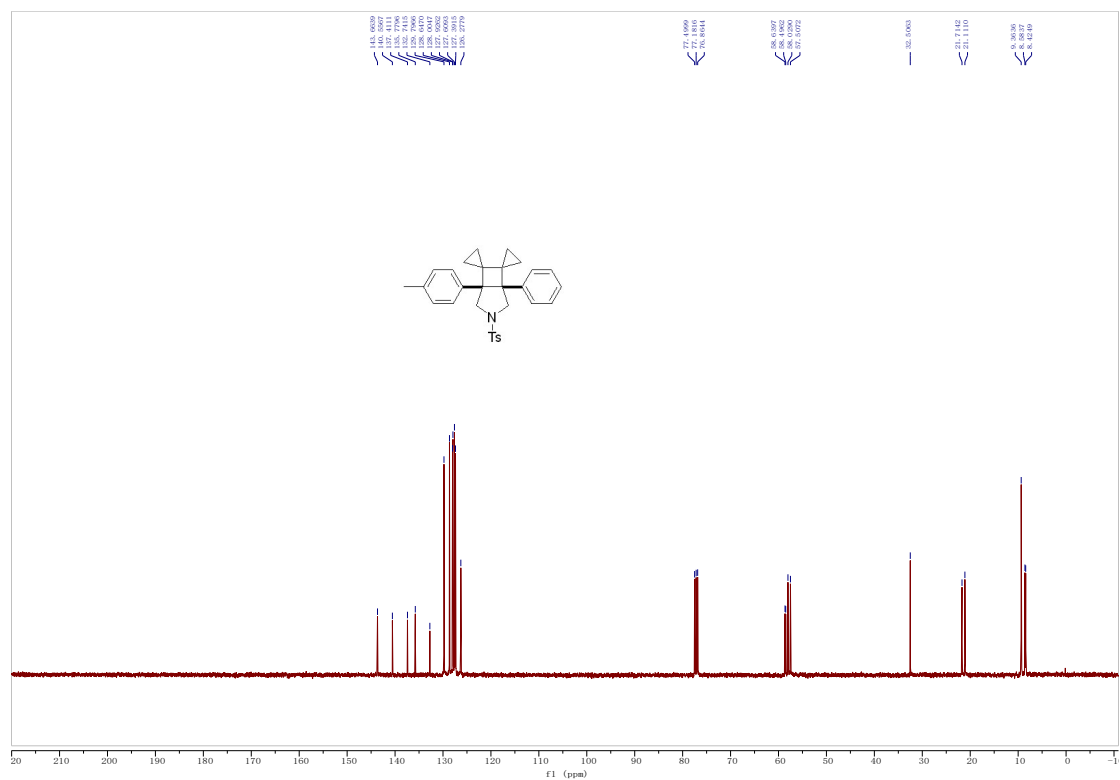

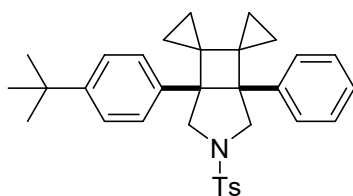

**Compound 2c:** Yield: 81.8 mg, 80%; A white solid; M.p.: 123 - 125 °C;  $^1\text{H}$  NMR (400 MHz,  $\text{CDCl}_3$ )  $\delta$  7.74 (d,  $J = 7.9$  Hz, 2H), 7.30 (d,  $J = 7.9$  Hz, 2H), 7.11 – 7.07 (m, 5H), 6.75 – 6.73 (m, 2H), 6.65 (d,  $J = 8.1$  Hz, 2H), 3.86 (d,  $J = 9.5$  Hz, 2H), 3.13 – 3.10 (m, 2H), 2.41 (s, 3H), 1.22 (s, 9H), 0.78 – 0.72 (m, 2H), 0.69 – 0.48 (m, 4H), 0.42 – 0.30 (m, 2H);  $^{13}\text{C}$  NMR (100 MHz,  $\text{CDCl}_3$ )  $\delta$  149.1, 143.6, 140.5, 137.2, 132.9, 129.8, 128.0, 127.9, 127.6, 127.1, 126.2, 124.8, 58.7, 58.5, 57.8, 57.6, 34.4, 32.5, 32.3, 31.4, 21.7, 9.41, 9.39, 8.5, 8.4; IR (neat):  $\nu$  2945, 2020, 1652, 1614, 1351, 1166, 1107, 1014, 813, 705, 664  $\text{cm}^{-1}$ ; HRMS (ESI - TOF) Calcd. for  $\text{C}_{33}\text{H}_{38}\text{NO}_2\text{S}$   $[\text{M}+\text{H}]^+$ : 512.2618, Found: 512.2622.

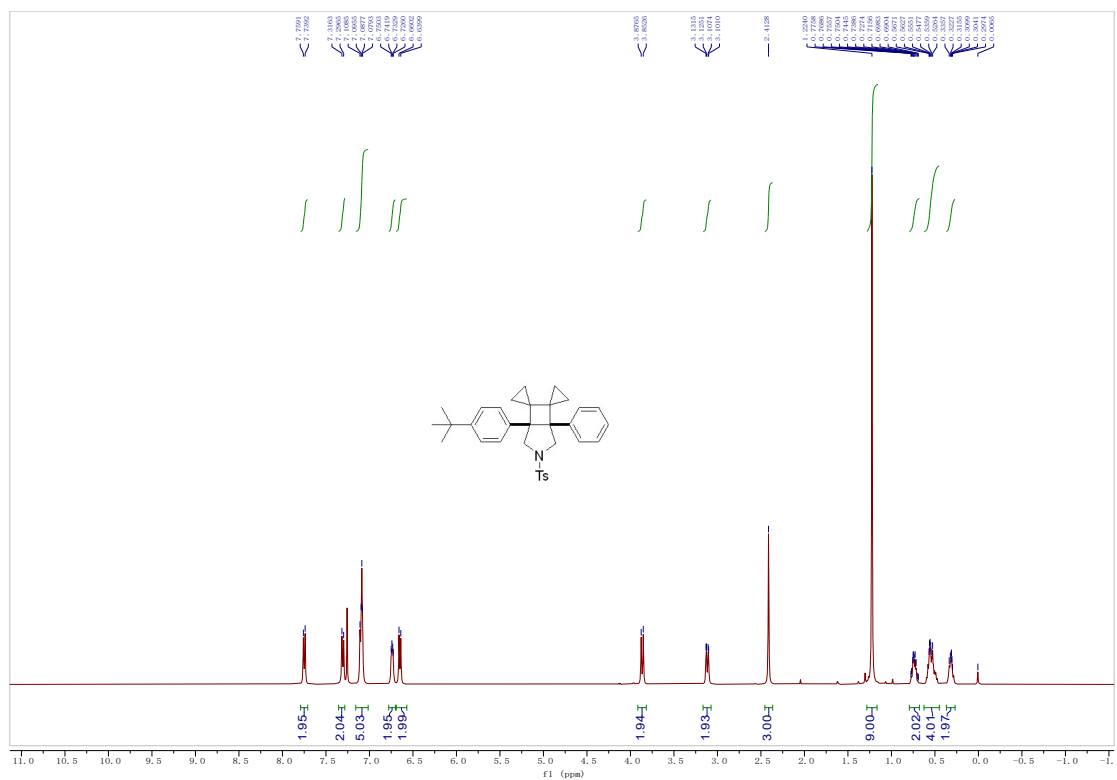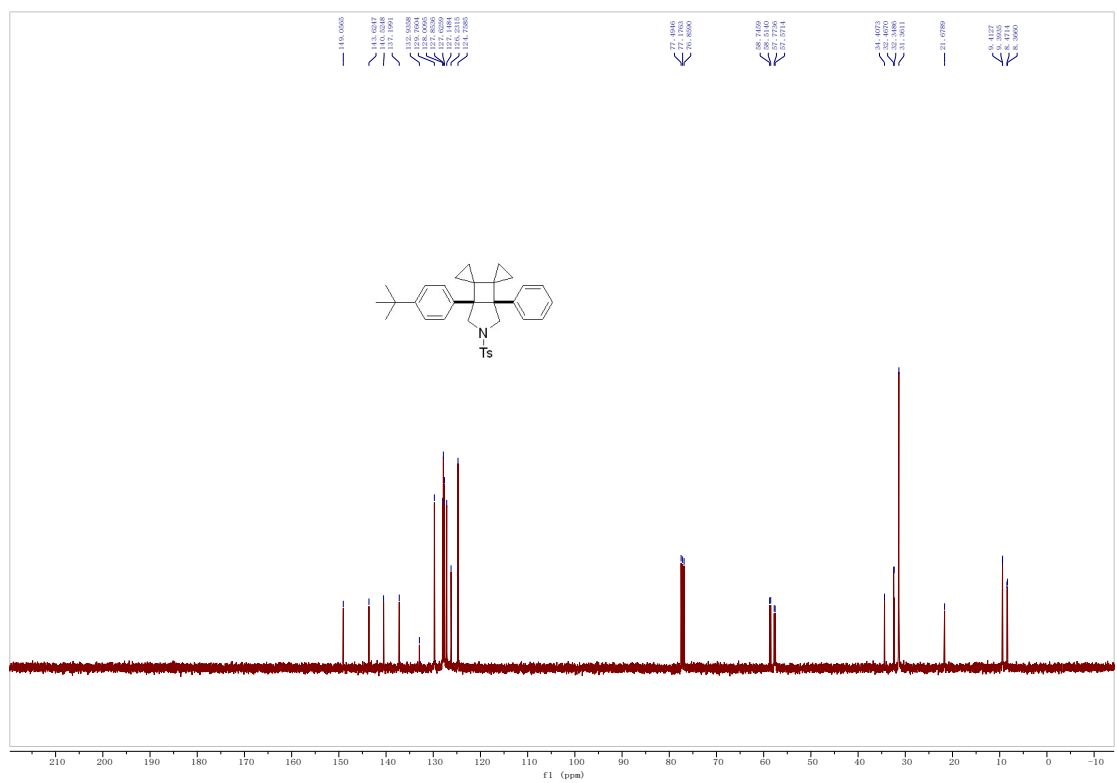

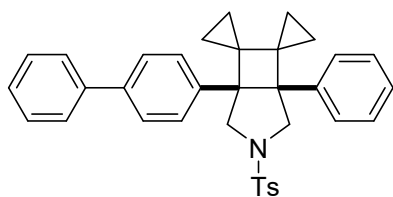

**Compound 2d:** Yield: 96.9 mg, 90%; A white solid; M.p.: 141 - 143 °C;  $^1\text{H}$  NMR (400 MHz,  $\text{CDCl}_3$ )  $\delta$  7.81 (d,  $J = 7.8$  Hz, 2H), 7.53 (d,  $J = 7.8$  Hz, 2H), 7.41 – 7.33 (m, 7H), 7.15 – 7.13 (m, 3H), 6.84 – 6.82 (m, 4H), 3.99 – 3.95 (m, 2H), 3.22 – 3.19 (m, 2H), 2.43 (s, 3H), 0.85–0.81 (m, 2H), 0.67–0.58 (m, 4H), 0.42–0.36 (m, 2H);  $^{13}\text{C}$  NMR (100 MHz,  $\text{CDCl}_3$ )  $\delta$  143.6, 140.42, 140.36, 139.5, 138.8, 132.8, 129.8, 128.8, 127.96, 127.95, 127.92, 127.6, 127.3, 126.8, 126.4, 126.3, 58.8, 58.6, 57.8, 57.6, 32.51, 32.48, 21.6, 9.4, 8.5, 8.4; IR (neat):  $\nu$  3029, 1711, 1600, 1488, 1330, 1164, 1108, 1021, 838, 765, 698  $\text{cm}^{-1}$ ; HRMS (ESI - TOF) Calcd. for  $\text{C}_{35}\text{H}_{33}\text{NO}_2\text{SNa}$   $[\text{M}+\text{Na}]^+$ : 554.2128, Found: 554.2109.

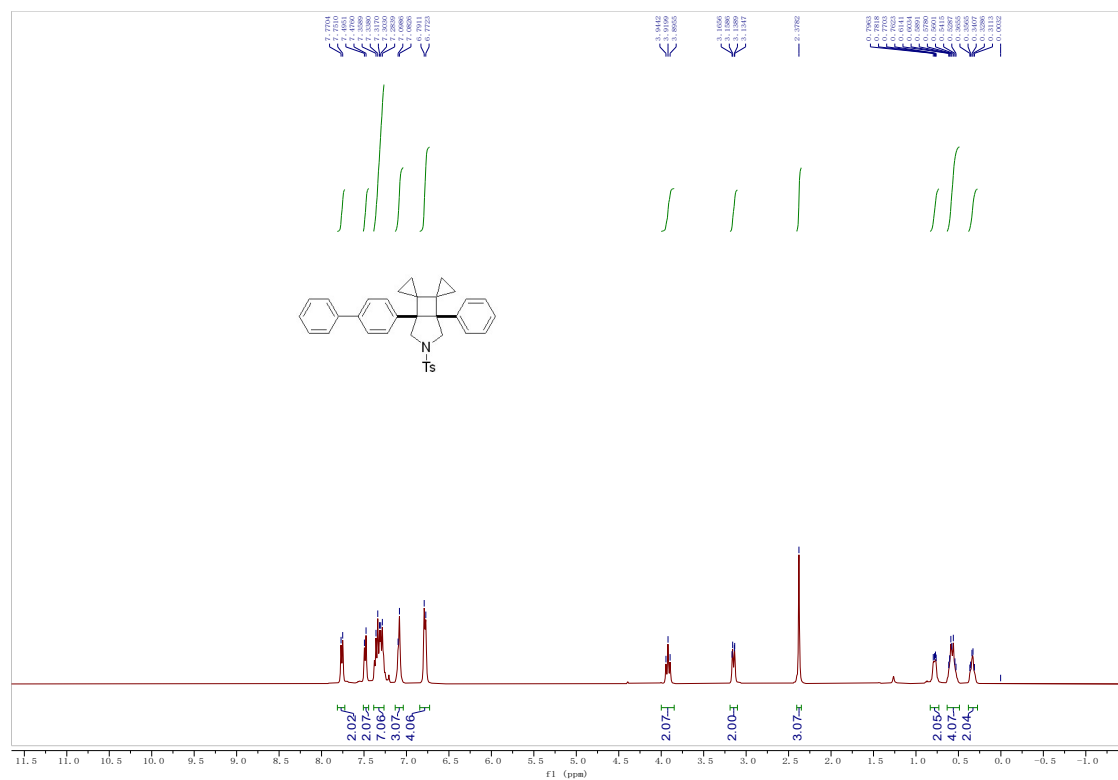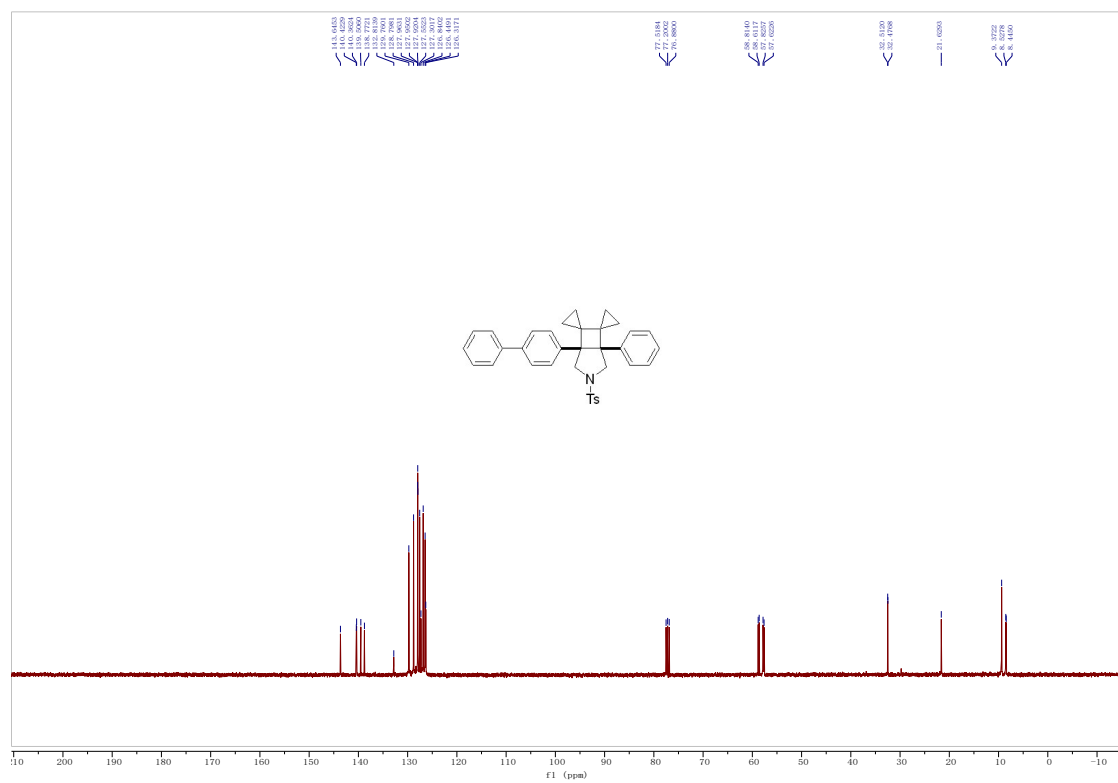

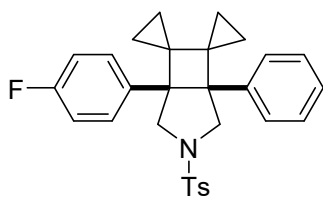

**Compound 2e:** Yield: 75.7 mg, 79%; A white solid; M.p.: 152 - 154 °C;  $^1\text{H}$  NMR (400 MHz,  $\text{CDCl}_3$ )  $\delta$  7.73 (d,  $J = 7.8$  Hz, 2H), 7.32 (d,  $J = 7.8$  Hz, 2H), 7.10 – 7.08 (m, 3H), 6.81 – 6.77 (m, 2H), 6.72 – 6.68 (m, 4H), 3.89 – 3.83 (m, 2H), 3.08 (d,  $J = 9.6$  Hz, 2H), 2.4 (s, 3H), 0.76 – 0.72 (m, 2H), 0.61 – 0.53 (m, 3H), 0.48 – 0.42 (m, 1H), 0.40 – 0.28 (m, 2H);  $^{13}\text{C}$  NMR (100 MHz,  $\text{CDCl}_3$ )  $\delta$  162.3, 159.9 (d,  $J = 244.3$  Hz), 143.6, 140.2, 136.18, 136.15 (d,  $J = 3.4$  Hz), 132.8, 129.7, 129.1, 129.0 (d,  $J = 7.7$  Hz), 127.92, 127.87, 127.4, 126.3, 114.8, 114.6 (d,  $J = 20.9$  Hz), 58.7, 58.3, 57.8, 57.4, 32.4, 32.3, 21.6, 9.3, 9.2, 8.4, 8.3;  $^{19}\text{F}$  NMR (376 MHz,  $\text{CDCl}_3$ )  $\delta$  -117.5; IR (neat):  $\nu$  2918, 1714, 1511, 1338, 1161, 1023, 836, 664  $\text{cm}^{-1}$ ; HRMS (ESI - TOF) Calcd. for  $\text{C}_{29}\text{H}_{28}\text{NO}_2\text{SFNa}$   $[\text{M}+\text{Na}]^+$ : 496.1717, Found: 496.1716.



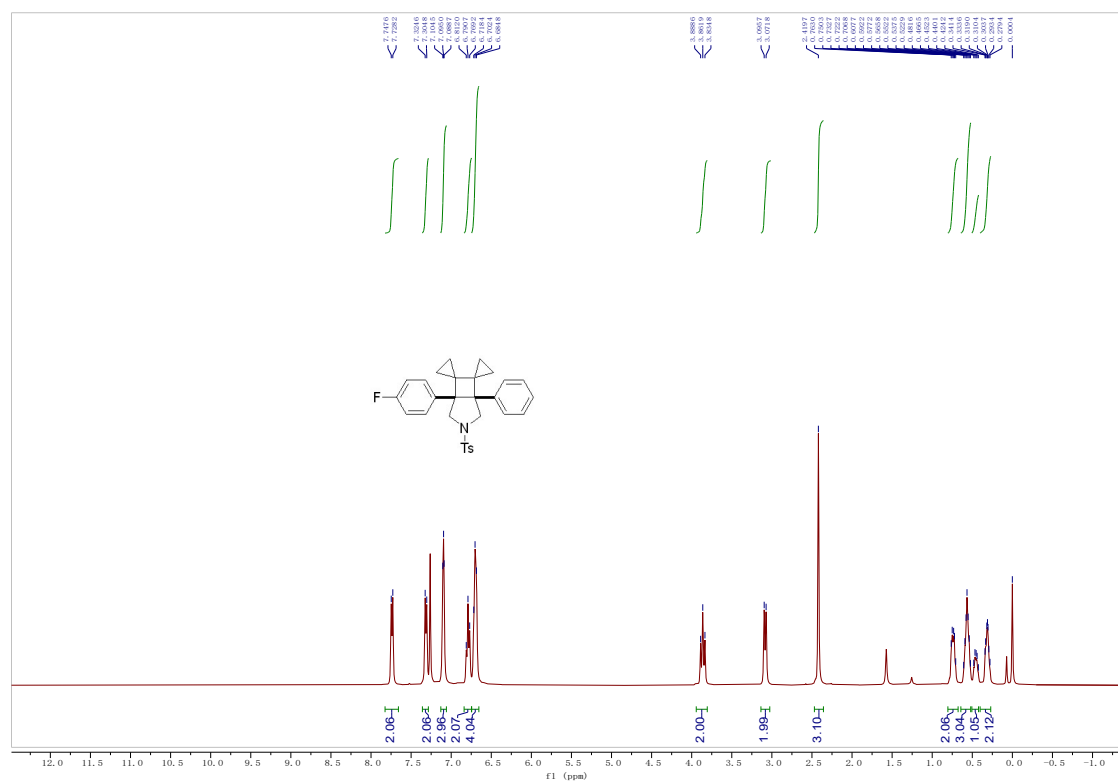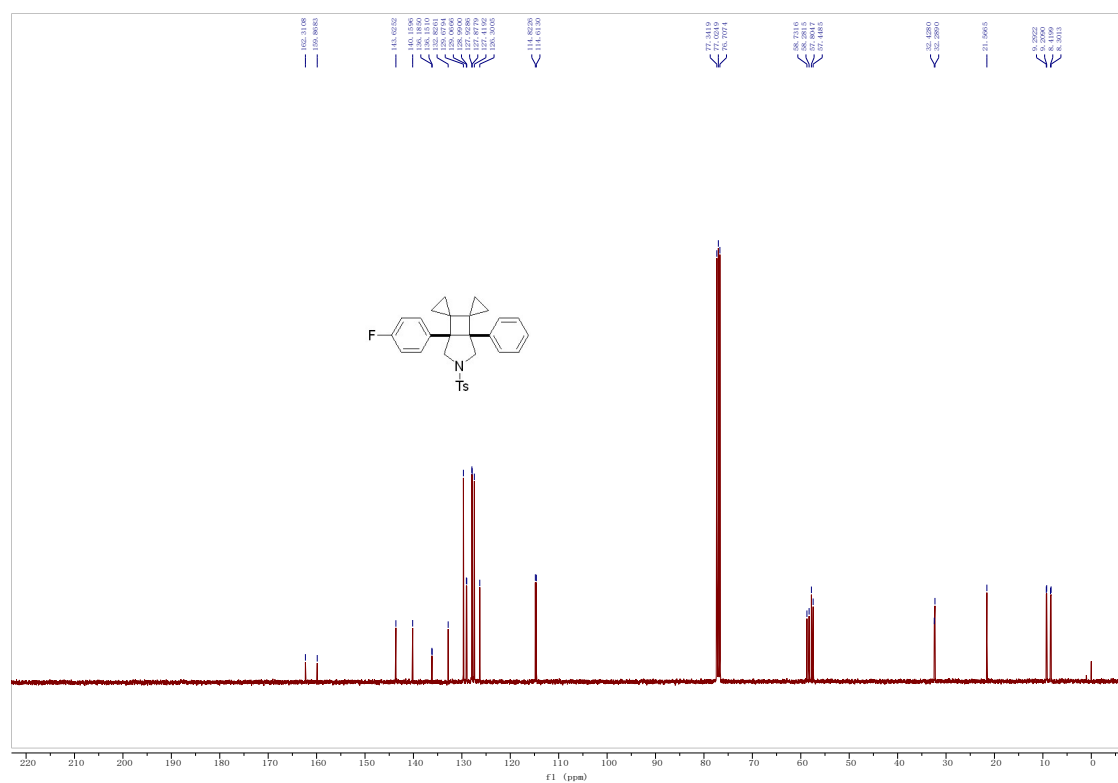

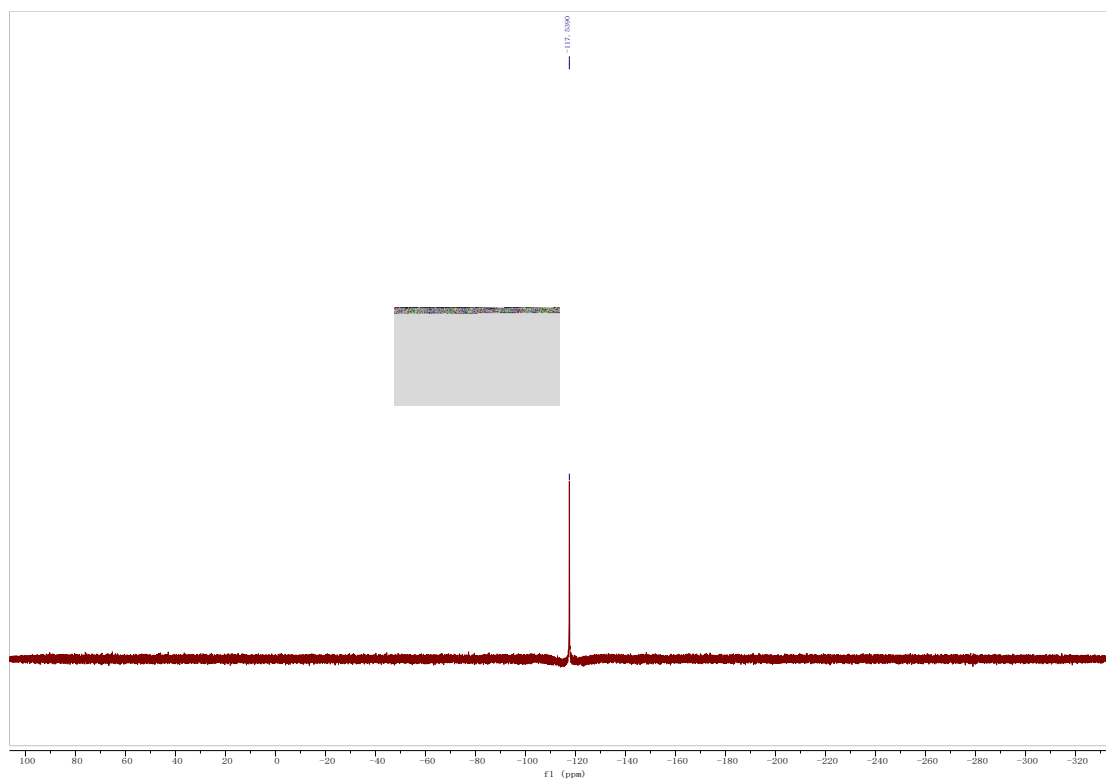

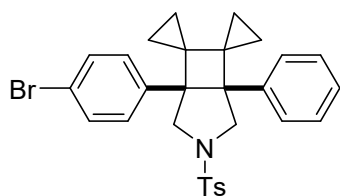

**Compound 2f:** Yield: 91.6 mg, 86%; A yellow solid; M.p.: 158 - 160 °C;  $^1\text{H}$  NMR (400 MHz,  $\text{CDCl}_3$ )  $\delta$  7.73 (d,  $J = 7.9$  Hz, 2H), 7.30 (d,  $J = 7.9$  Hz, 2H), 7.20 (d,  $J = 8.2$  Hz, 2H), 7.11 – 7.09 (m, 3H), 6.73 – 6.71 (m, 2H), 6.58 (d,  $J = 8.2$  Hz, 2H), 3.88 – 3.85 (m, 2H), 3.11 – 3.04 (m, 2H), 2.41 (s, 3H), 0.77 – 0.72 (m, 2H), 0.58 – 0.48 (m, 4H), 0.34 – 0.28 (m, 2H);  $^{13}\text{C}$  NMR (100 MHz,  $\text{CDCl}_3$ )  $\delta$  143.8, 140.1, 139.6, 132.8, 131.1, 129.8, 129.3, 128.1, 128.0, 127.5, 126.5, 120.3, 58.8, 58.5, 57.7, 57.6, 32.5, 32.4, 21.70, 21.68, 9.4, 9.3, 8.54, 8.51; IR (neat):  $\nu$  2969, 1847, 1160, 1121, 1043, 706, 684, 659  $\text{cm}^{-1}$ ; HRMS (ESI - TOF) Calcd. for  $\text{C}_{29}\text{H}_{29}\text{NO}_2\text{SBr}$   $[\text{M}+\text{H}]^+$ : 534.1097, Found: 534.1101.

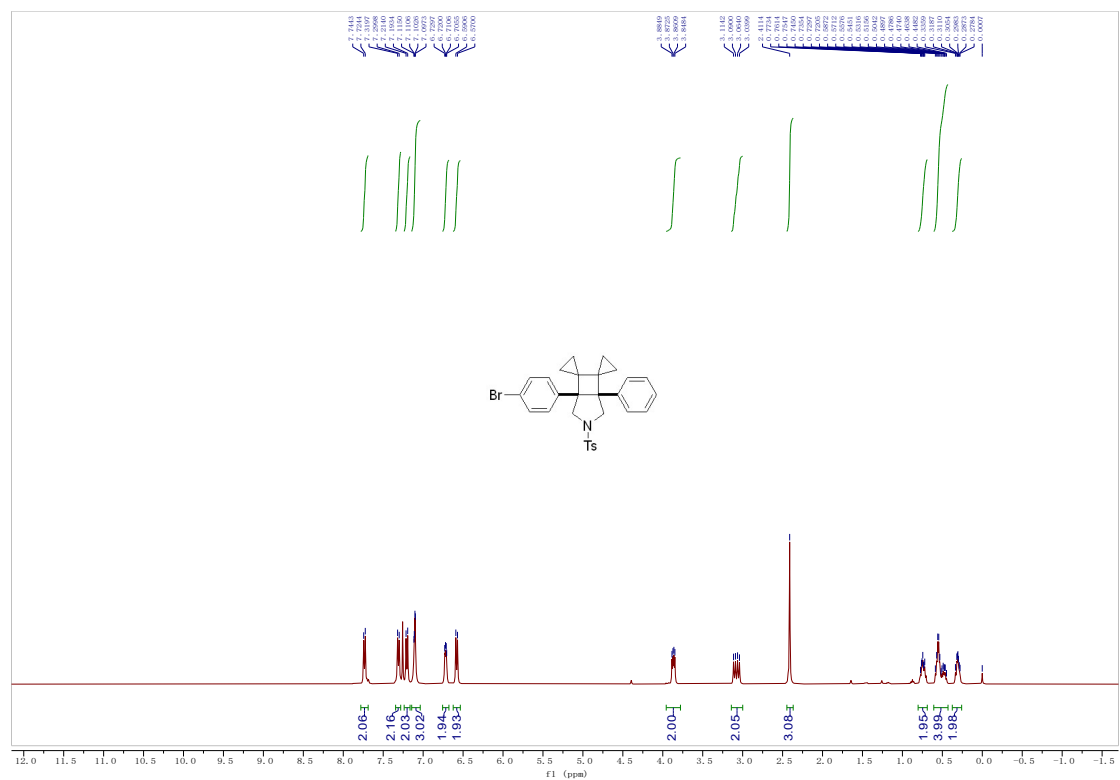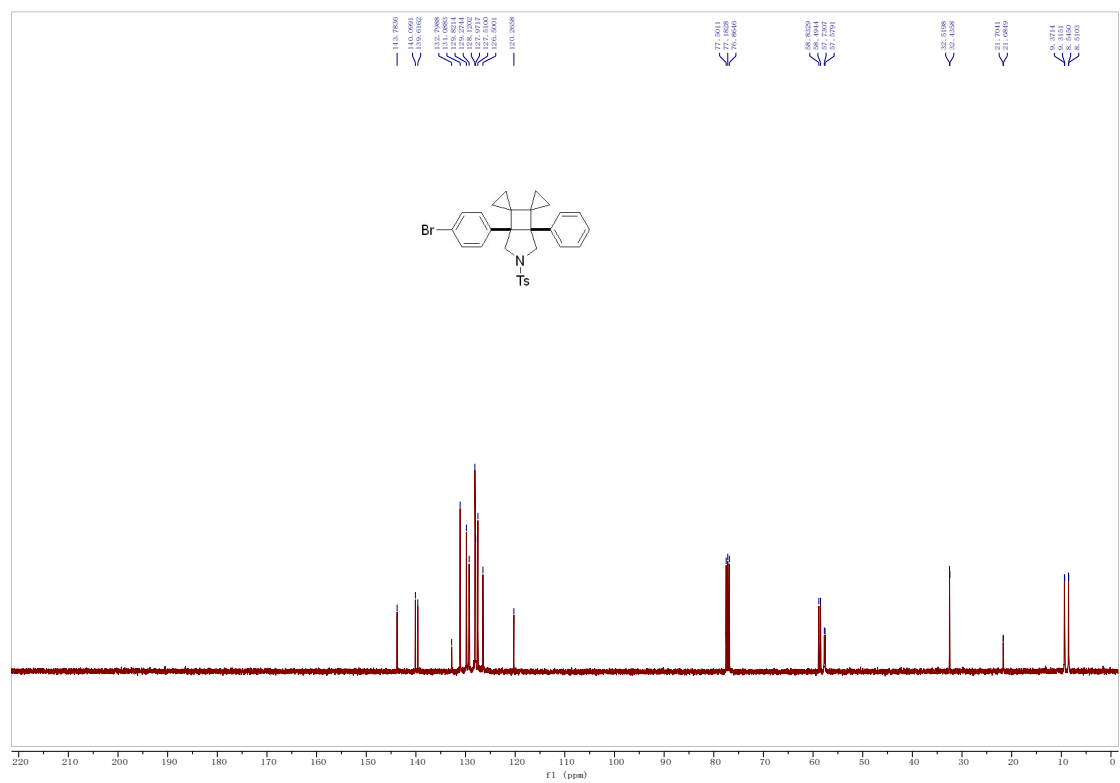

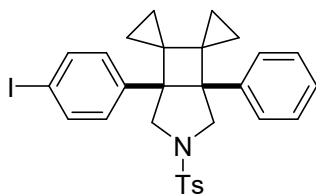

**Compound 2g:** Yield: 99.1 mg, 85%; A white solid; M.p.: 163 - 165 °C;  $^1\text{H}$  NMR (400 MHz,  $\text{CDCl}_3$ )  $\delta$  7.73 (d,  $J = 7.8$  Hz, 2H), 7.40 (d,  $J = 8.0$  Hz, 2H), 7.30 (d,  $J = 7.8$  Hz, 2H), 7.12 – 7.10 (m, 3H), 6.74 – 6.72 (m, 2H), 6.43 (d,  $J = 8.0$  Hz, 2H), 3.88 – 3.85 (m, 2H), 3.10 (m, 2H), 2.41 (s, 3H), 0.77 – 0.72 (m, 2H), 0.57 – 0.51 (m, 4H), 0.33 – 0.28 (m, 2H);  $^{13}\text{C}$  NMR (100 MHz,  $\text{CDCl}_3$ )  $\delta$  143.7, 140.2, 140.0, 137.0, 132.8, 129.7, 129.4, 128.0, 127.9, 127.4, 126.4, 91.7, 58.7, 58.5, 57.6, 57.5, 32.42, 32.36, 21.6, 9.3, 9.2, 8.5, 8.4; IR (neat):  $\nu$  2844, 1711, 1598, 1487, 1346, 1165, 1001, 816, 706, 663  $\text{cm}^{-1}$ ; HRMS (ESI - TOF) Calcd. for  $\text{C}_{29}\text{H}_{28}\text{NO}_2\text{SNaI}$   $[\text{M}+\text{Na}]^+$ : 604.0778, Found: 604.0779.

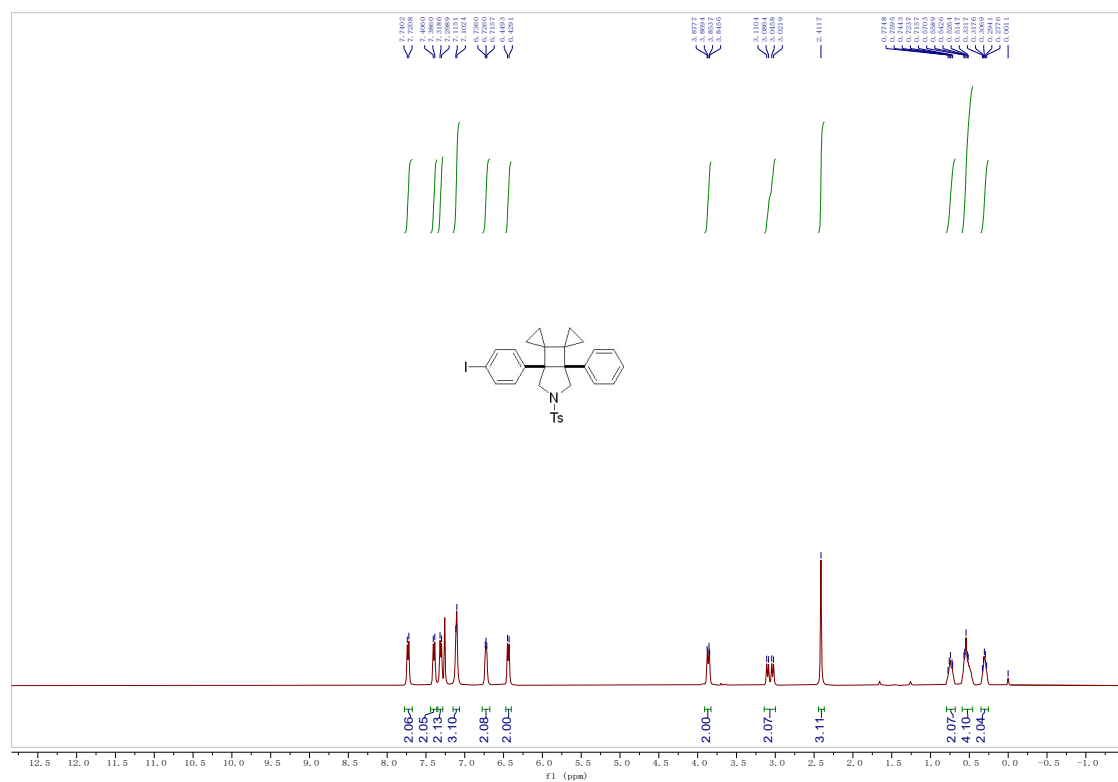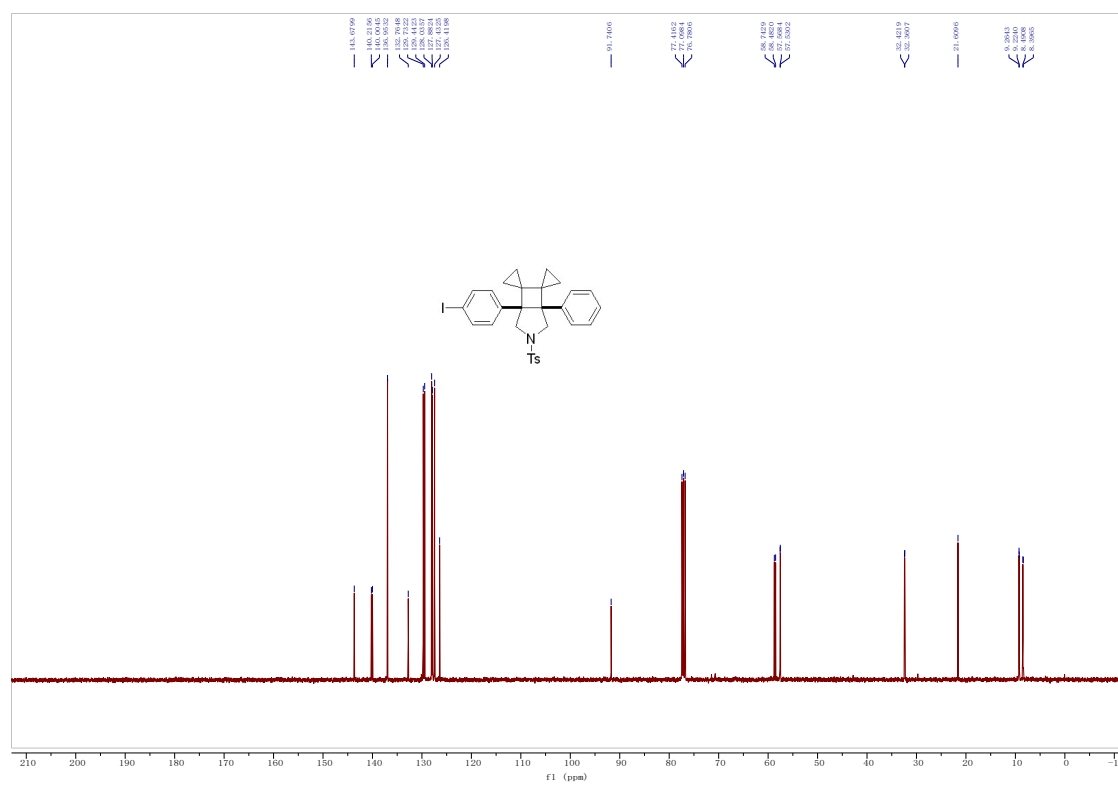

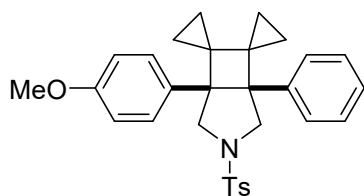

**Compound 2h:** Yield: 85.1 mg, 88%; A white solid; M.p.: 118 - 120 °C;  $^1\text{H}$  NMR (400 MHz,  $\text{CDCl}_3$ )  $\delta$  7.74 (d,  $J = 7.9$  Hz, 2H), 7.30 (d,  $J = 7.9$  Hz, 2H), 7.10 – 7.08 (m, 3H), 6.74 – 6.71 (m, 2H), 6.67 – 6.62 (m, 4H), 3.85 (m, 2H), 3.70 (s, 3H), 3.08 (dd,  $J = 9.4, 1.9$  Hz, 2H), 2.41 (s, 3H), 0.76 – 0.71 (m, 2H), 0.58 – 0.48 (m, 4H), 0.46 – 0.27 (m, 2H);  $^{13}\text{C}$  NMR (100 MHz,  $\text{CDCl}_3$ )  $\delta$  157.6, 143.5, 140.4, 132.7, 132.3, 129.6, 128.5, 127.82, 127.76, 127.4, 126.1, 58.5, 58.1, 57.7, 57.5, 55.0, 32.32, 32.25, 21.5, 9.2, 9.1, 8.3, 8.2; IR (neat):  $\nu$  2918, 1514, 1345, 1249, 1166, 1023, 816, 664  $\text{cm}^{-1}$ ; HRMS (ESI - TOF) Calcd. for  $\text{C}_{30}\text{H}_{32}\text{NO}_3\text{S}$   $[\text{M}+\text{H}]^+$ : 486.2097, Found: 486.2108.

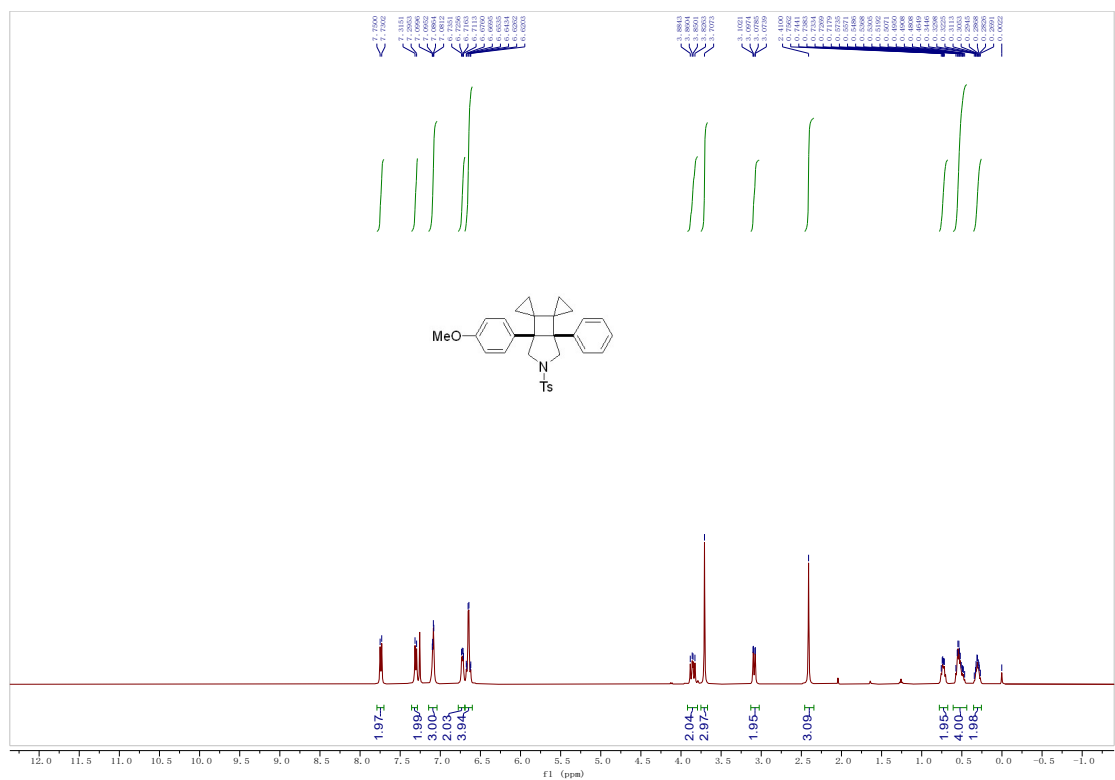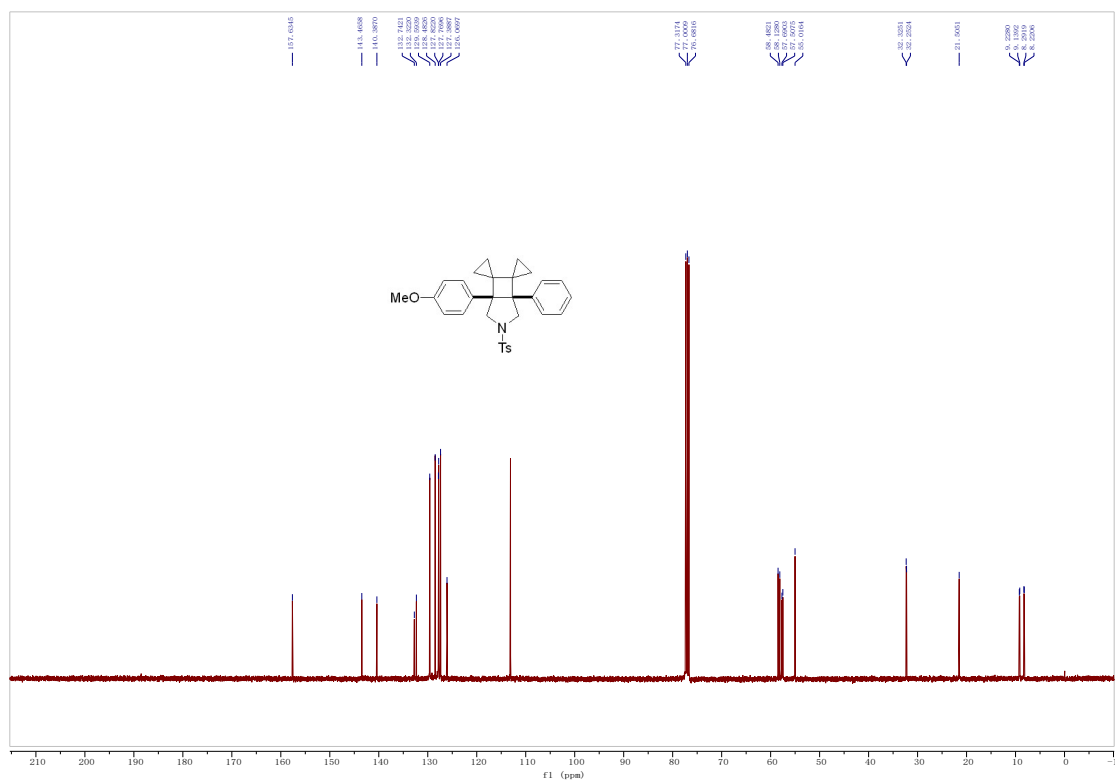



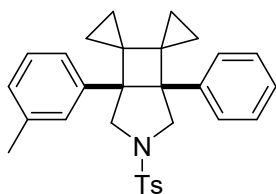

**Compound 2i:** Yield: 87.8 mg, 93%; A white solid; M.p.: 107 - 109°C;  $^1\text{H}$  NMR (400 MHz,  $\text{CDCl}_3$ )  $\delta$  7.78 – 7.72 (m, 2H), 7.30 (d,  $J$  = 8.1 Hz, 2H), 7.13 – 7.06 (m, 3H), 6.99 – 6.91 (m, 1H), 6.91 – 6.86 (m, 1H), 6.82 – 6.75 (m, 2H), 6.51 – 6.42 (m, 2H), 3.92 – 3.82 (m, 2H), 3.15 (d,  $J$  = 9.5 Hz, 1H), 3.09 (d,  $J$  = 9.5 Hz, 1H), 2.40 (s, 3H), 2.13 (s, 3H), 0.81 – 0.69 (m, 2H), 0.63 – 0.50 (m, 3H), 0.53 – 0.43 (m, 2H), 0.36 – 0.24 (m, 2H);  $^{13}\text{C}$  NMR (100 MHz,  $\text{CDCl}_3$ )  $\delta$  143.4, 140.3, 140.2, 137.2, 132.9, 129.6, 127.82, 127.78, 127.7, 127.6, 127.5, 126.7, 126.1, 124.7, 58.61, 58.56, 57.9, 57.1, 32.3, 32.3, 21.5, 21.4, 9.2, 9.1, 8.4, 8.1; IR (neat):  $\nu$  2932, 1607, 1488, 1455, 1337, 1298, 1176, 1117, 822, 777, 716  $\text{cm}^{-1}$ ; HRMS (ESI - TOF) Calcd. for  $\text{C}_{30}\text{H}_{32}\text{NO}_2\text{S}$   $[\text{M}+\text{H}]^+$ : 470.2148, Found: 470.2152.

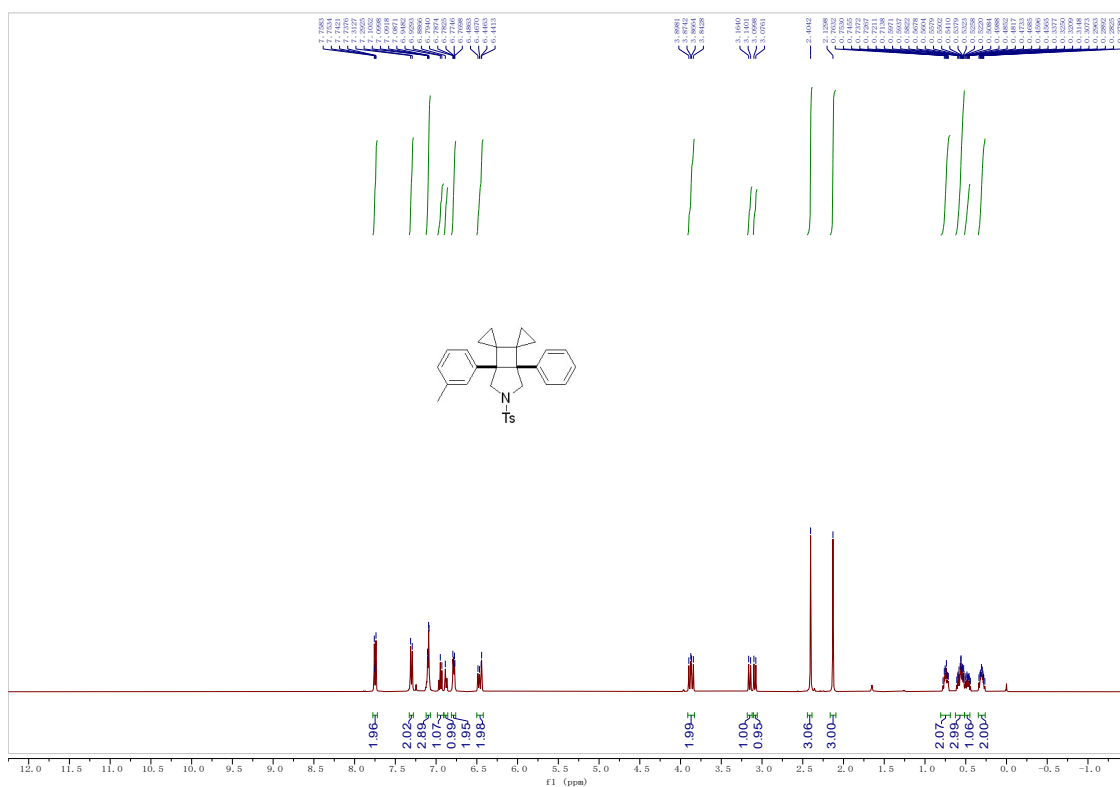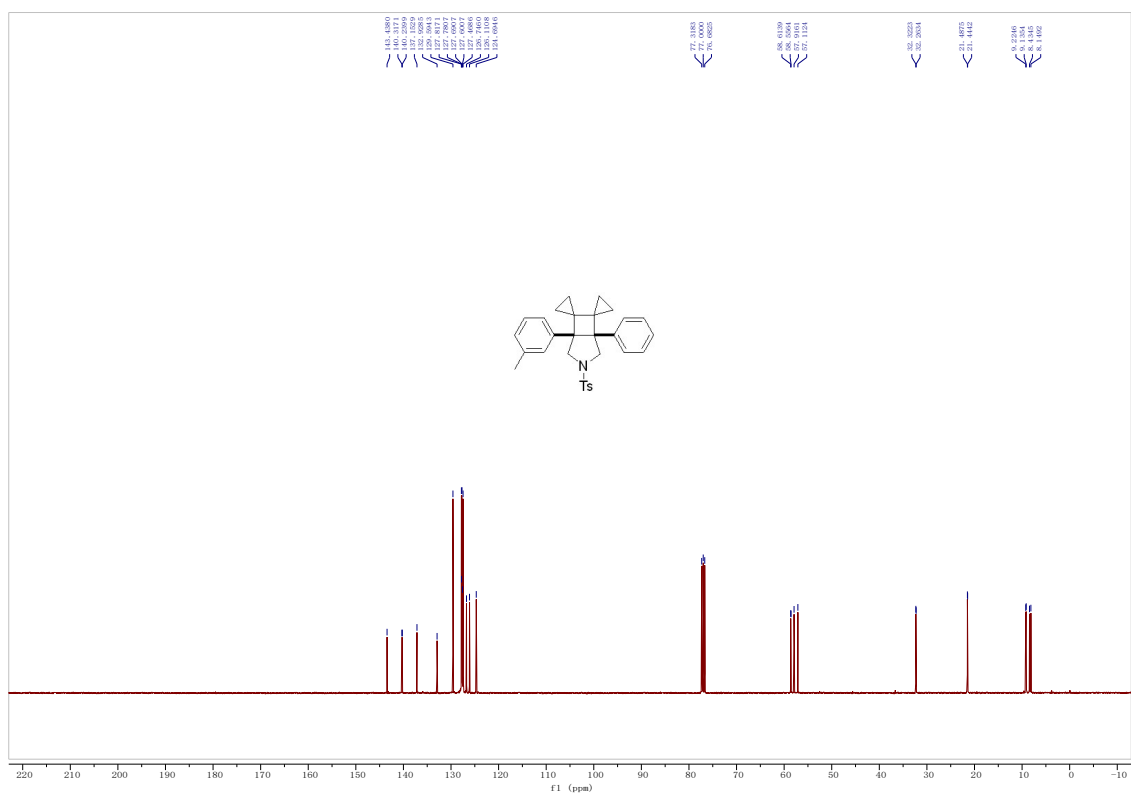

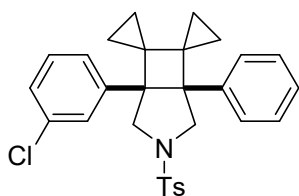

**Compound 2j:** Yield: 87.5 mg, 89%; A white solid; M.p.: 171 - 173 °C;  $^1\text{H}$  NMR (400 MHz,  $\text{CDCl}_3$ )  $\delta$  7.74 (d,  $J = 7.9$  Hz, 2H), 7.32 (d,  $J = 7.9$  Hz, 2H), 7.12 – 6.99 (m, 5H), 6.74 – 6.71 (m, 2H), 6.65 – 6.61 (m, 2H), 3.88 – 3.85 (m, 2H), 3.10 – 3.04 (m, 4H), 2.43 (s, 3H), 0.78 – 0.74 (m, 2H), 0.60 – 0.49 (m, 4H), 0.47 – 0.31 (m, 2H);  $^{13}\text{C}$  NMR (100 MHz,  $\text{CDCl}_3$ )  $\delta$  143.7, 142.5, 139.8, 133.6, 132.6, 129.8, 129.1, 128.0, 127.9, 127.4, 127.2, 126.44, 126.40, 126.1, 58.8, 58.5, 57.5, 57.3, 32.4, 32.3, 21.6, 9.33, 9.29, 8.5; IR (neat):  $\nu$  2846, 1712, 1596, 1344, 1163, 1025, 830, 707, 664  $\text{cm}^{-1}$ ; HRMS (ESI - TOF) Calcd. for  $\text{C}_{29}\text{H}_{29}\text{NO}_2\text{SCl}$   $[\text{M}+\text{H}]^+$ : 490.1602, Found: 490.1600.

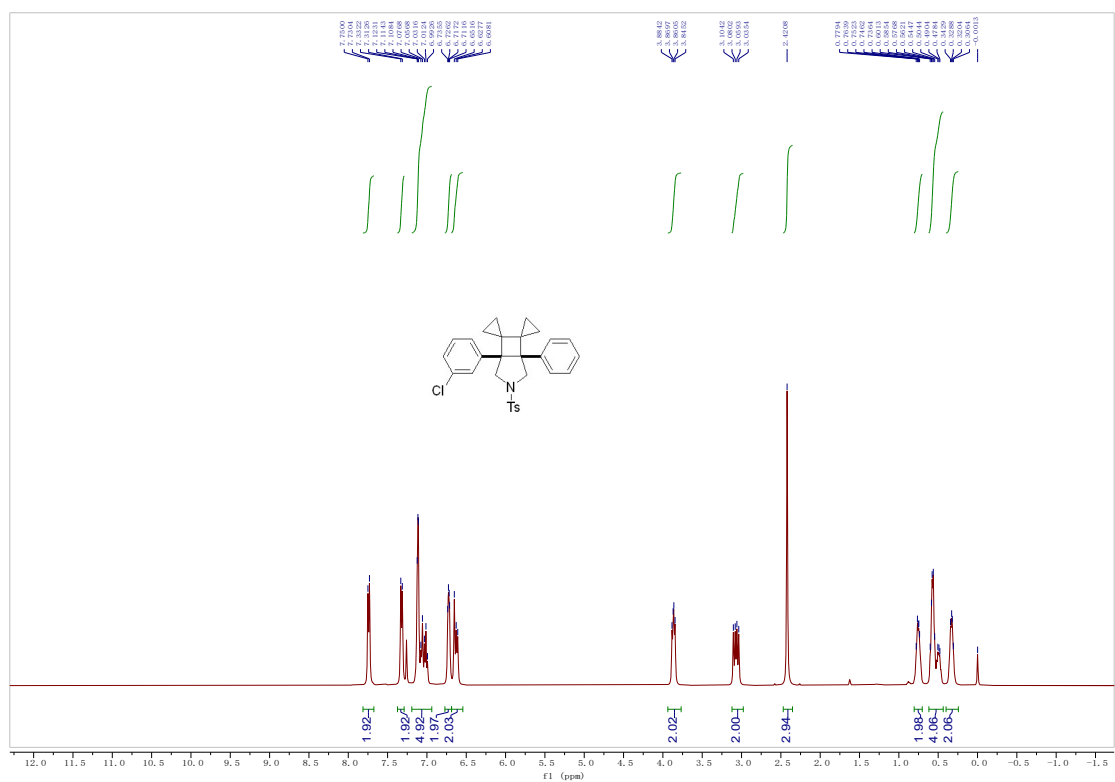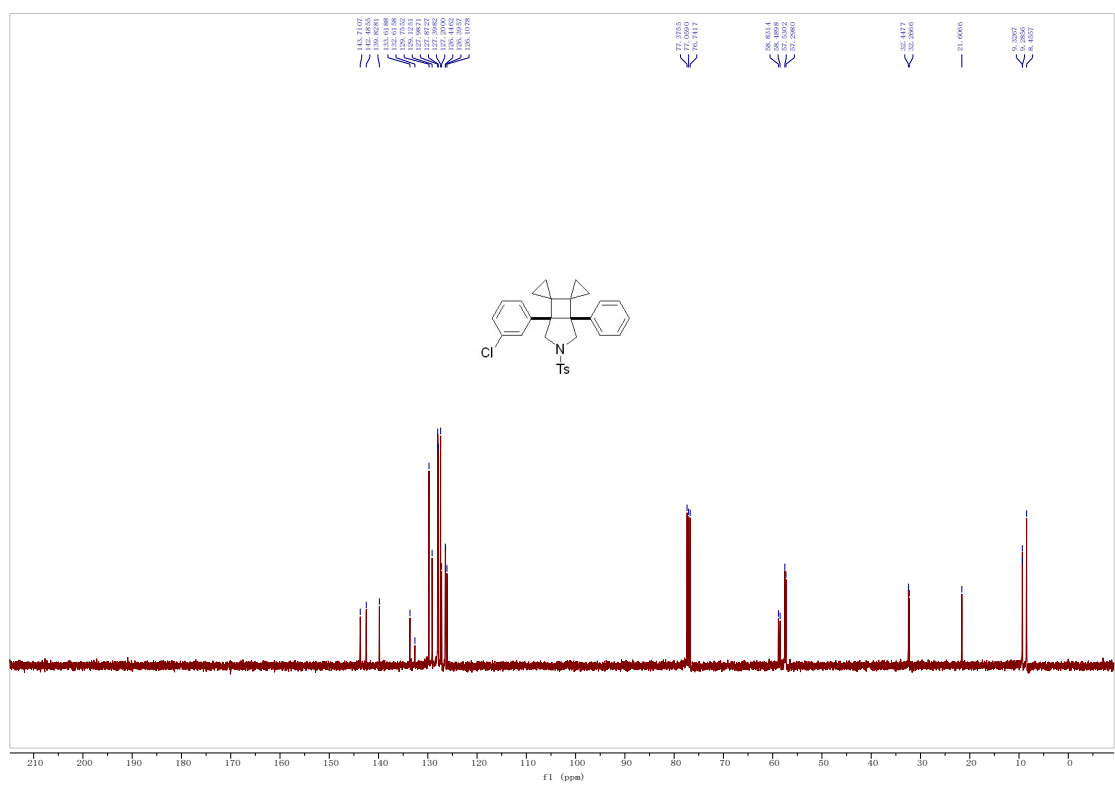

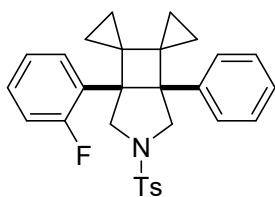

**Compound 2l:** Yield: 72.6 mg, 79%; A white solid; M.p.: 185 - 187 °C;  $^1\text{H}$  NMR (400 MHz,  $\text{CDCl}_3$ )  $\delta$  7.78 (d,  $J = 8.3$  Hz, 2H), 7.30 (d,  $J = 7.9$  Hz, 2H), 7.19 – 7.13 (m, 3H), 7.08 – 6.99 (m, 3H), 6.94 – 6.82 (m, 1H), 6.80 – 6.78 (m, 1H), 6.54 – 6.49 (m, 1H), 4.14 (dd,  $J = 9.7, 2.4$  Hz, 1H), 3.77 (d,  $J = 9.5$  Hz, 1H), 3.31 (d,  $J = 9.5$  Hz, 1H), 3.01 (d,  $J = 9.7$  Hz, 1H), 2.41 (s, 3H), 0.93 – 0.92 (m, 1H), 0.89 – 0.81 (m, 1H), 0.79 – 0.70 (m, 1H), 0.59 – 0.53 (m, 1H), 0.45 – 0.37 (m, 2H), 0.35 – 0.12 (m, 2H);  $^{13}\text{C}$  NMR (100 MHz,  $\text{CDCl}_3$ )  $\delta$  161.5, 159.1 (d,  $J = 244.7$  Hz), 143.6, 140.6, 133.0, 129.7, 129.13, 129.08 (d,  $J = 5.5$  Hz), 128.2, 128.12 (d,  $J = 8.4$  Hz), 128.11, 127.87, 127.85 (d,  $J = 2.1$  Hz), 127.3, 126.4, 123.4, 123.3 (d,  $J = 3.1$  Hz), 115.9, 115.6 (d,  $J = 23.0$  Hz), 59.3, 58.71, 58.67, 57.24, 57.20, 54.9, 32.8, 32.5, 21.6, 10.24, 10.21, 9.0, 8.8, 7.2, 7.1;  $^{19}\text{F}$  NMR (376 MHz,  $\text{CDCl}_3$ )  $\delta$  -109.7; IR (neat):  $\nu$  2999, 1489, 1447, 1165, 1102, 1024, 830, 760, 665  $\text{cm}^{-1}$ ; HRMS (ESI - TOF) Calcd. for  $\text{C}_{29}\text{H}_{28}\text{NO}_2\text{FNaS}$   $[\text{M}+\text{Na}]^+$ : 496.1717, Found: 496.1714.

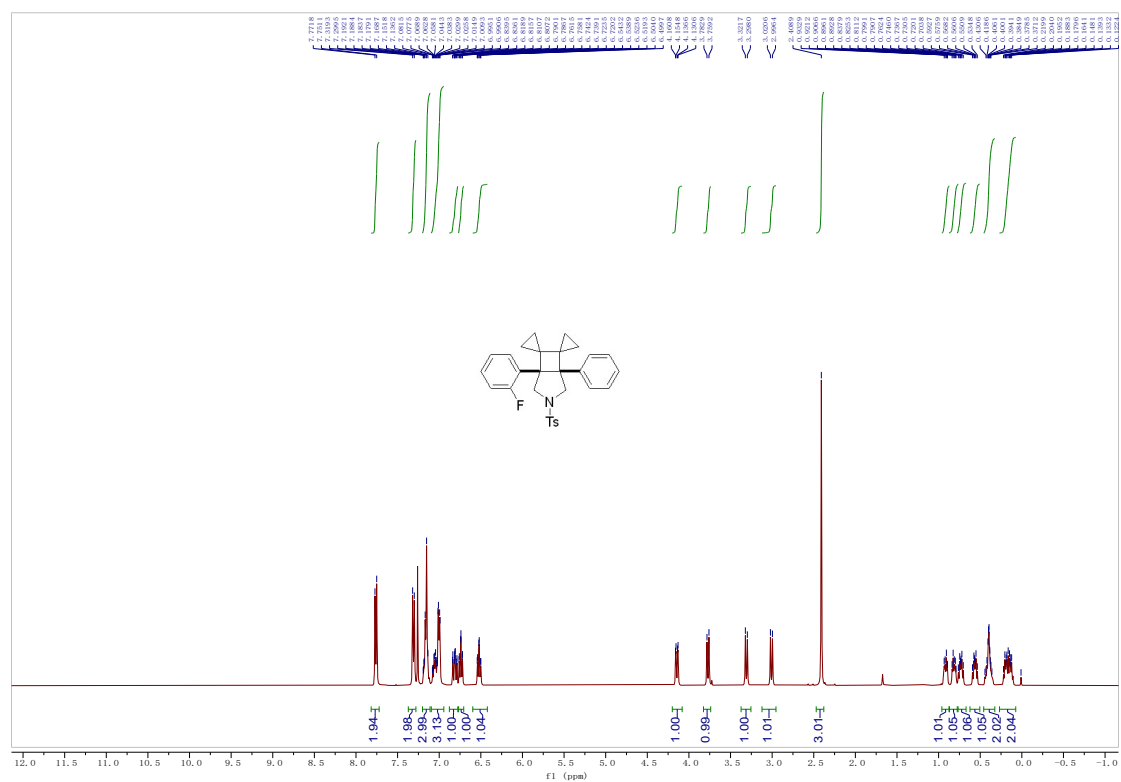

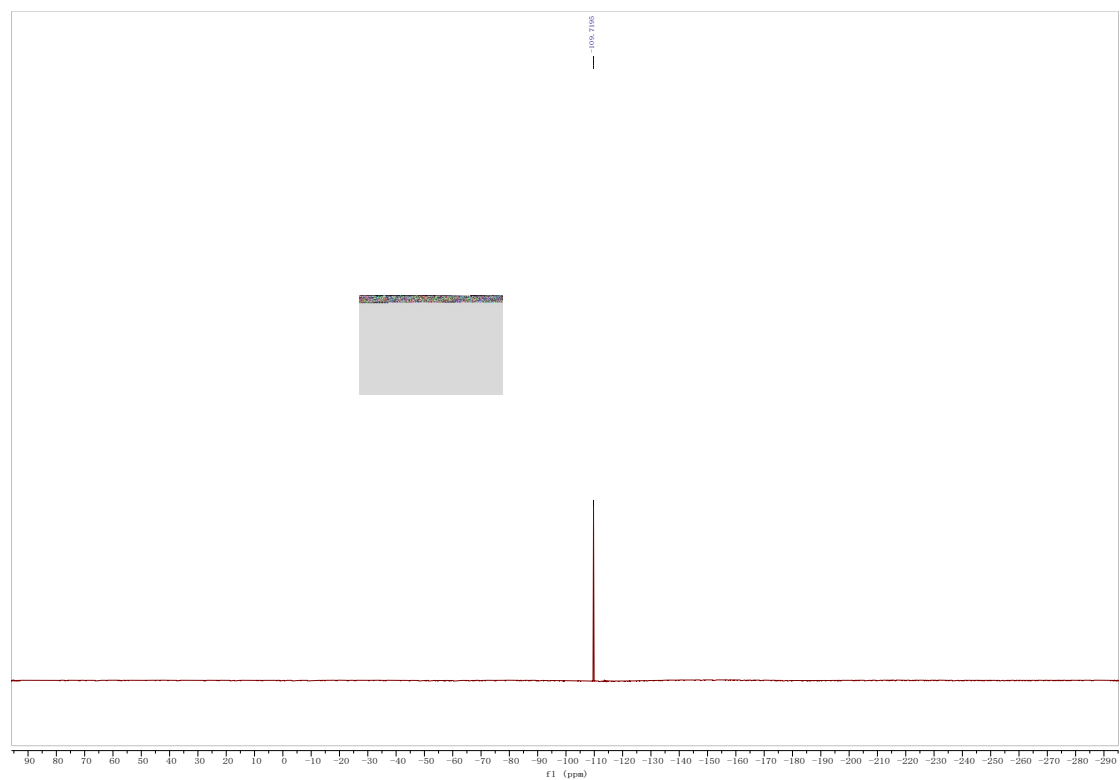

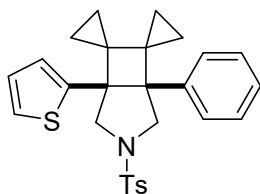

**Compound 2m:** Yield: 73.1 mg, 79%; A white solid; M.p.: 138 - 140 °C;  $^1\text{H}$  NMR (400 MHz,  $\text{CDCl}_3$ )  $\delta$  7.78 (d,  $J = 7.9$  Hz, 2H), 7.35 (d,  $J = 7.9$  Hz, 2H), 7.15 – 7.12 (m, 3H), 7.06 – 7.03 (m, 2H), 6.99 – 6.97 (m, 1H), 6.75 – 6.73 (m, 1H), 6.39 – 6.38 (m, 1H), 3.89 (d,  $J = 9.6$  Hz, 1H), 3.74 (d,  $J = 9.6$  Hz, 1H), 3.33 (d,  $J = 9.6$  Hz, 1H), 3.13 (d,  $J = 9.6$  Hz, 1H), 2.45 (s, 3H), 0.85 – 0.82 (m, 1H), 0.69 – 0.64 (m, 2H), 0.62 – 0.53 (m, 3H), 0.51 – 0.37 (m, 2H);  $^{13}\text{C}$  NMR (100 MHz,  $\text{CDCl}_3$ )  $\delta$  143.7, 142.8, 138.4, 132.6, 129.7, 128.0, 127.9, 127.6, 126.7, 126.2, 125.4, 123.8, 60.1, 58.8, 57.5, 55.0, 32.5, 31.2, 21.6, 10.0, 9.9, 8.6, 7.6; IR (neat):  $\nu$  2995, 1712, 1597, 1496, 1470, 1445, 1104, 1010, 815, 698  $\text{cm}^{-1}$ ; HRMS (ESI - TOF) Calcd. for  $\text{C}_{27}\text{H}_{27}\text{NO}_2\text{NaS}_2$   $[\text{M}+\text{Na}]^+$ : 484.1375, Found: 484.1370.



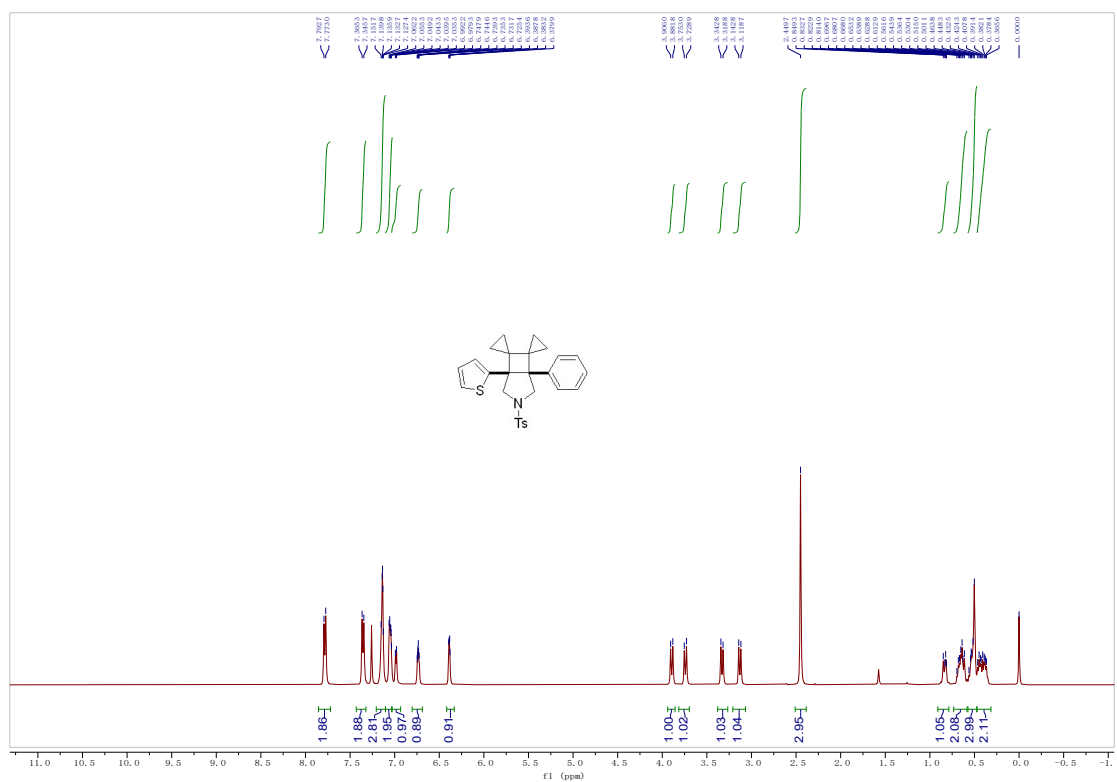

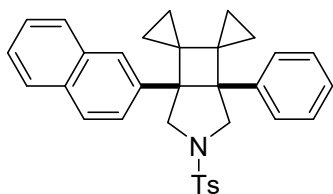

**Compound 2n:** Yield: 89.9 mg, 89%; A white solid; M.p.: 112 - 114 °C;  $^1\text{H}$  NMR (400 MHz,  $\text{CDCl}_3$ )  $\delta$  7.77 (d,  $J$  = 8.2 Hz, 2H), 7.76 – 7.75 (m, 1H), 7.69 – 7.62 (m, 1H), 7.51 (d,  $J$  = 8.2 Hz, 1H), 7.39 – 7.38 (m, 2H), 7.29 (d,  $J$  = 8.0 Hz, 2H), 7.09 – 7.06 (m, 1H), 7.06 – 7.05 (m, 3H), 7.05 – 7.04 (m, 1H), 6.74 – 6.71 (m, 2H), 3.99 – 3.94 (m, 2H), 3.25 (d,  $J$  = 9.6 Hz, 1H), 3.12 (d,  $J$  = 9.6 Hz, 1H), 2.39 (s, 3H), 0.84 – 0.76 (m, 2H), 0.76 – 0.64 (m, 1H), 0.62 – 0.56 (m, 2H), 0.48 – 0.25 (m, 3H);  $^{13}\text{C}$  NMR (100 MHz,  $\text{CDCl}_3$ )  $\delta$  143.6, 140.5, 138.1, 132.9, 132.8, 131.8, 129.7, 127.95, 127.89, 127.7, 127.5, 127.4, 127.3, 127.1, 126.2, 126.0, 125.8, 124.7, 58.9, 58.6, 58.3, 57.2, 32.5, 32.4, 21.6, 9.4, 9.2, 8.42, 8.39; IR (neat):  $\nu$  3065, 2840, 1598, 1347, 1167, 1107, 1023, 753, 703  $\text{cm}^{-1}$ ; HRMS (ESI - TOF) Calcd. for  $\text{C}_{33}\text{H}_{32}\text{NO}_2\text{S}$   $[\text{M}+\text{H}]^+$ : 506.2148, Found: 506.2153.

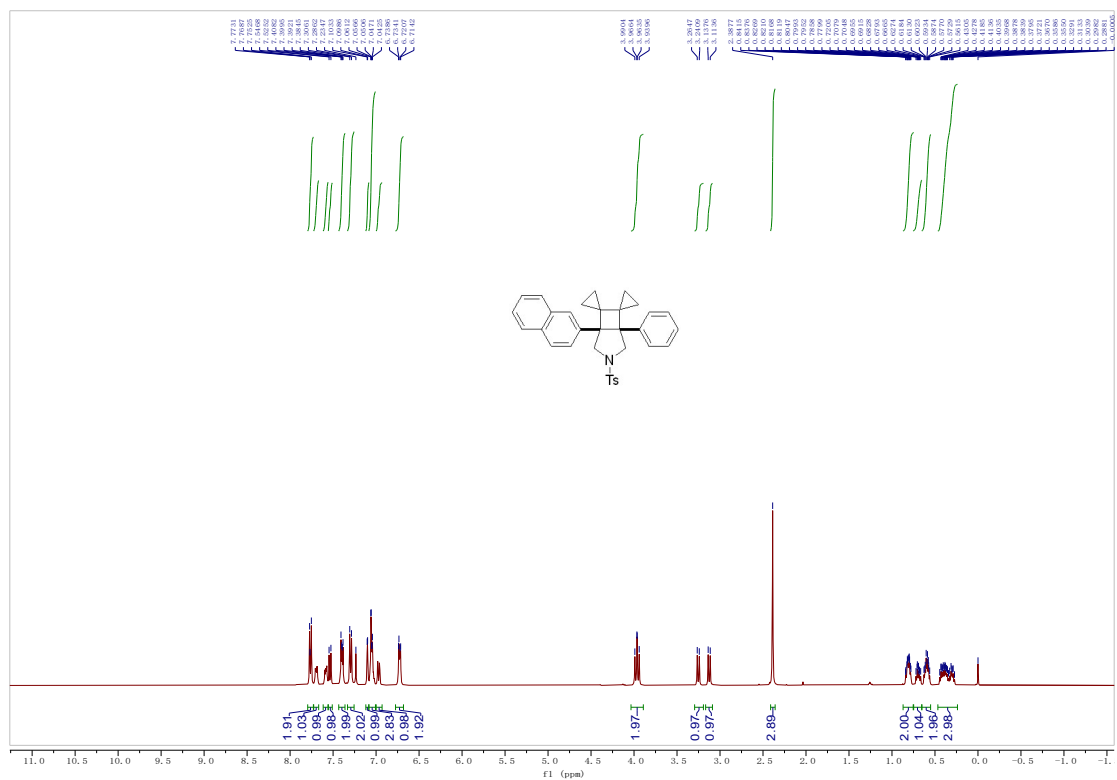

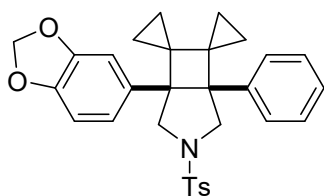

**Compound 2p:** Yield: 69.1 mg, 81%; A white solid; M.p.: 171 - 173°C;  $^1\text{H}$  NMR (400 MHz,  $\text{CDCl}_3$ )  $\delta$  7.73 (d,  $J = 7.8$  Hz, 2H), 7.30 (d,  $J = 7.8$  Hz, 2H), 7.11 – 7.10 (m, 3H), 6.73 – 6.71 (m, 2H), 6.56 (d,  $J = 8.1$  Hz, 1H), 6.27 (s, 1H), 6.19 (d,  $J = 8.1$  Hz, 1H), 5.84 (s, 2H), 3.83 (m, 2H), 3.07 – 3.03 (m, 2H), 2.41 (s, 3H), 0.76 – 0.71 (m, 2H), 0.61 – 0.48 (m, 4H), 0.34 – 0.27 (m, 2H);  $^{13}\text{C}$  NMR (100 MHz,  $\text{CDCl}_3$ )  $\delta$  147.2, 145.7, 143.6, 140.4, 134.3, 132.8, 129.7, 127.93, 127.89, 127.4, 126.3, 120.2, 108.6, 107.6, 100.8, 58.7, 58.6, 57.9, 57.5, 32.4, 32.3, 21.6, 9.31, 9.26, 8.5, 8.3; IR (neat):  $\nu$  2848, 1712, 1598, 1490, 1345, 1232, 1038, 1024, 935, 814, 701  $\text{cm}^{-1}$ ; HRMS (ESI - TOF) Calcd. for  $\text{C}_{30}\text{H}_{29}\text{NO}_4\text{SNa}$   $[\text{M}+\text{Na}]^+$ : 522.1709, Found: 522.1714.

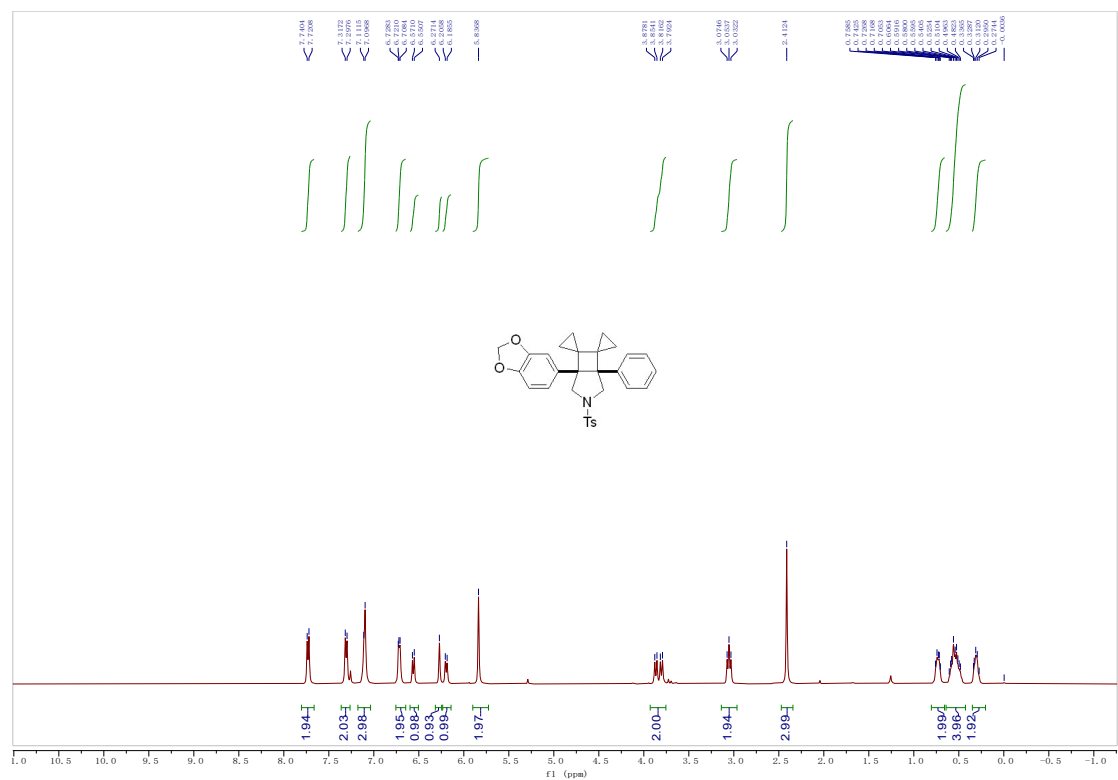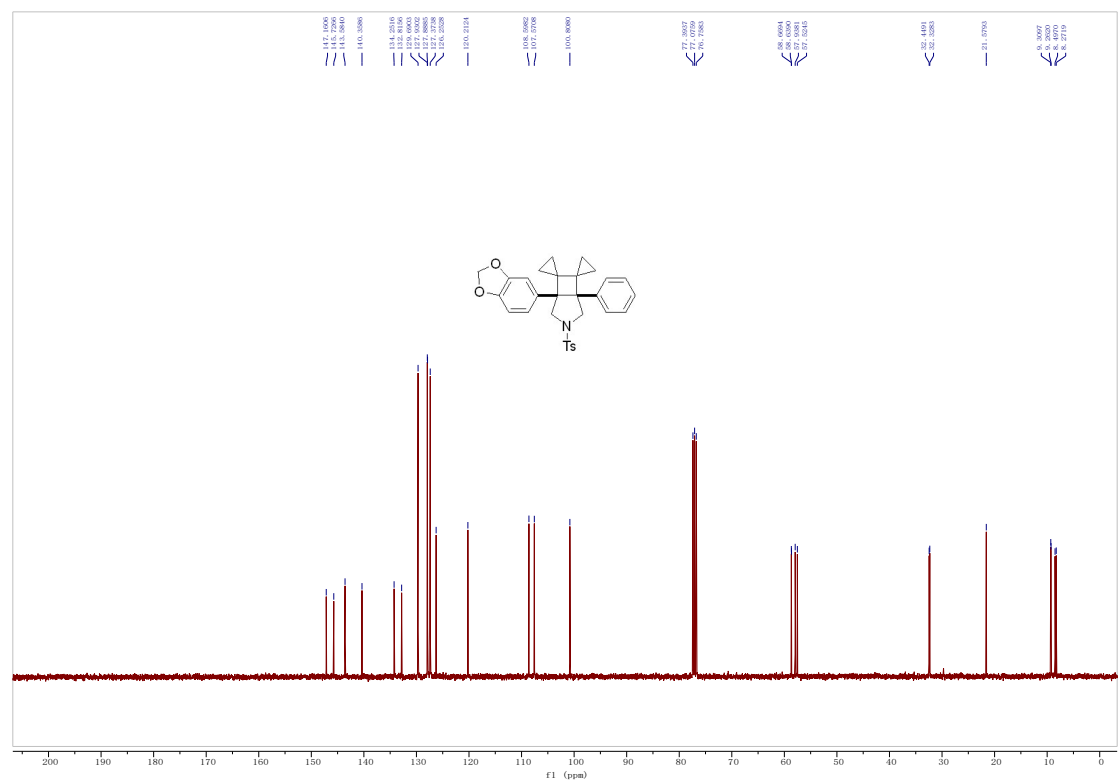

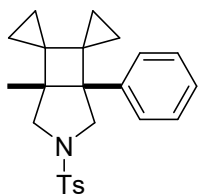

**Compound 2q:** Yield: 58.1 mg, 74%; A white solid; M.p.: 161 - 163 °C;  $^1\text{H}$  NMR (400 MHz,  $\text{CDCl}_3$ )  $\delta$  7.80 (d,  $J = 8.2$  Hz, 2H), 7.37 (d,  $J = 8.2$  Hz, 2H), 7.31 – 7.29 (m, 4H), 7.25 – 7.21 (m, 1H), 3.57 (d,  $J = 9.3$  Hz, 1H), 3.50 (d,  $J = 9.5$  Hz, 1H), 3.24 (d,  $J = 9.5$  Hz, 1H), 2.46 (d,  $J = 9.3$  Hz, 1H), 2.45 (s, 3H), 0.66 – 0.59 (m, 2H), 0.57 (s, 3H), 0.51 – 0.42 (m, 1H), 0.42 – 0.35 (m, 2H), 0.32 – 0.24 (m, 2H), 0.10 – 0.0 (m, 1H);  $^{13}\text{C}$  NMR (100 MHz,  $\text{CDCl}_3$ )  $\delta$  143.6, 138.6, 132.7, 129.6, 128.1, 128.0, 127.8, 126.5, 58.5, 56.8, 52.6, 50.9, 31.5, 31.0, 21.6, 17.5, 9.7, 9.2, 8.2, 6.0; IR (neat):  $\nu$  2920, 2359, 1347, 1167, 1091, 1024, 815, 706  $\text{cm}^{-1}$ ; HRMS (ESI - TOF) Calcd. for  $\text{C}_{24}\text{H}_{27}\text{NO}_2\text{SNa}$   $[\text{M}+\text{Na}]^+$ : 416.1655, Found: 416.1656.

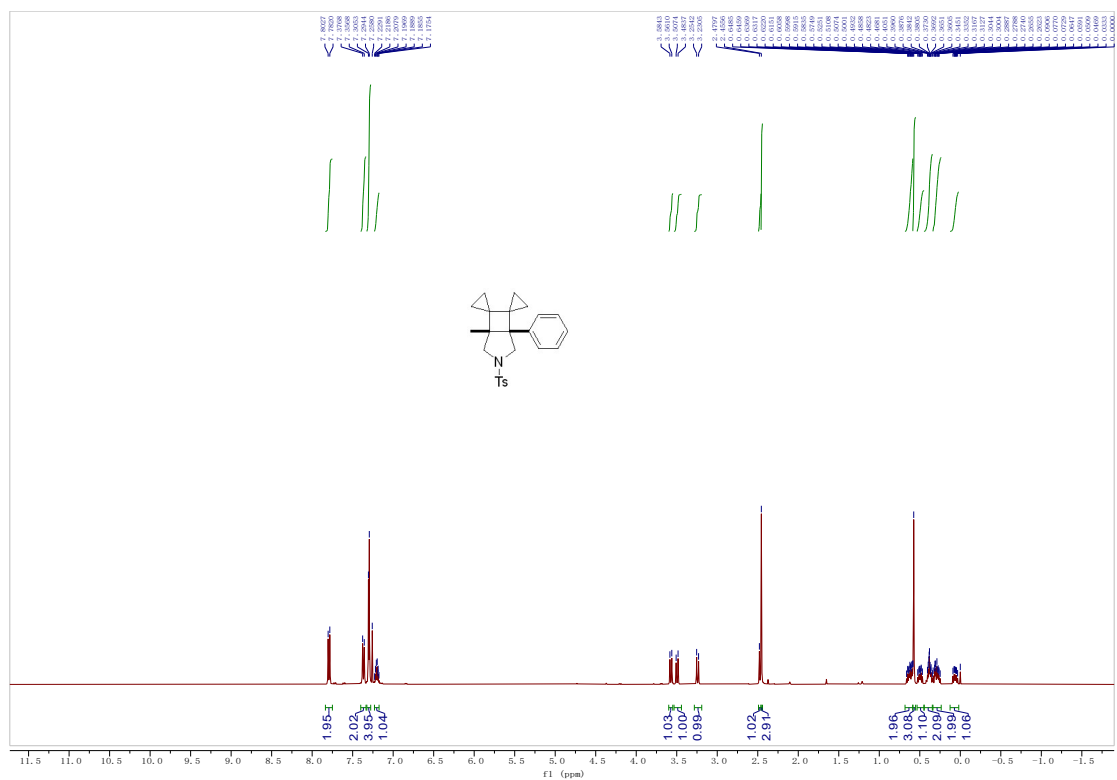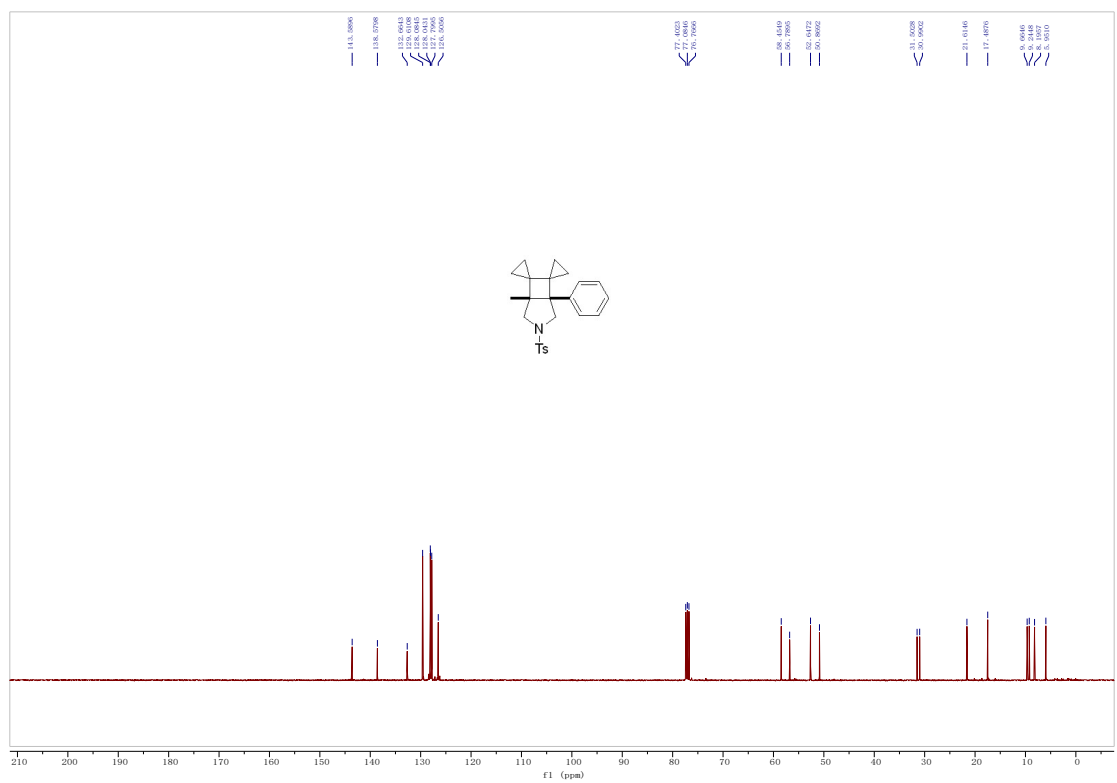

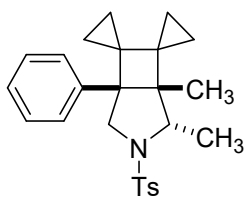

**Compound 2r:** Yield: 57.9 mg, 71%; A white solid; M.p.: 142 - 144 °C;  $^1\text{H}$  NMR (400 MHz,  $\text{CDCl}_3$ )  $\delta$  7.77 (d,  $J$  = 8.1 Hz, 2H), 7.36 – 7.26 (m, 6H), 7.20 – 7.16 (m, 1H), 3.52 (d,  $J$  = 9.8 Hz, 1H), 3.25 (d,  $J$  = 9.8 Hz, 1H), 2.64 (q,  $J$  = 6.6 Hz, 1H), 2.44 (s, 3H), 1.46 (d,  $J$  = 6.6 Hz, 3H), 0.85 – 0.78 (m, 2H), 0.76 – 0.61 (m, 1H), 0.49 (s, 3H), 0.48 – 0.44 (m, 1H), 0.30 – 0.18 (m, 3H), 0.17 – 0.03 (m, 1H);  $^{13}\text{C}$  NMR (100 MHz,  $\text{CDCl}_3$ )  $\delta$  143.6, 139.0, 132.8, 129.7, 128.04, 127.95, 127.91, 126.5, 66.1, 54.8, 54.2, 53.9, 30.9, 28.7, 21.6, 18.7, 16.3, 10.2, 7.7, 6.7, 5.6; IR (neat):  $\nu$  2988, 2359, 1351, 1207, 1106, 1090, 761, 661  $\text{cm}^{-1}$ ; HRMS (ESI - TOF) Calcd. for  $\text{C}_{25}\text{H}_{29}\text{NO}_2\text{SNa}$   $[\text{M}+\text{Na}]^+$ : 430.1811, Found: 430.1816.



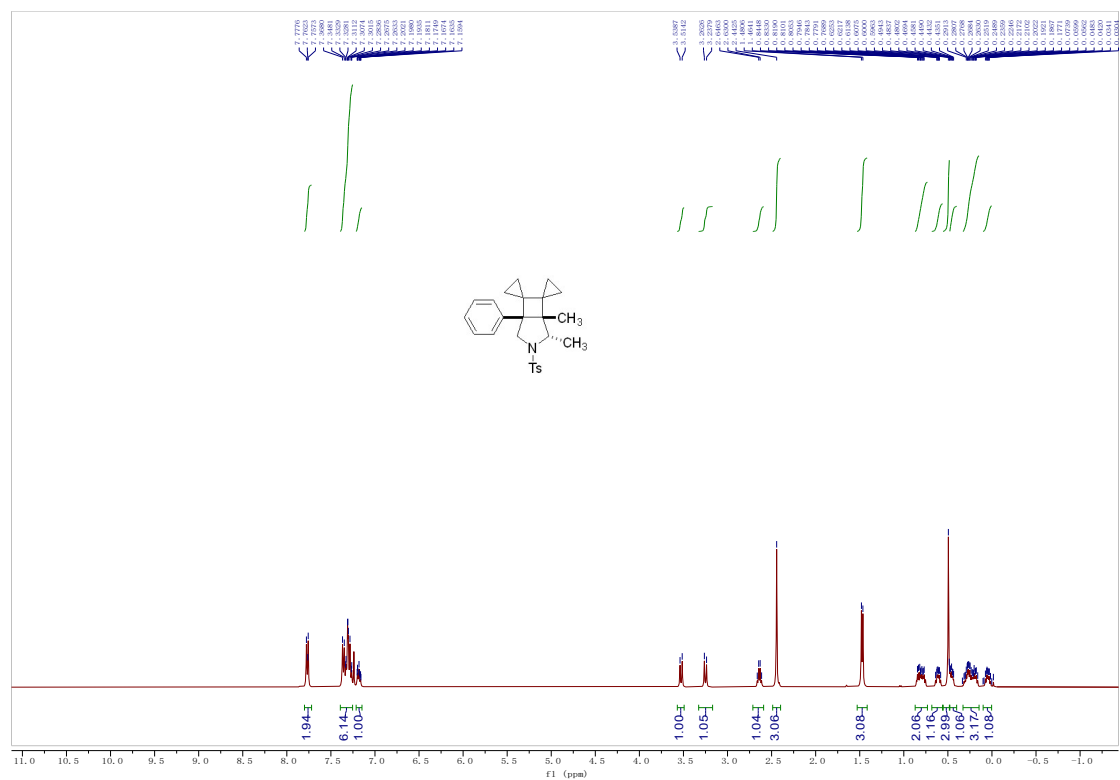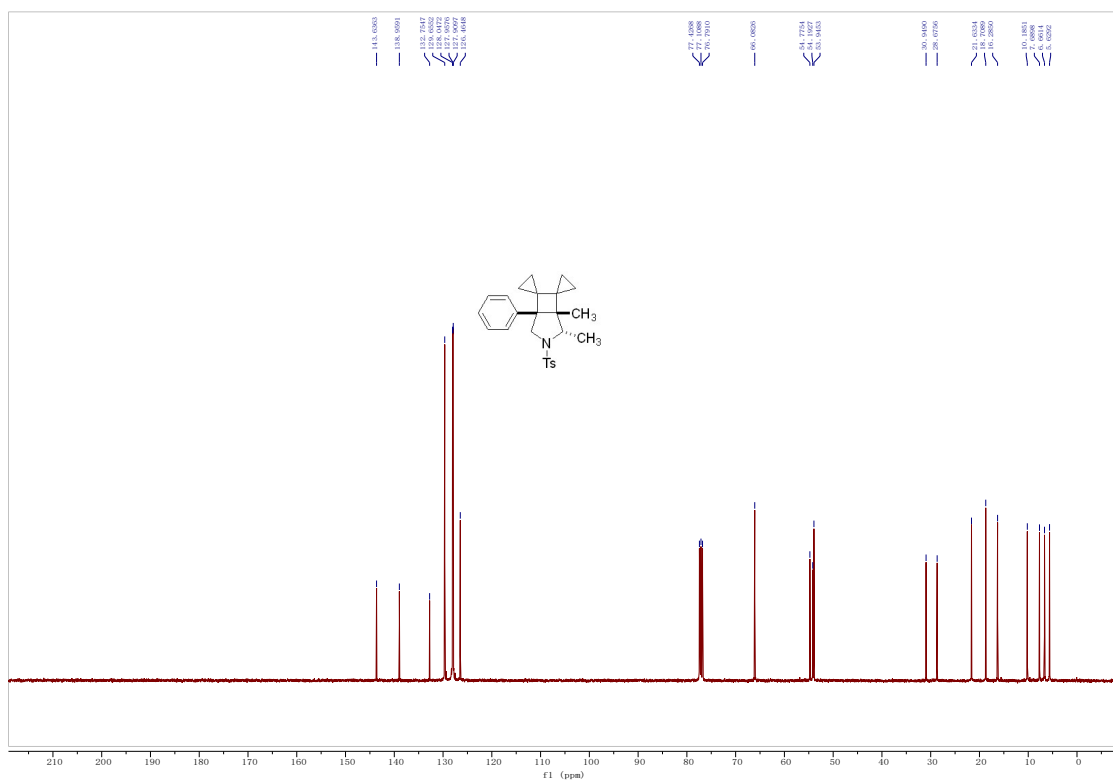

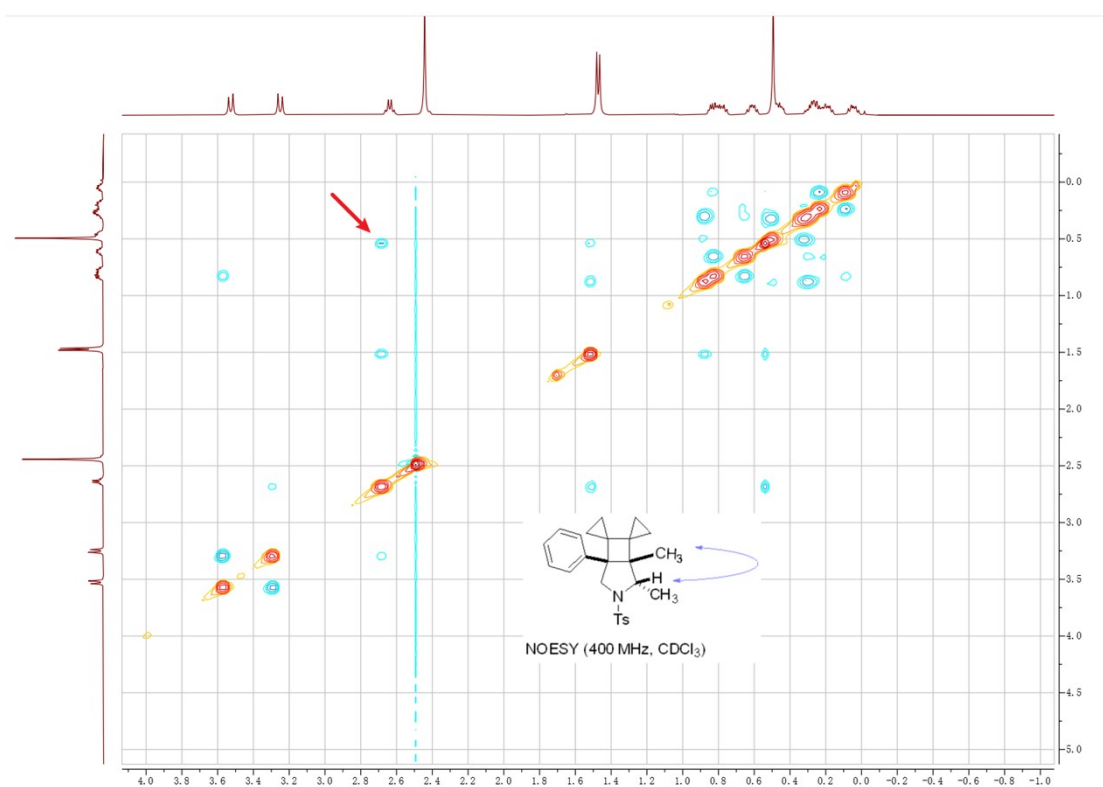

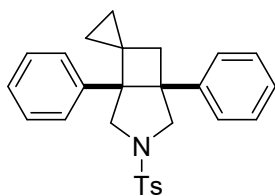

**Compound 2t:** Yield: 78.8 mg, 91%; A white solid; M.p.: 150 - 152 °C;  $^1\text{H}$  NMR (400 MHz,  $\text{CDCl}_3$ )  $\delta$  7.77 (d,  $J = 7.8$  Hz, 2H), 7.35 (d,  $J = 7.8$  Hz, 2H), 7.07 – 7.04 (m, 6H), 6.79 – 6.77 (m, 2H), 6.69 – 6.67 (m, 2H), 3.85 (d,  $J = 9.7$  Hz, 1H), 3.78 (d,  $J = 9.4$  Hz, 1H), 3.30 (d,  $J = 9.4$  Hz, 1H), 3.13 (d,  $J = 12.0$  Hz, 1H), 2.80 (d,  $J = 9.7$  Hz, 1H), 2.53 (d,  $J = 12.0$  Hz, 1H), 2.45 (s, 3H), 0.81 – 0.77 (m, 2H), 0.48 – 0.43 (m, 1H), 0.05 – 0.00 (m, 1H);  $^{13}\text{C}$  NMR (100 MHz,  $\text{CDCl}_3$ )  $\delta$  143.7, 141.7, 139.2, 132.1, 129.6, 128.0, 127.9, 127.7, 127.6, 127.3, 127.07, 127.05, 64.4, 60.6, 54.6, 54.3, 39.5, 25.3, 21.5, 13.9, 12.0; IR (neat):  $\nu$  3047, 1712, 1347, 1166, 1013, 816, 701, 663  $\text{cm}^{-1}$ ; HRMS (ESI - TOF) Calcd. for  $\text{C}_{27}\text{H}_{27}\text{NO}_2\text{SNa}$   $[\text{M}+\text{Na}]^+$ : 452.1655, Found: 452.1650.

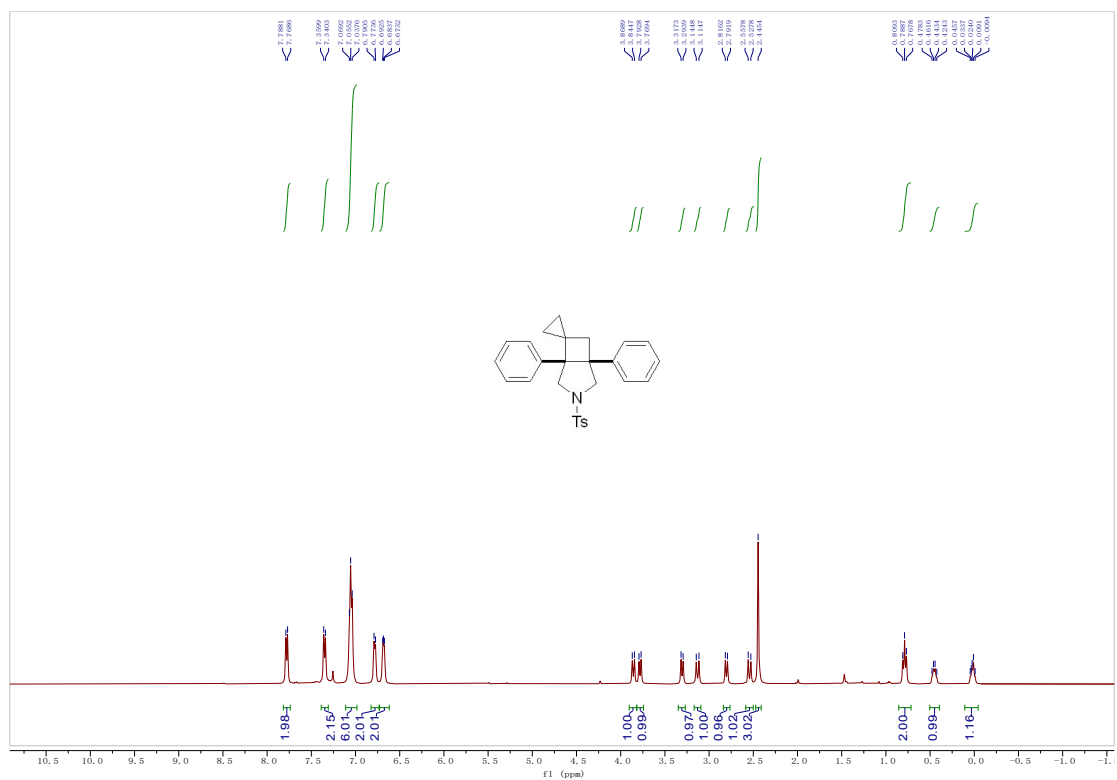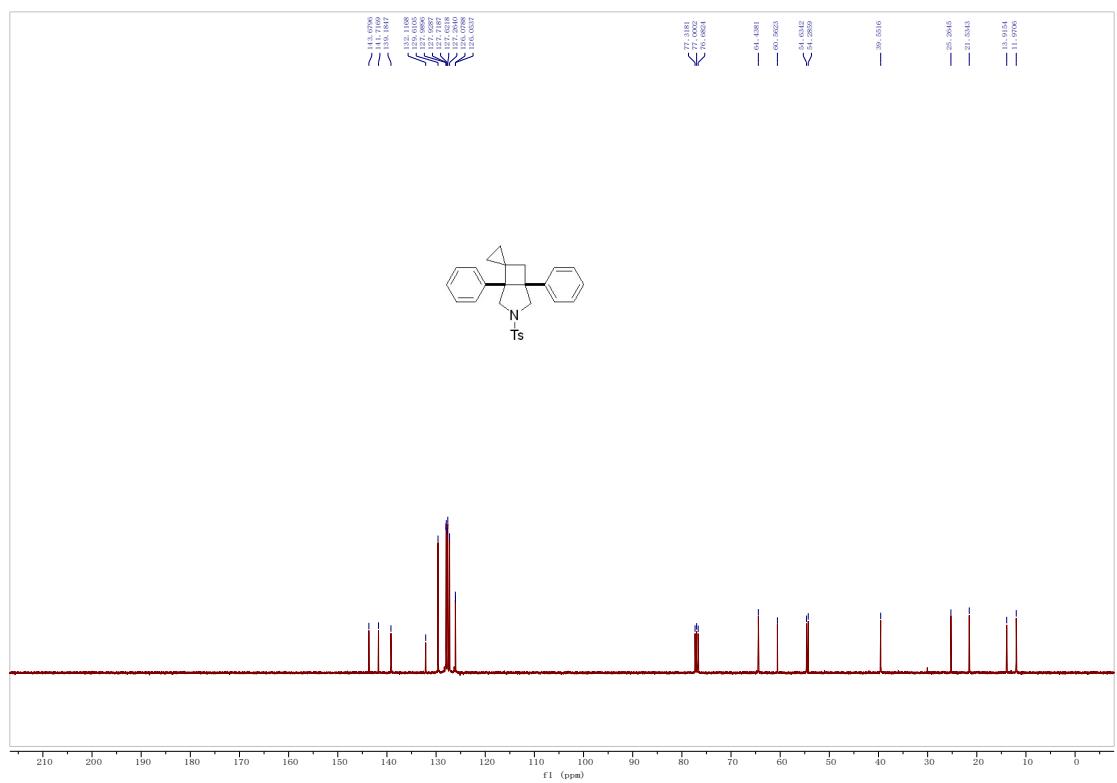

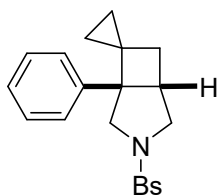

**Compound 2u:** Yield: 67.7 mg, 81%; A white solid; M.p.: 142 - 144 °C;  $^1\text{H}$  NMR (400 MHz,  $\text{CDCl}_3$ )  $\delta$  7.70 – 7.62 (m, 4H), 7.29 – 7.25 (m, 2H), 7.20 – 7.18 (m, 1H), 6.98 – 6.95 (m, 2H), 3.79 (d,  $J$  = 9.4 Hz, 1H), 3.59 (d,  $J$  = 9.4 Hz, 1H), 3.23 – 3.18 (m, 1H), 2.79 – 2.72 (m, 2H), 2.47 – 2.41 (m, 1H), 2.05 (dd,  $J$  = 12.1, 4.5 Hz, 1H), 0.63 – 0.56 (m, 2H), 0.27 – 0.22 (m, 1H), 0.03 – 0.00 (m, 1H);  $^{13}\text{C}$  NMR (100 MHz,  $\text{CDCl}_3$ )  $\delta$  142.1, 134.1, 132.3, 129.4, 128.5, 127.9, 126.5, 125.7, 56.5, 55.8, 54.4, 39.1, 33.0, 26.7, 13.2, 10.8; IR (neat):  $\nu$  2922, 1969, 1350, 1168, 1021, 1007, 818, 737, 701  $\text{cm}^{-1}$ ; HRMS (ESI - TOF) Calcd. for  $\text{C}_{20}\text{H}_{20}\text{NO}_2\text{SBrNa}$   $[\text{M}+\text{Na}]^+$ : 440.0290, Found: 440.0294.

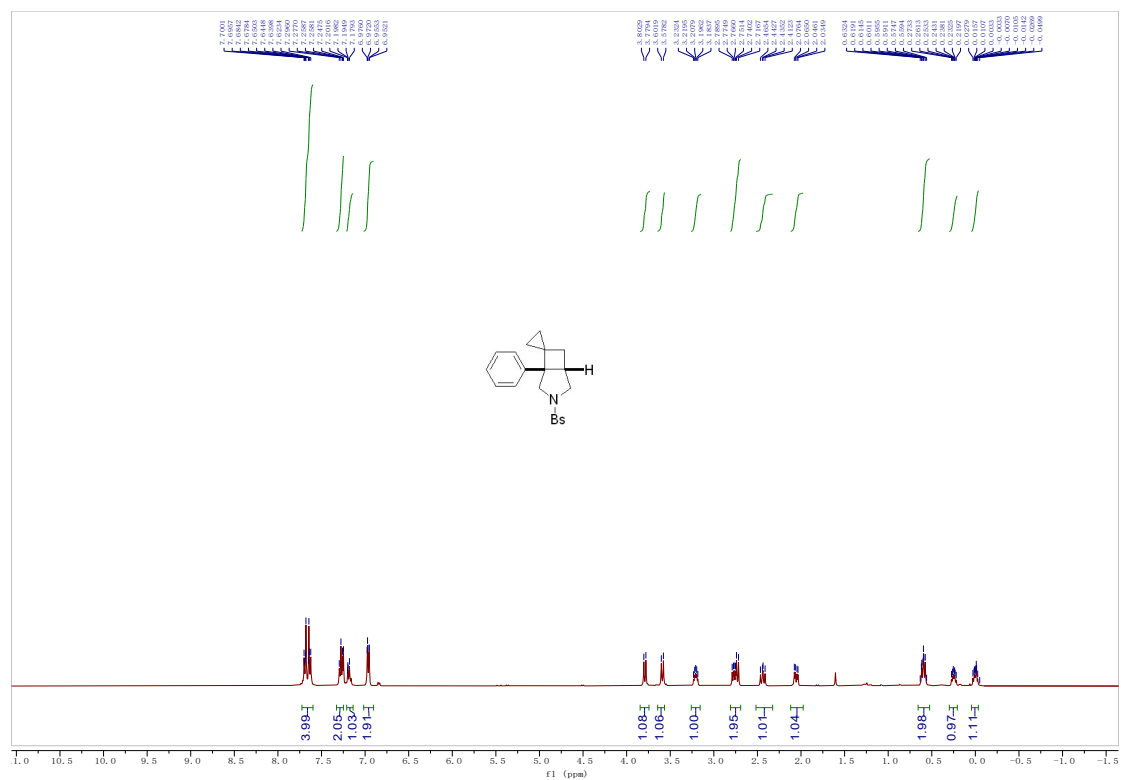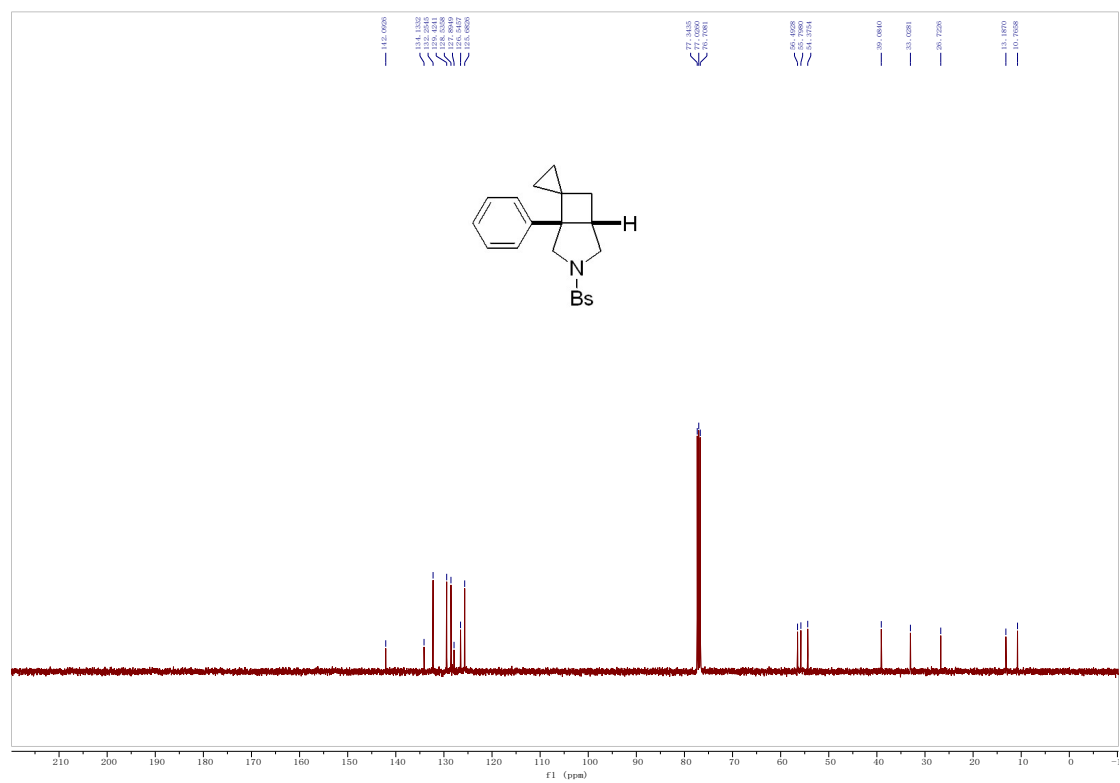

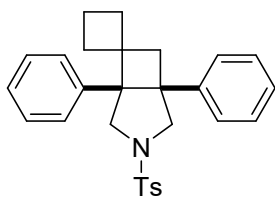

**Compound 2v:** Yield: 70.6 mg, 79%; A white solid; M.p.: 141 - 143 °C;  $^1\text{H}$  NMR (400 MHz,  $\text{CDCl}_3$ )  $\delta$  7.72 (d,  $J = 7.8$  Hz, 2H), 7.32 (d,  $J = 7.8$  Hz, 2H), 7.08 – 7.04 (m, 6H), 6.65 – 6.58 (m, 4H), 4.19 (d,  $J = 9.3$  Hz, 1H), 3.75 (d,  $J = 9.6$  Hz, 1H), 3.13 – 3.06 (m, 2H), 2.75 – 2.68 (m, 2H), 2.43 (s, 3H), 2.34 – 2.23 (m, 2H), 1.84 – 1.76 (m, 1H), 1.48 – 1.43 (m, 2H), 1.30 – 1.22 (m, 1H);  $^{13}\text{C}$  NMR (100 MHz,  $\text{CDCl}_3$ )  $\delta$  143.8, 142.6, 138.3, 131.7, 129.7, 128.1, 128.0, 127.9, 127.6, 127.3, 126.1, 126.0, 64.9, 61.3, 54.8, 52.9, 45.7, 45.0, 34.3, 31.1, 21.6, 14.0  $\text{cm}^{-1}$ ; IR (neat):  $\nu$  2919, 1738, 1466, 1349, 1167, 1013, 702, 663  $\text{cm}^{-1}$ ; HRMS (ESI - TOF) Calcd. for  $\text{C}_{28}\text{H}_{29}\text{NO}_2\text{SNa}$   $[\text{M}+\text{Na}]^+$ : 466.1811, Found: 466.1817.

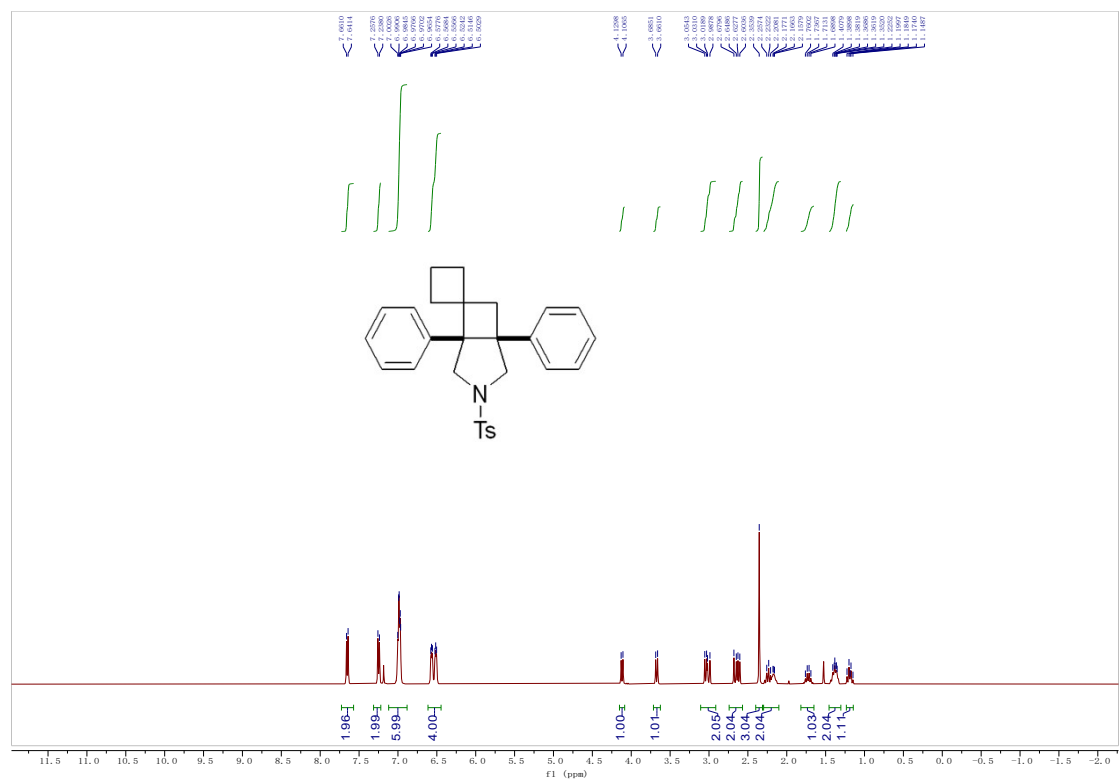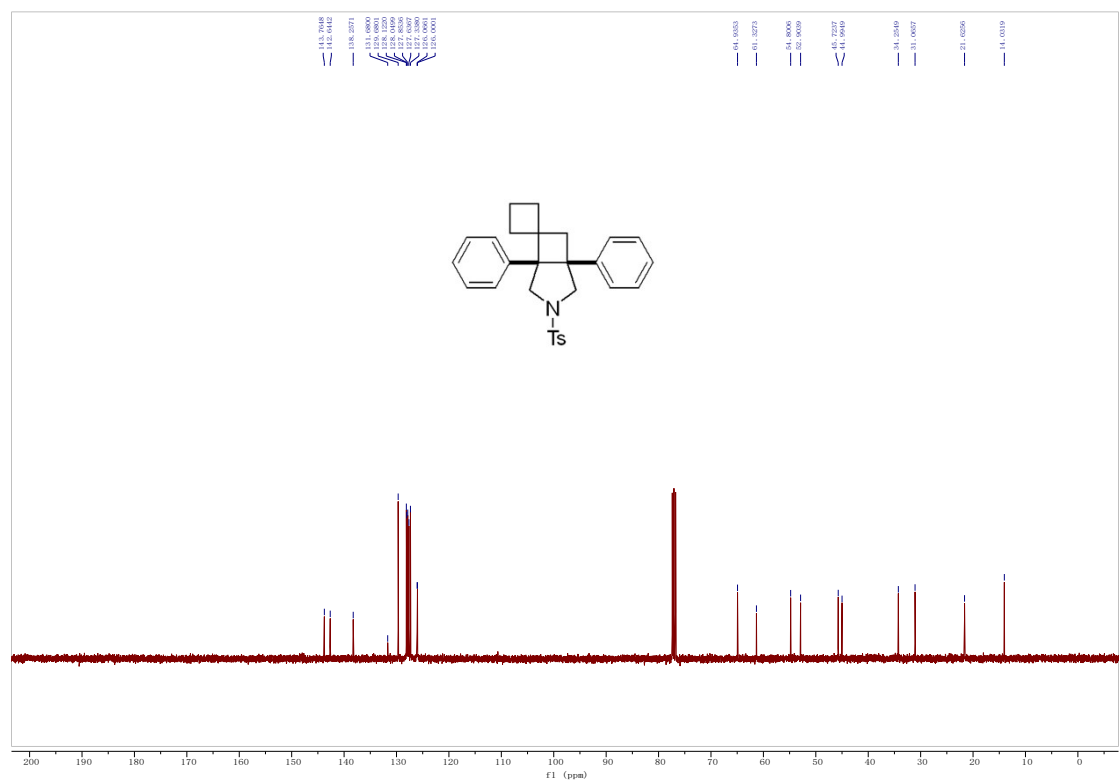



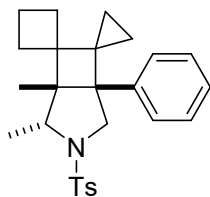

**Compound 2x:** Yield: 65.6 mg, 77%; A white solid; M.p.: 182 - 184 °C;  $^1\text{H}$  NMR (400 MHz,  $\text{CDCl}_3$ )  $\delta$  7.76 – 7.74 (m, 2H), 7.34 (d,  $J$  = 7.9 Hz, 2H), 7.27 – 7.22 (m, 2H), 7.17 – 7.10 (m, 3H), 3.59 (d,  $J$  = 9.8 Hz, 1H), 3.18 (d,  $J$  = 9.8 Hz, 1H), 2.56 (q,  $J$  = 6.8 Hz, 1H), 2.49 – 2.47 (m, 1H), 2.46 (s, 3H), 2.17 – 2.11 (m, 1H), 2.02 – 1.91 (m, 2H), 1.62 – 1.58 (m, 1H), 1.55 (d,  $J$  = 6.8 Hz, 3H), 1.22 – 1.19 (m, 1H), 1.01 – 0.87 (m, 2H), 0.75 – 0.69 (m, 1H), 0.72 (s, 3H), 0.35 – 0.29 (m, 1H);  $^{13}\text{C}$  NMR (100 MHz,  $\text{CDCl}_3$ )  $\delta$  143.6, 139.4, 132.8, 129.6, 128.2, 128.1, 127.8, 126.2, 66.5, 56.0, 54.6, 52.4, 49.5, 34.9, 30.7, 29.8, 21.6, 17.7, 17.1, 15.4, 11.1, 9.3; IR (neat):  $\nu$  2962, 2359, 1457, 1339, 1164, 1018, 768, 701, 662  $\text{cm}^{-1}$ ; HRMS (ESI - TOF) Calcd. for  $\text{C}_{26}\text{H}_{31}\text{NO}_2\text{SNa}$   $[\text{M}+\text{Na}]^+$ : 444.1968, Found: 444.1974.

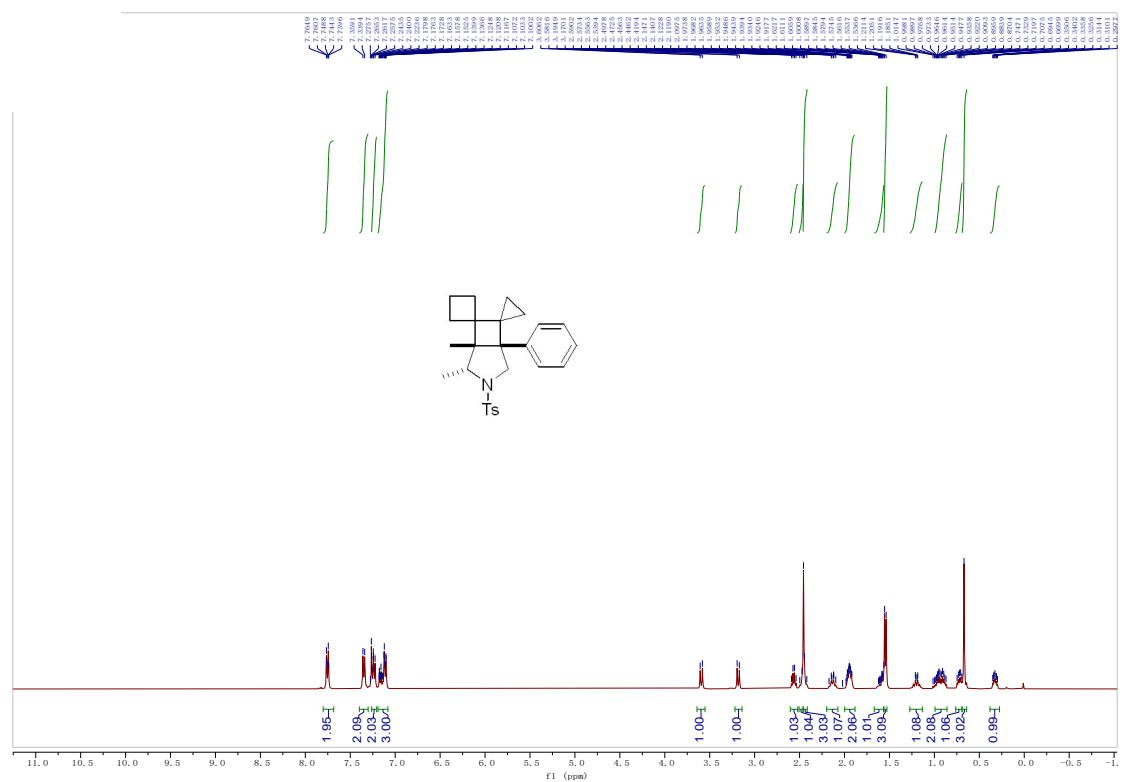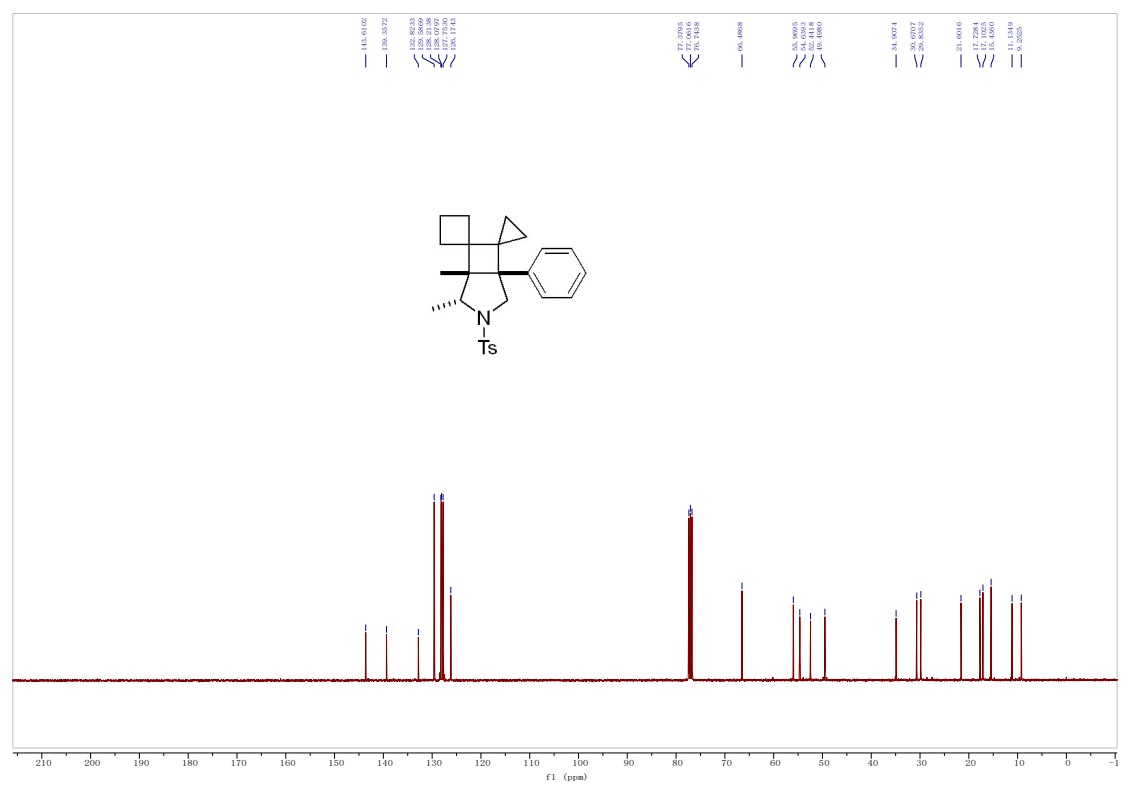

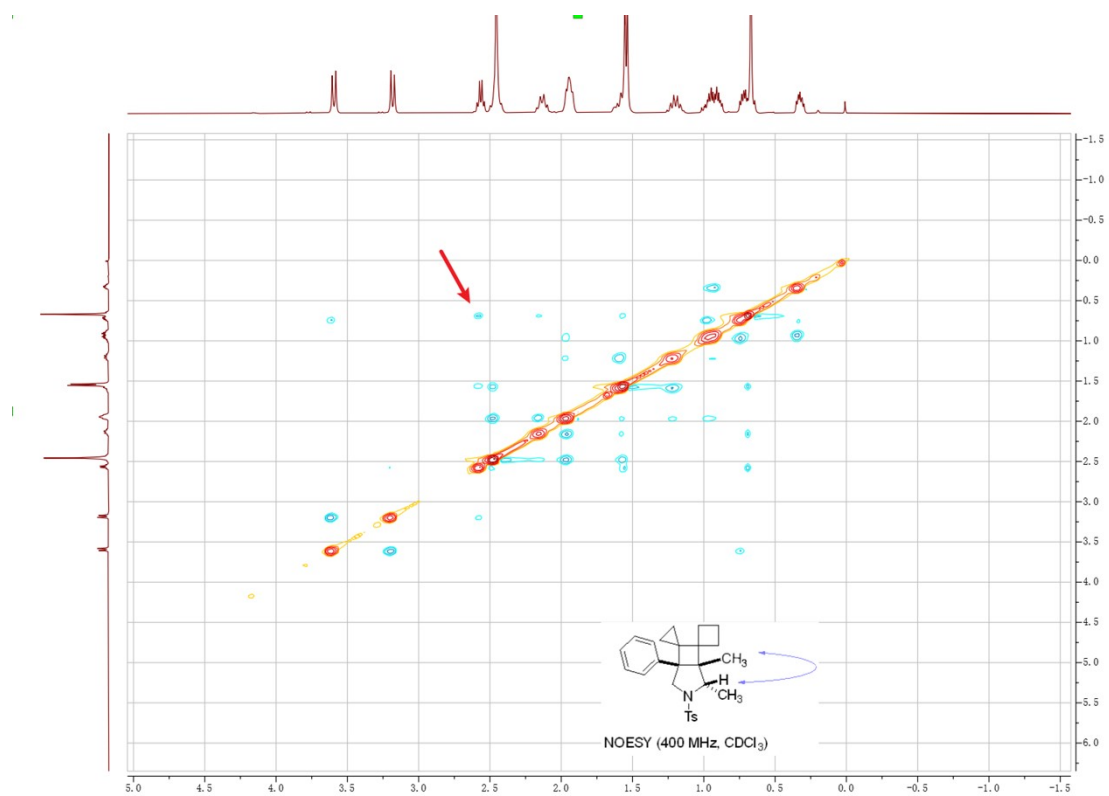

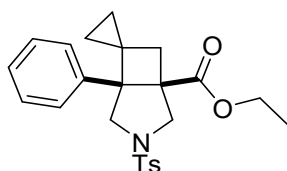

**Compound 2aa:** Yield: 74.8 mg, 88%; Colorless oil;  $^1\text{H}$  NMR (400 MHz,  $\text{CDCl}_3$ )  $\delta$  7.78 (d,  $J = 8.2$  Hz, 2H), 7.36 (d,  $J = 8.2$  Hz, 2H), 7.25 – 7.18 (m, 2H), 7.17 – 7.10 (m, 3H), 3.74 – 3.65 (m, 3H), 3.52 (d,  $J = 9.5$  Hz, 1H), 3.30 – 3.18 (m, 3H), 2.44 (s, 3H), 2.10 (d,  $J = 12.4$  Hz, 1H), 0.77 – 0.66 (m, 5H), 0.61 – 0.53 (m, 1H), 0.19 – 0.11 (m, 1H).  $^{13}\text{C}$  NMR (100 MHz,  $\text{CDCl}_3$ )  $\delta$  171.3, 143.8, 138.3, 132.5, 129.7, 128.0, 127.8, 126.9, 126.7, 61.6, 60.9, 57.6, 55.4, 53.1, 36.1, 24.5, 21.5, 13.6, 13.5, 12.1; IR (neat):  $\nu$  2976, 1838, 1751, 1762, 1488, 1309, 1285, 1184, 773,  $\text{cm}^{-1}$ ; HRMS (ESI - TOF) Calcd. for  $\text{C}_{24}\text{H}_{27}\text{NO}_4\text{SNa}$   $[\text{M}+\text{Na}]^+$ : 448.1553, Found: 448.1555.

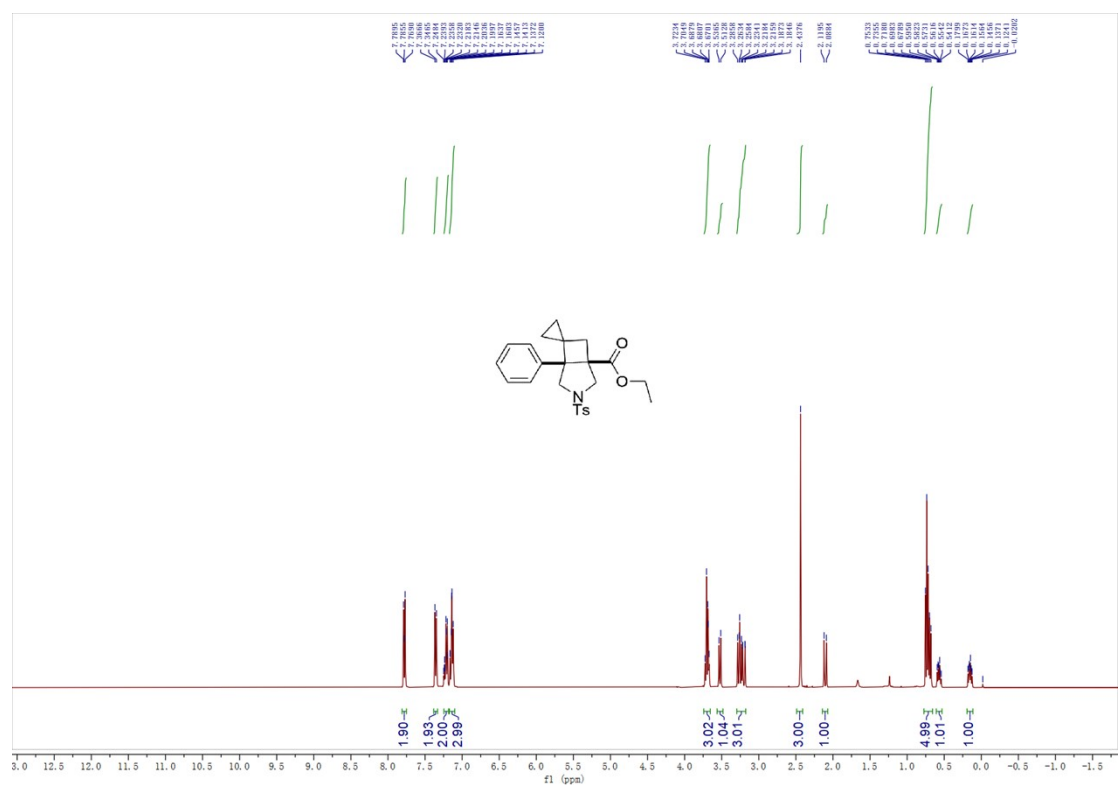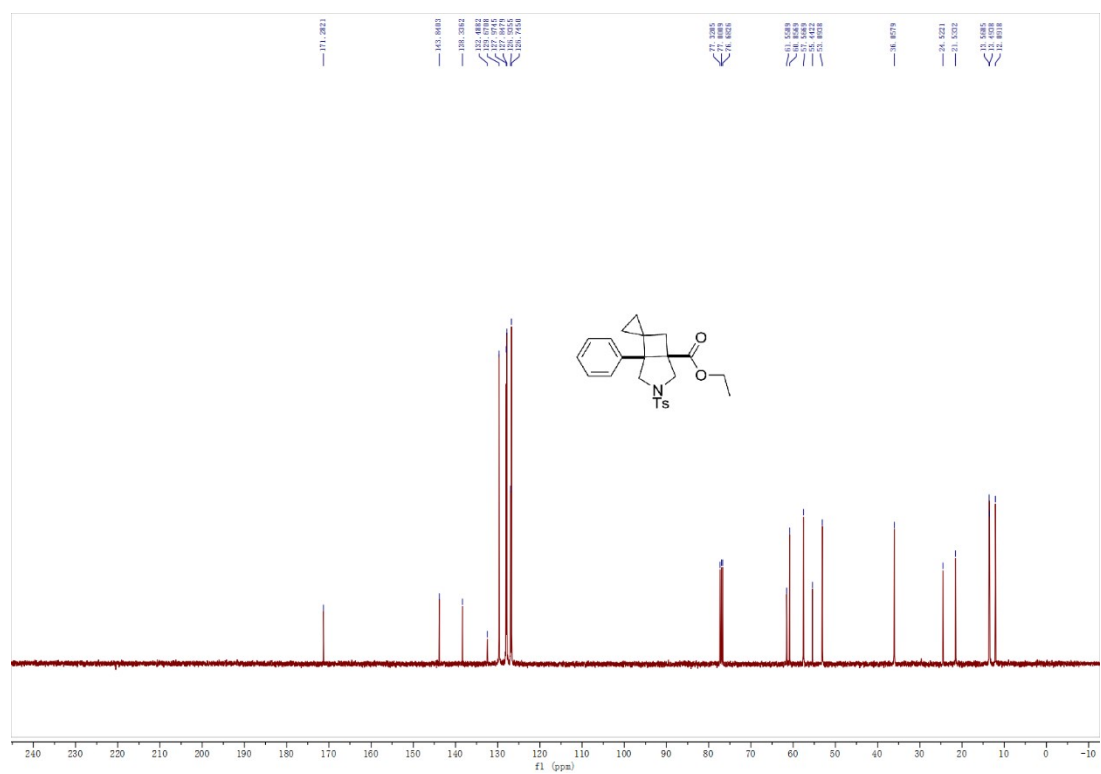

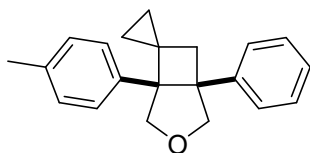

**Compound 2ab:** Yield: 51.1 mg, 88%; Colorless oil;  $^1\text{H}$  NMR (400 MHz,  $\text{CDCl}_3$ )  $\delta$  7.23 – 7.06 (m, 3H), 6.98 – 6.84 (m, 4H), 6.73 (d,  $J = 7.8$  Hz, 2H), 4.30 (d,  $J = 9.1$  Hz, 1H), 4.26 – 4.18 (m, 2H), 3.74 (d,  $J = 9.1$  Hz, 1H), 3.07 (d,  $J = 11.8$  Hz, 1H), 2.43 (d,  $J = 11.8$  Hz, 1H), 2.23 (s, 3H), 0.75 – 0.65 (m, 2H), 0.47 – 0.38 (m, 1H), 0.12 – 0.01 (m, 1H).  $^{13}\text{C}$  NMR (100 MHz,  $\text{CDCl}_3$ )  $\delta$  141.6, 136.2, 135.3, 128.2, 128.0, 127.9, 127.7, 125.7, 84.6, 74.6, 61.7, 55.2, 39.4, 25.1, 20.9, 13.8, 11.2; IR (neat):  $\nu$  2966, 1978, 1856, 1734, 1323, 1297, 1239, 1184, 1136, 691, 683  $\text{cm}^{-1}$ ; HRMS (EI - FI) Calcd. for  $\text{C}_{21}\text{H}_{22}\text{O}$   $[\text{M}]^+$ : 290.1665, Found: 290.1668.

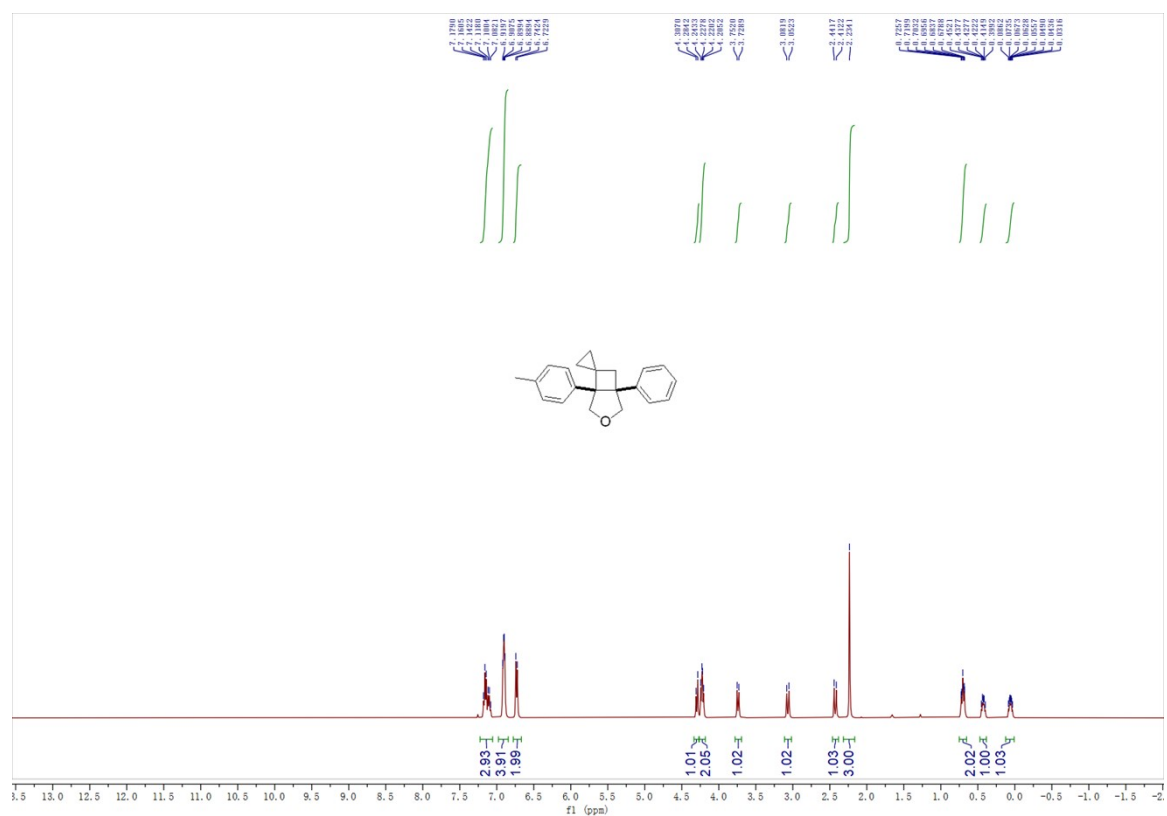

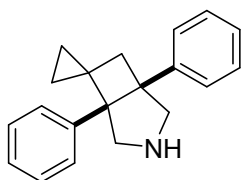

**Compound 3t:** Yield: 48.1 mg, 87%; A white solid; M.p.: 103 - 105 °C;  $^1\text{H}$  NMR (400 MHz,  $\text{CDCl}_3$ )  $\delta$  7.14 – 7.00 (m, 6H), 6.97 – 6.89 (m, 2H), 6.86 – 6.76 (m, 2H), 3.47 (d,  $J$  = 12.0 Hz, 1H), 3.33 (d,  $J$  = 12.4 Hz, 1H), 3.22 – 3.09 (m, 2H), 3.00 – 2.94 (m, 2H), 2.17 (d,  $J$  = 12.0 Hz, 1H), 0.69 – 0.58 (m, 2H), 0.54 – 0.42 (m, 1H), 0.13 – 0.01 (m, 1H).  $^{13}\text{C}$  NMR (100 MHz,  $\text{CDCl}_3$ )  $\delta$  143.7, 140.8, 128.5, 127.5, 127.4, 127.2, 125.6, 125.3, 66.8, 62.8, 55.8, 54.6, 39.6, 24.3, 14.1, 10.9; IR (neat):  $\nu$  3071, 2987, 2862, 1602, 1500, 1417, 999, 811, 780  $\text{cm}^{-1}$ ; HRMS (ESI - TOF) Calcd. for  $\text{C}_{20}\text{H}_{22}\text{N}$   $[\text{M}+\text{H}]^+$ : 276.1747, Found: 276.1744.



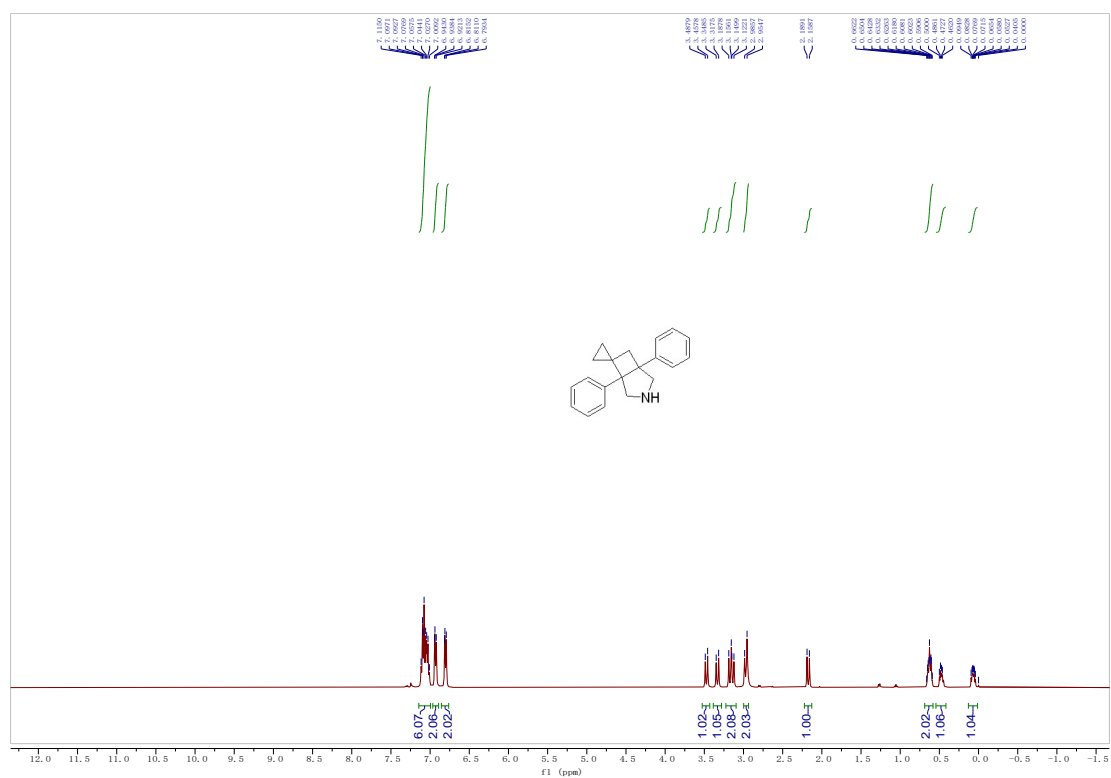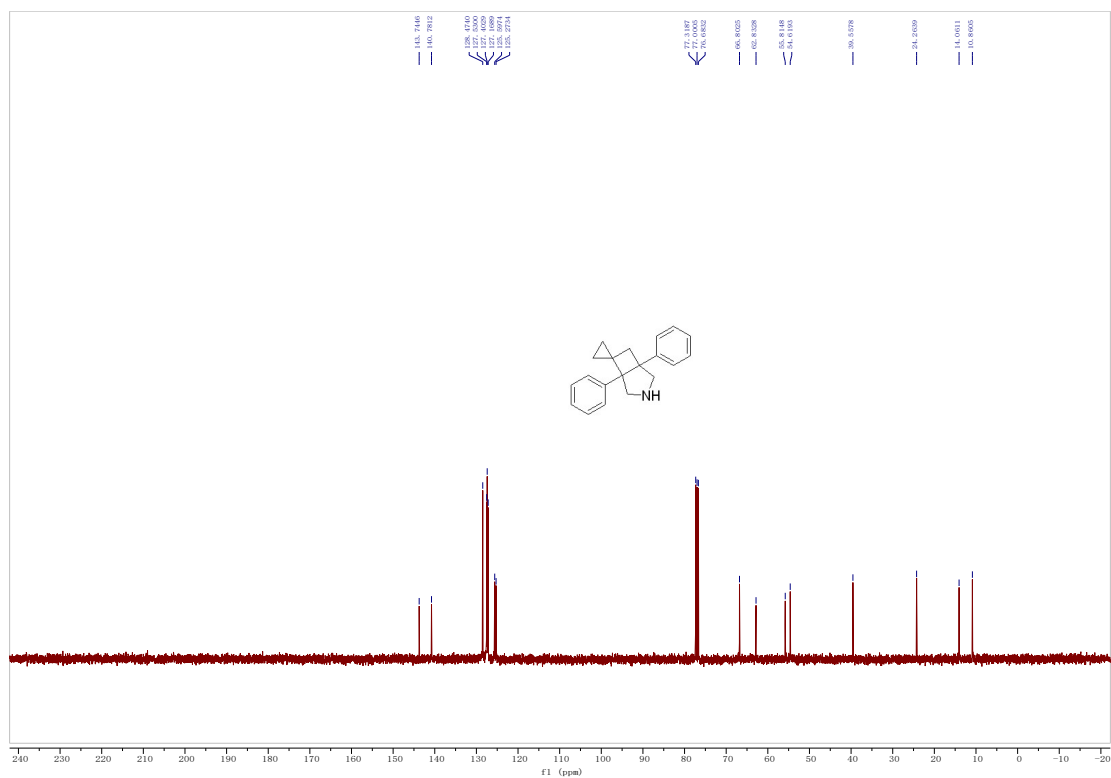

## (12) X-ray Crystal Data of **2a**.

Single crystals of **2a** were grown in dichloromethane and hexanes. Hexanes (2.0 mL) were added to **2a** (20.0 mg in a 4.0 mL vial) followed by five drops of dichloromethane. The 4.0 mL vial was capped and placed at room temperature in the experimental cabinet for seven days or longer if necessary, whereupon crystals were formed.

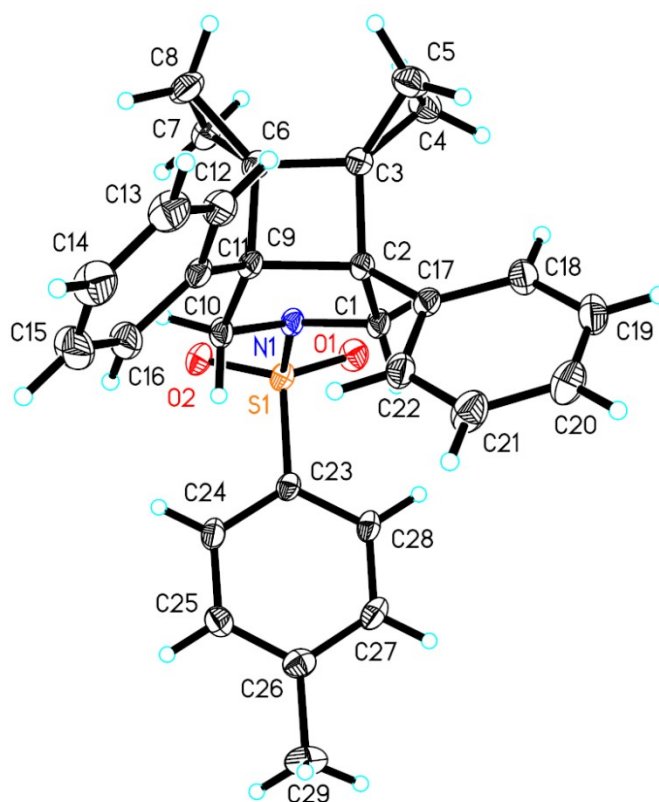

The crystal data of **2a** have been deposited in CCDC with number 2064517. Empirical Formula:  $C_{62}H_{68}N_2O_5S_2$  ( $2 \times \mathbf{2a} \cdot EtOEt$ ); Formula Weight: 985.30; Crystal Color, Habit: colorless, Crystal Dimensions: 0.200 x 0.150 x 0.060 mm<sup>3</sup>; Crystal System: Triclinic; Lattice Parameters:  $a = 11.1766(4)\text{\AA}$ ,  $b = 14.1911(7)\text{\AA}$ ,  $c = 17.3803(7)\text{\AA}$ ,  $\alpha = 79.0480(10)^\circ$ ,  $\beta = 84.9910(10)^\circ$ ,  $\gamma = 89.9570(10)^\circ$ ,  $V = 2695.8(2)\text{\AA}^3$ ; Space group: P -1;  $Z = 4$ ;  $D_{calc} = 1.214\text{ g/cm}^3$ ;  $F_{000} = 1052$ ; Final R indices [ $I > 2\sigma(I)$ ]  $R1 = 0.0621$ ,  $wR2 = 0.1537$ . The thermal ellipsoids are set at a 30% probability level.

### (13) References.

1. F. F. Wong, P.-W. Chang, H.-C. Lin, B.-J. You, J.-J. Huang and S.-K. Lin, *J. Organomet. Chem.*, 2009, **694**, 3452-3455.
2. O. Delgado, A. Monteagudo, M. Van Gool, A. A. Trabanco and S. Fustero, *Org. & Biomol. Chem.*, 2012, **10**, 6758-6766.
3. J. F. Teichert, S. Zhang, A. W. v. Zijl, J. W. Slaa, A. J. Minnaard and B. L. Feringa, *Org. Lett.*, 2010, **12**, 4658-4660.
4. B. V. S. Reddy, D. N. Chaya, J. S. Yadav, R. Grée, *Synthesis.*, 2012, **44**, 297-303.
